# Supplementary material for: Hemodynamic Changes During Physiological and Pharmacological Stress Testing in Healthy Subjects, Aortic Stenosis and Aortic Coarctation Patients–A Systematic Review and Meta-Analysis
Source: PubMed Central journal article supplement (PMC6467940; doi:10.3389/fcvm.2019.00043), 2019-04-10
Supplement: Data_Sheet_1.pdf [file Data_Sheet_1.pdf]

*Supplementary Material*

**Hemodynamic Changes During Physiological and  
Pharmacological Stress Testing in Healthy Subjects, Aortic  
Stenosis and Aortic Coarctation Patients – A Systematic  
Review and Meta-Analysis**

**Kilian Runte<sup>1,2</sup>, Kay Brosien<sup>1</sup>, Maximilian Salcher-Konrad<sup>3,4</sup>, Charlotte Schubert<sup>1,2</sup>, Leonid Goubergrits<sup>1</sup>, Sebastian Kelle<sup>5,6,7</sup>, Stephan Schubert<sup>2,7</sup>, Felix Berger<sup>2,7</sup>, Titus Kuehne<sup>1,2,7</sup>, Marcus Kelm<sup>1,2\*</sup>**

<sup>1</sup> Institute for Imaging Science and Computational Modelling in Cardiovascular Medicine, Charité – Universitätsmedizin Berlin, Berlin, Germany

<sup>2</sup> Department of Congenital Heart Disease, German Heart Center Berlin, Berlin, Germany

<sup>3</sup> Personal Social Services Research Unit, London School of Economics and Political Science, London, UK

<sup>4</sup> LSE Health, London School of Economics and Political Science, London, UK

<sup>5</sup> Department of Internal Medicine / Cardiology, German Heart Center Berlin, Berlin, Germany

<sup>6</sup> Department of Internal Medicine / Cardiology, Charité – Universitätsmedizin Berlin, Berlin, Germany

<sup>7</sup> DZHK (German Center for Cardiovascular Research), Partner Site Berlin, Berlin, Germany

**\* Correspondence:**

Dr. Marcus Kelm

mkelm@dhzb.de

**Supplementary Tables****Table S1.** Search terms used for database search.

| PubMed, 05 November 2017 |                                                                                                                         | N           |
|--------------------------|-------------------------------------------------------------------------------------------------------------------------|-------------|
| 1                        | a) MRI/Magnetic resonance / "Magnetic resonance imaging"[Mesh]                                                          | 709772      |
|                          | b) Echocardiography / "Echocardiography"[Mesh]                                                                          | 157496      |
| 2                        | a) Exercise / "Exercise"[Mesh] / "Exercise Test"[Mesh]                                                                  | 357727      |
|                          | b) Dobutamine* / "Dobutamine"[Mesh]                                                                                     | 9193        |
|                          | c) Handgrip / Isometric exercise / "Isometric Contraction"[Mesh]                                                        | 369960      |
| 3                        | a) Healthy subjects / Normal subjects / Control subjects / Volunteers / Controls / Normals / "Healthy Volunteers"[Mesh] | 1271554     |
|                          | b) Coarctation / "Aortic Coarctation"[Mesh]                                                                             | 11367       |
|                          | c) Aortic stenosis / "Aortic Valve Stenosis"[Mesh]                                                                      | 49594       |
| 4                        | a) Flow / Blood flow / Aortic flow / Peak flow / "Blood Flow Velocity"[Mesh] / "Regional Blood Flow"[Mesh]              | 722612      |
|                          | b) "Stroke volume" / "Stroke index" / "Stroke volume"[Mesh]                                                             | 45516       |
|                          | c) "Cardiac output" / "Cardiac index" / "Cardiac output"[Mesh]                                                          | 102882      |
|                          | d) "Time to peak" / "Systolic time" / "Ejection time"                                                                   | 10491       |
| 5                        | (1a OR 1b) AND (2a OR 2b OR 2c) AND (3a OR 3b OR 3c) AND (4a OR 4b OR 4c OR 4d)                                         | 1616        |
| 6                        | Limit to: Humans; English, German; Publication after 1985/01/01                                                         | 1372        |
| 7                        | Limit to: Full text availability                                                                                        | <b>1188</b> |

**Table S2.** Characteristics of the included studies for healthy subjects.

| Author          | Publication                                                                                                                                                                                    | Location    | Subjects | Mean age (yrs) | Special characteristics | Type of Stress Test | Intensity of Stress   | Imaging Modality | Relevant Outcomes reported | Comments                            | Quality        |
|-----------------|------------------------------------------------------------------------------------------------------------------------------------------------------------------------------------------------|-------------|----------|----------------|-------------------------|---------------------|-----------------------|------------------|----------------------------|-------------------------------------|----------------|
| Barber (2016)   | Magnetic Resonance-Augmented Cardiopulmonary Exercise Testing: Comprehensively Assessing Exercise Intolerance in Children With Cardiovascular Disease. <i>Circ Cardiovasc Imaging</i> , 9(12). | UK          | 10       | 13             | children                | supine ergometer    | sub-maximal; 4,8 METS | MRI              | HR, SVI, CI, EF            | Intended high intensity not reached | 16/19 high     |
| Roberts (2015)  | Real-time aortic pulse wave velocity measurement during exercise stress testing. <i>J Cardiovasc Magn Reson</i> , 17, 86.                                                                      | New Zealand | 50       | 52.6           | -                       | supine ergometer    | 38 W                  | MRI              | HR, SV, CO, EF             |                                     | 10/17 moderate |
| Forouzan (2015) | Non-invasive measurement using cardiovascular magnetic resonance of changes in pulmonary artery stiffness with exercise. <i>J Cardiovasc Magn Reson</i> , 17, 109.                             | USA         | 15       | 26.5           | -                       | supine leg-stepping | - 45 W<br>- 35 W      | MRI              | HR, SV, CO                 | 2 different stress intensities      | 9/17 moderate  |

Supplementary Material: Hemodynamic Changes during Stress Testing

|                                 |                                                                                                                                                                                                      |                |           |             |          |                            |                                                                               |            |                       |                                                                               |                           |
|---------------------------------|------------------------------------------------------------------------------------------------------------------------------------------------------------------------------------------------------|----------------|-----------|-------------|----------|----------------------------|-------------------------------------------------------------------------------|------------|-----------------------|-------------------------------------------------------------------------------|---------------------------|
| <p>Claessen (2015)</p>          | <p>Pulmonary vascular and right ventricular reserve in patients with normalized resting hemodynamics after pulmonary endarterectomy. <i>J Am Heart Assoc</i>, 4(3), e001602.</p>                     | <p>Belgium</p> | <p>14</p> | <p>36</p>   | <p>-</p> | <p>supine ergometer</p>    | <p>142 W</p>                                                                  | <p>MRI</p> | <p>HR, SV, CO, EF</p> |                                                                               | <p>14/19<br/>high</p>     |
| <p>Barber (2015)</p>            | <p>MR augmented cardiopulmonary exercise testing-a novel approach to assessing cardiovascular function. <i>Physiol Meas</i>, 36(5), N85-94.</p>                                                      | <p>UK</p>      | <p>15</p> | <p>38.6</p> | <p>-</p> | <p>supine ergometer</p>    | <p>exhaustion</p>                                                             | <p>MRI</p> | <p>HR, SV, CO</p>     |                                                                               | <p>11/17<br/>high</p>     |
| <p>Steding-Ehrenborg (2013)</p> | <p>Moderate intensity supine exercise causes decreased cardiac volumes and increased outer volume variations: a cardiovascular magnetic resonance study. <i>J Cardiovasc Magn Reson</i>, 15, 96.</p> | <p>Sweden</p>  | <p>26</p> | <p>30</p>   | <p>-</p> | <p>supine leg-stepping</p> | <p>40 bpm increase in HR</p>                                                  | <p>MRI</p> | <p>HR, SV, CO, EF</p> |                                                                               | <p>9/17<br/>moderate</p>  |
| <p>Weber (2011)</p>             | <p>High-resolution phase-contrast MRI of aortic and pulmonary blood flow during rest and physical exercise using a MRI compatible bicycle ergometer. <i>Eur J Radiol</i>, 80(1), 103-108.</p>        | <p>Germany</p> | <p>20</p> | <p>26.8</p> | <p>-</p> | <p>supine ergometer</p>    | <p>- No load operation<br/>- 40 % increase in HR<br/>- 80% increase in HR</p> | <p>MRI</p> | <p>CO, TTP</p>        | <p>3 different stress intensities (no load operation only in 10 subjects)</p> | <p>10/17<br/>moderate</p> |

Supplementary Material: Hemodynamic Changes during Stress Testing

|                       |                                                                                                                                                                                                                               |             |    |      |   |                  |                                  |     |                      |                                       |                |
|-----------------------|-------------------------------------------------------------------------------------------------------------------------------------------------------------------------------------------------------------------------------|-------------|----|------|---|------------------|----------------------------------|-----|----------------------|---------------------------------------|----------------|
| Punta-wangkoon (2009) | Reduced peripheral arterial blood flow with preserved cardiac output during submaximal bicycle exercise in elderly heart failure." <i>J Cardiovasc Magn Reson</i> 11:48.                                                      | USA         | 13 | 67   | - | supine ergometer | sub-maximal; 37 W                | MRI | HR, CO               | CO given as mean aortic flow in l/min | 15/19 high     |
| Roest (March 2001)    | Biventricular response to supine physical exercise in young adults assessed with ultrafast magnetic resonance imaging." <i>Am J Cardiol</i> 87(5): 601-605.                                                                   | Netherlands | 16 | 17.5 | - | supine ergometer | sub-maximal; 130 W               | MRI | HR, SV, CO, EF       |                                       | 9/17 moderate  |
| Roest (November 2001) | Prolonged cardiac recovery from exercise in asymptomatic adults late after atrial correction of transposition of the great arteries: evaluation with magnetic resonance flow mapping. <i>Am J Cardiol</i> , 88(9), 1011-1017. | Netherlands | 12 | 28   | - | supine ergometer | sub-maximal; 60 % of $VO_{2max}$ | MRI | HR, SV, CO           |                                       | 12/19 moderate |
| Niezen (1998)         | Measurement of aortic and pulmonary flow with MRI at rest and during physical exercise. <i>J Comput Assist Tomogr</i> , 22(2), 194-201.                                                                                       | Netherlands | 16 | 30   | - | supine ergometer | - 50 W<br>- 100 W                | MRI | HR, SV, CO, TTP, SET | 2 different stress intensities        | 7/17 moderate  |

Supplementary Material: Hemodynamic Changes during Stress Testing

|                   |                                                                                                                                                                                                                                        |         |          |          |                |                       |                                          |     |                 |                                      |                |
|-------------------|----------------------------------------------------------------------------------------------------------------------------------------------------------------------------------------------------------------------------------------|---------|----------|----------|----------------|-----------------------|------------------------------------------|-----|-----------------|--------------------------------------|----------------|
| Stephensen (2016) | Changes in blood volume shunting in patients with atrial septal defects: Assessment of heart function with cardiovascular magnetic resonance during dobutamine stress. <i>Eur Heart J Cardiovasc Imaging</i> . 2017;18:1145-1152.      | Sweden  | 16       | 35       | -              | dobutamine ± atropine | 20 μg/kg/min (70% of HR <sub>max</sub> ) | MRI | HR, SVI, CI, EF |                                      | 12/19 moderate |
| Pingitore (2013)  | Influence of preload and afterload on stroke volume response to low-dose dobutamine stress in patients with non-ischemic heart failure: a cardiac MR study. <i>Int J Cardiol</i> , 166(2), 475-481.                                    | Italy   | 12       | 55       | -              | dobutamine            | 20 μg/kg/min                             | MRI | HR, SV, CO, EF  |                                      | 14/19 high     |
| Ahtarovski (2013) | Termination of dobutamine infusion causes transient rebound left heart diastolic dysfunction in healthy elderly women but not in men: a cardiac magnetic resonance study. <i>Am J Physiol Heart Circ Physiol</i> , 305(7), H1098-1103. | Denmark | 10<br>10 | 65<br>65 | male<br>female | dobutamine            | 15 μg/kg/min                             | MRI | HR, SVI, CI, EF | 2 different cohorts: male and female | 12/19 moderate |

Supplementary Material: Hemodynamic Changes during Stress Testing

|                   |                                                                                                                                                                                                                           |             |              |                  |                  |                                    |                                                       |     |                 |                                                             |                |
|-------------------|---------------------------------------------------------------------------------------------------------------------------------------------------------------------------------------------------------------------------|-------------|--------------|------------------|------------------|------------------------------------|-------------------------------------------------------|-----|-----------------|-------------------------------------------------------------|----------------|
| Ahtarovski (2012) | Left atrial and ventricular function during dobutamine and glycopyrrolate stress in healthy young and elderly as evaluated by cardiac magnetic resonance. <i>Am J Physiol Heart Circ Physiol</i> , 303(12), H1469-1473.   | Denmark     | 20<br>20     | 25<br>65         | young<br>elderly | dobutamine                         | 15<br>μg/kg/min                                       | MRI | HR, SVI, CI, EF | 2 different cohorts: young and elderly                      | 13/19 moderate |
| Schuster (2011)   | Cardiovascular magnetic resonance myocardial feature tracking detects quantitative wall motion during dobutamine stress." <i>J Cardiovasc Magn Reson</i> 13:58.                                                           | UK          | 10           | 40.6             | -                | dobutamine                         | - 10<br>μg/kg/min<br><br>- 20<br>μg/kg/min            | MRI | HR, SVI, CI, EF | 2 different stress intensities                              | 9/17 moderate  |
| Mandapaka (2011)  | Simultaneous measurement of left and right ventricular volumes and ejection fraction during dobutamine stress cardiovascular magnetic resonance. <i>J Comput Assist Tomogr</i> , 35(5), 614-618.                          | USA         | 13           | 53               | -                | dobutamine ± atropine              | - 7.5<br>μg/kg/min<br><br>- 80 % of HR <sub>max</sub> | MRI | HR, SV, EF      | 2 different stress intensities                              | 10/17 moderate |
| Oosterhof (2005)  | Disparity between dobutamine stress and physical exercise magnetic resonance imaging in patients with an intra-atrial correction for transposition of the great arteries. <i>J Cardiovasc Magn Reson</i> , 7(2), 383-389. | Netherlands | 11<br><br>14 | 28.9<br><br>26.8 | -                | dobutamine<br><br>supine ergometer | - 15<br>μg/kg/min<br><br>- 60% of VO <sub>2max</sub>  | MRI | HR, SVI, CI, EF | 2 different cohorts: dobutamine stress vs. ergometer stress | 11/19 moderate |

Supplementary Material: Hemodynamic Changes during Stress Testing

|                                 |                                                                                                                                                                                                             |             |    |    |   |            |                                                                     |     |                 |                                |                |
|---------------------------------|-------------------------------------------------------------------------------------------------------------------------------------------------------------------------------------------------------------|-------------|----|----|---|------------|---------------------------------------------------------------------|-----|-----------------|--------------------------------|----------------|
| Dodge-Khatami (2002)            | Comparable systemic ventricular function in healthy adults and patients with unoperated congenitally corrected transposition using MRI dobutamine stress testing." <i>Ann Thorac Surg</i> 73(6): 1759-1764. | Netherlands | 11 | 31 | - | dobutamine | 15 µg/kg/min                                                        | MRI | HR, SVI, CI, EF |                                | 10/19 moderate |
| Pennell (1995)                  | Assessment of magnetic resonance velocity mapping of global ventricular function during dobutamine infusion in coronary artery disease. <i>Br Heart J</i> , 74(2), 163-170.                                 | UK          | 10 | 51 | - | Dobutamine | - 5 µg/kg/min<br>- 10 µg/kg/min<br>- 15 µg/kg/min<br>- 20 µg/kg/min | MRI | HR, SV, CO      | 4 different stress intensities | 12/19 moderate |
| van Ruge (1993)                 | Quantitation of global and regional left ventricular function by cine magnetic resonance imaging during dobutamine stress in normal human subjects. <i>Eur Heart J</i> , 14(4), 456-463.                    | Netherlands | 23 | 25 | - | dobutamine | 15 µg/kg/min                                                        | MRI | HR, SV, CO, EF  |                                | 10/17 moderate |
| Knobelsdorff-Brenkenhoff (2013) | Isometric handgrip exercise during cardiovascular magnetic resonance imaging: set-up and cardiovascular effects. <i>J Magn Reson Imaging</i> , 37(6), 1342-1350.                                            | Germany     | 53 | 45 | - | handgrip   | 30 % of maximal voluntary contraction (MVC)                         | MRI | HR, SV, CO      |                                | 10/17 moderate |



Supplementary Material: Hemodynamic Changes during Stress Testing

|                 |                                                                                                                                                                                                                                                                     |                |    |      |        |                      |                                 |      |                |  |                |
|-----------------|---------------------------------------------------------------------------------------------------------------------------------------------------------------------------------------------------------------------------------------------------------------------|----------------|----|------|--------|----------------------|---------------------------------|------|----------------|--|----------------|
| D'Alto (2017)   | Echocardiographic assessment of right ventricular contractile reserve in healthy subjects. Echocardiography 34(1): 61-68.                                                                                                                                           | Belgium, Italy | 90 | 39   | -      | semisupine ergometer | 177 W                           | Echo | HR, SV, CO     |  | 10/17 moderate |
| D'Andrea (2016) | Right atrial morphology and function in patients with systemic sclerosis compared to healthy controls: a two-dimensional strain study. Clin Rheumatol, 35(7), 1733-1742.                                                                                            | Italy          | 55 | 50.6 | -      | supine ergometer     | 144 W                           | Echo | HR, SV         |  | 14/19 high     |
| Wang (2014)     | Changes of ventricular and peripheral performance in patients with heart failure and normal ejection fraction: insights from ergometry stress echocardiography. Eur J Heart Fail, 16(8), 888-897.                                                                   | Hong Kong      | 50 | 56   | -      | semisupine ergometer | 85% of HR <sub>max</sub> ; 89 W | Echo | HR, SVI, CI    |  | 13/19 moderate |
| Khoury (2014)   | Utility of 3-dimensional echocardiography, global longitudinal strain, and exercise stress echocardiography to detect cardiac dysfunction in breast cancer patients treated with doxorubicin-containing adjuvant therapy. Breast Cancer Res Treat, 143(3), 531-539. | Denmark        | 20 | 57   | female | upright treadmill    | exhaustion; 8.7 METS            | Echo | HR, SV, CI, EF |  | 15/19 high     |

Supplementary Material: Hemodynamic Changes during Stress Testing

|                  |                                                                                                                                                                                           |           |          |            |                                         |                      |                  |      |                |                                                              |                |
|------------------|-------------------------------------------------------------------------------------------------------------------------------------------------------------------------------------------|-----------|----------|------------|-----------------------------------------|----------------------|------------------|------|----------------|--------------------------------------------------------------|----------------|
| Tan (2013)       | Exercise-induced torsional dyssynchrony relates to impaired functional capacity in patients with heart failure and normal ejection fraction. <i>Heart</i> , 99(4), 259-266.               | UK        | 38       | 71         | -                                       | semisupine ergometer | HR up to 100 bpm | Echo | HR, SVI, CO    |                                                              | 14/19 high     |
| Klasnja (2013)   | Cardiac power output and its response to exercise in athletes and non-athletes. <i>Clin Physiol Funct Imaging</i> , 33(3), 201-205.                                                       | UK        | 32<br>20 | 20<br>19.8 | un-trained<br>trained                   | upright ergometer    | 177 W<br>205 W   | Echo | HR, SV, CO     | 2 different cohorts: untrained vs. trained                   | 11/19 moderate |
| Henein (2013)    | Impaired left ventricular systolic function reserve limits cardiac output and exercise capacity in HFpEF patients due to systemic hypertension. <i>Int J Cardiol</i> , 168(2), 1088-1093. | Sweden    | 14       | 65         | -                                       | semisupine ergometer | exhaustion       | Echo | HR, SV, CO, EF |                                                              | 15/19 high     |
| Lee (2012)       | Exercise with a twist: left ventricular twist and recoil in healthy young and middle-aged men, and middle-aged endurance-trained men. <i>J Am Soc Echocardiogr</i> , 25(9), 986-993.      | Canada    | 11<br>12 | 24<br>53.8 | young un-trained<br>middle aged trained | supine ergometer     | HR up to 105 bpm | Echo | HR, EF         | 2 different cohorts: young untrained vs. middle aged trained | 11/19 high     |
| La Gerche (2012) | Maximal oxygen consumption is best predicted by measures of cardiac size rather than function in healthy adults. <i>Eur J Appl Physiol</i> , 112(6), 2139-2147.                           | Australia | 55       | 37         | -                                       | semisupine ergometer | exhaustion       | Echo | HR, EF         |                                                              | 10/17 moderate |

Supplementary Material: Hemodynamic Changes during Stress Testing

|                      |                                                                                                                                                                      |           |    |      |                    |                      |                           |      |                 |                                                                                    |            |
|----------------------|----------------------------------------------------------------------------------------------------------------------------------------------------------------------|-----------|----|------|--------------------|----------------------|---------------------------|------|-----------------|------------------------------------------------------------------------------------|------------|
| Cheung (2012)        | Dynamic dyssynchrony and impaired contractile reserve of the left ventricle in beta-thalassaemia major: an exercise echocardiographic study. PLoS One, 7(9), e45265. | Hong Kong | 17 | 25,3 | -                  | supine ergometer     | 70 % of HR <sub>max</sub> | Echo | HR, SVI, CI, EF |                                                                                    | 14/19 high |
| Donal (January 2011) | Impact of aortic stenosis on longitudinal myocardial deformation during exercise. Eur J Echocardiogr, 12(3), 235-241.                                                | France    | 43 | 68   | -                  | semisupine ergometer | 92 W                      | Echo | HR, EF          | Study also included in AS group                                                    | 15/17 high |
| Donal (May 2011)     | Comparison of the heart function adaptation in trained and sedentary men after 50 and before 35 years of age. Am J Cardiol, 108(7), 1029-1037.                       | France    | 38 | 61.5 | elderly trained    | semisupine ergometer | sub-maximal<br>110 W      | Echo | SV, CO, EF      | 4 different cohorts: elderly trained vs. untrained vs. young trained vs. untrained | 13/19 high |
|                      |                                                                                                                                                                      |           | 18 | 25.2 | young trained      |                      | 133 W                     |      |                 |                                                                                    |            |
|                      |                                                                                                                                                                      |           | 15 | 58.9 | elderly un-trained |                      | 90 W                      |      |                 |                                                                                    |            |
|                      |                                                                                                                                                                      |           | 27 | 26.2 | young un-trained   |                      | 103 W                     |      |                 |                                                                                    |            |

Supplementary Material: Hemodynamic Changes during Stress Testing

|                   |                                                                                                                                                                                    |         |    |      |          |                      |                            |      |                |  |                   |
|-------------------|------------------------------------------------------------------------------------------------------------------------------------------------------------------------------------|---------|----|------|----------|----------------------|----------------------------|------|----------------|--|-------------------|
| Bombardini (2011) | Abnormal shortened diastolic time length at increasing heart rates in patients with abnormal exercise-induced increase in pulmonary artery pressure. Cardiovasc Ultrasound, 9, 36. | Italy   | 16 | 35   | -        | semisupine ergometer | exhaustion                 | Echo | HR, CI, EF     |  | 14/19<br>high     |
| Dini (2010)       | Peak power output to left ventricular mass: an index to predict ventricular pumping performance and morbidity in advanced heart failure. J Am Soc Echocardiogr, 23(12), 1259-1265. | Italy   | 15 | 55   | -        | semisupine ergometer | 150 W                      | Echo | HR, SV, CO, EF |  | 14/19<br>high     |
| Argiento (2010)   | Exercise stress echocardiography for the study of the pulmonary circulation. Eur Respir J, 35(6), 1273-1278.                                                                       | Belgium | 25 | 36   | -        | semisupine ergometer | 170 W                      | Echo | HR, CO         |  | 9/17<br>moderate  |
| Schuster (2009)   | Cardiac function during exercise in obese prepubertal boys: effect of degree of obesity. Obesity (Silver Spring), 17(10), 1878-1883.                                               | France  | 17 | 11.6 | children | semisupine ergometer | exhaustion;<br>95 W        | Echo | HR, SV, CO     |  | 14/19<br>high     |
| Goodman (2009)    | Left ventricular contractile function is preserved during prolonged exercise in middle-aged men. J Appl Physiol (1985), 106(2), 494-499.                                           | Canada  | 12 | 43.5 | -        | semisupine ergometer | 65 % of VO <sub>2max</sub> | Echo | HR, SV, EF     |  | 10/17<br>moderate |

Supplementary Material: Hemodynamic Changes during Stress Testing

|                   |                                                                                                                                                                                |          |    |      |                                  |                      |                                        |      |                  |                         |                |
|-------------------|--------------------------------------------------------------------------------------------------------------------------------------------------------------------------------|----------|----|------|----------------------------------|----------------------|----------------------------------------|------|------------------|-------------------------|----------------|
| Cotrim (2008)     | Do healthy individuals develop intraventricular gradients during exertion? Rev Port Cardiol, 27(11), 1367-1375.                                                                | Portugal | 34 | 50   | -                                | upright treadmill    | exhaustion                             | Echo | HR, SV, CI       |                         | 11/17 high     |
| Bombardini (2008) | Diastolic time - frequency relation in the stress echo lab: filling timing and flow at different heart rates. Cardiovasc Ultrasound 6: 15.                                     | Italy    | 64 | 57   | controls with normal stress echo | semisupine ergometer | exhaustion                             | Echo | HR, SI, CI, SET  |                         | 11/17 high     |
| De Souza (2007)   | A stress echocardiography study of cardiac function during progressive exercise in pediatric oncology patients treated with anthracyclines. Pediatr Blood Cancer 49(1): 56-64. | Canada   | 12 | 11.9 | children                         | semisupine ergometer | exhaustion                             | Echo | HR, SVI, CI, SET |                         | 12/19 moderate |
| Rowland (2005)    | Effect of pectus excavatum deformity on cardiorespiratory fitness in adolescent boys. Arch Pediatr Adolesc Med 159(11): 1069-1073.                                             | USA      | 20 | 12.5 | children                         | upright ergometer    | - 50 W<br>- 146 W                      | Echo | HR, SVI, CI      | 2 different intensities | 12/19 moderate |
| Sagiv (2000)      | Left ventricular contractility and function at peak aerobic and anaerobic exercises. Med Sci Sports Exerc 32(7): 1197-1201.                                                    | Israel   | 22 | 19   | trained                          | upright ergometer    | - 255 W; aerobic<br>- 457 W; anaerobic | Echo | CO, EF           | 2 different intensities | 12/17 high     |

Supplementary Material: Hemodynamic Changes during Stress Testing

|                 |                                                                                                                                                                                                  |        |    |      |              |                      |                                            |      |                      |                                                                          |                |
|-----------------|--------------------------------------------------------------------------------------------------------------------------------------------------------------------------------------------------|--------|----|------|--------------|----------------------|--------------------------------------------|------|----------------------|--------------------------------------------------------------------------|----------------|
| Auerbach (1999) | Attenuated responses of Doppler-derived hemodynamic parameters during supine bicycle exercise in heart transplant recipients. <i>Cardiology</i> 92(3): 204-209.                                  | Israel | 18 | 51.1 | -            | supine ergometer     | 85 % of HR <sub>max</sub>                  | Echo | HR, SV, CO, SET, TTP |                                                                          | 11/19 moderate |
| Fisman (1990)   | Altered left ventricular volume and ejection fraction responses to supine dynamic exercise in athletes. <i>J Am Coll Cardiol</i> 15(3): 582-588.                                                 | Israel | 22 | 24.3 | - un-trained | supine ergometer     | - 138 W                                    | Echo | HR, EF               | 2 different cohorts: untrained vs. trained                               | 16/19 high     |
|                 |                                                                                                                                                                                                  |        | 22 | 23.1 | - trained    |                      | - 190 W                                    |      |                      |                                                                          |                |
| Ginzton (1989)  | Effect of long-term high intensity aerobic training on left ventricular volume during maximal upright exercise. <i>J Am Coll Cardiol</i> 14(2): 364-371.                                         | USA    | 14 | 28   | un-trained   | upright ergometer    | - 25% of HR <sub>max</sub><br>- exhaustion | Echo | HR, SVI, EF          | 2 different cohorts (untrained vs. trained) with 2 different intensities | 12/19 moderate |
|                 |                                                                                                                                                                                                  |        | 15 | 19   | trained      |                      | - 25% of HR <sub>max</sub><br>- exhaustion |      |                      |                                                                          |                |
| Thompson (1987) | Comparison of ventricular volumes in normal and post-myocardial infarction subjects. <i>Med Sci Sports Exerc</i> 19(5): 430-435.                                                                 | USA    | 13 | 48.5 | -            | semisupine ergometer | 85 % of HR <sub>max</sub>                  | Echo | HR, SV, CO, EF       |                                                                          | 12/19 moderate |
| Mehdirad (1987) | Evaluation of left ventricular function during upright exercise: correlation of exercise Doppler with postexercise two-dimensional echocardiographic results. <i>Circulation</i> 75(2): 413-419. | USA    | 12 | 40   | -            | upright treadmill    | Bruce protocol stage IV                    | Echo | HR, SVI, CI, EF      |                                                                          | 12/19 moderate |

Supplementary Material: Hemodynamic Changes during Stress Testing

|               |                                                                                                                                            |           |          |          |        |                                    |                                                                     |      |                   |                                                                             |                |
|---------------|--------------------------------------------------------------------------------------------------------------------------------------------|-----------|----------|----------|--------|------------------------------------|---------------------------------------------------------------------|------|-------------------|-----------------------------------------------------------------------------|----------------|
| Gardin (1986) | Studies of Doppler aortic flow velocity during supine bicycle exercise. Am J Cardiol 57(4): 327-332.                                       | USA       | 17       | 20.5     | -      | supine ergometer                   | - 50 W<br>- sub-maximal<br>- exhaustion                             | Echo | HR, SET           | 3 different intensities                                                     | 10/17 moderate |
| Bryg (1986)   | Effect of coronary artery disease on Doppler-derived parameters of aortic flow during upright exercise. Am J Cardiol 58(1): 14-19.         | USA       | 20       | 27       | -      | upright treadmill                  | - Bruce protocol stage II<br>- stage IV                             | Echo | HR, SVI, CI       | 2 different intensities                                                     | 11/19 moderate |
| Lau (2014)    | Dobutamine stress echocardiography for the assessment of pressure-flow relationships of the pulmonary circulation. Chest, 146(4), 959-966. | Australia | 22<br>22 | 46<br>44 | -<br>- | dobutamine<br>semisupine ergometer | 20 µg/kg/min<br>exhaustion                                          | Echo | HR, CO            | 2 different stress types in 2 age matched cohorts: dobutamine vs. ergometer | 14/19 high     |
| Maras (2013)  | Patterns of cardiac dysfunction coinciding with exertional breathlessness in hypertrophic cardiomyopathy. Int J Cardiol, 170(2), 233-238.  | Sweden    | 17       | 58       | -      | dobutamine                         | 85 % of HR <sub>max</sub>                                           | Echo | HR, systolic time | systolic time not convertible into SET                                      | 11/19 moderate |
| Brili (2007)  | Dobutamine stress echocardiography for the evaluation of cardiac reserve late after Fontan operation. Hellenic J Cardiol, 48(5), 252-257.  | Greece    | 10       | 28       | -      | dobutamine                         | - 30 µg/kg/min<br>- 20 µg/kg/min<br>- 10 µg/kg/min<br>- 5 µg/kg/min | Echo | HR, SV, CO, EF    | 4 different intensities<br>age matched controls                             | 13/19 moderate |

Supplementary Material: Hemodynamic Changes during Stress Testing

|                   |                                                                                                                                                                       |        |    |      |                                        |                                    |                                                                                                                                                                                                                                                              |      |                   |                                                                       |                |
|-------------------|-----------------------------------------------------------------------------------------------------------------------------------------------------------------------|--------|----|------|----------------------------------------|------------------------------------|--------------------------------------------------------------------------------------------------------------------------------------------------------------------------------------------------------------------------------------------------------------|------|-------------------|-----------------------------------------------------------------------|----------------|
| Arshad (2004)     | Systole-diastole mismatch in hypertrophic cardiomyopathy is caused by stress induced left ventricular outflow tract obstruction. <i>Am Heart J</i> , 148(5), 903-909. | UK     | 23 | 58   | -                                      | dobutamine                         | 40 $\mu\text{g}/\text{kg}/\text{min}$                                                                                                                                                                                                                        | Echo | HR, systolic time | systolic time not convertible into SET                                | 11/19 moderate |
| Cnota (2003)      | Cardiovascular physiology during supine cycle ergometry and dobutamine stress. <i>Med Sci Sports Exerc</i> , 35(9), 1503-1510.                                        | USA    | 32 | 23.5 | -                                      | dobutamine<br><br>supine ergometer | 85 % of $\text{HR}_{\text{max}}$ ; max. 50 $\mu\text{g}/\text{kg}/\text{min}$<br><br>85 % of $\text{HR}_{\text{max}}$                                                                                                                                        | Echo | HR, SV, CO        | 2 different stress types in the same cohort: dobutamine vs. ergometer | 10/17 moderate |
| Duncan (2001)     | Long axis electromechanics during dobutamine stress in patients with coronary artery disease and left ventricular dysfunction. <i>Heart</i> , 86(4), 397-404.         | UK     | 20 | 58   | -                                      | dobutamine                         | 85 % of $\text{HR}_{\text{max}}$ ; max. 40 $\mu\text{g}/\text{kg}/\text{min}$                                                                                                                                                                                | Echo | HR, SET           |                                                                       | 13/19 moderate |
| Marmor (1996)     | Evaluation of contractile reserve by dobutamine echocardiography: noninvasive estimation of the severity of heart failure. <i>Am Heart J</i> , 132(6), 1195-1201.     | Israel | 10 |      | atypical chest pain (no cardiac cause) | dobutamine                         | - 40 $\mu\text{g}/\text{kg}/\text{min}$<br>- 30 $\mu\text{g}/\text{kg}/\text{min}$<br>- 20 $\mu\text{g}/\text{kg}/\text{min}$<br>- 10 $\mu\text{g}/\text{kg}/\text{min}$<br>- 5 $\mu\text{g}/\text{kg}/\text{min}$<br>- 5 $\mu\text{g}/\text{kg}/\text{min}$ | Echo | HR, CO            | 4 different intensities<br><br>no age provided                        | 13/19 moderate |
| Blomstrand (1995) | Cardiovascular effects of dobutamine stress testing in healthy women. <i>Clinical cardiology</i> . 1995;18:659-663.                                                   | Sweden | 11 | 63   | female                                 | dobutamine                         | - 10 $\mu\text{g}/\text{kg}/\text{min}$<br>- 5 $\mu\text{g}/\text{kg}/\text{min}$                                                                                                                                                                            | Echo | HR, SV, CO        | 2 different intensities                                               | 11/17 high     |



Supplementary Material: Hemodynamic Changes during Stress Testing

|                |                                                                                                                                                                 |        |    |      |                  |                                                |                          |      |                       |                                                                                                  |                |
|----------------|-----------------------------------------------------------------------------------------------------------------------------------------------------------------|--------|----|------|------------------|------------------------------------------------|--------------------------|------|-----------------------|--------------------------------------------------------------------------------------------------|----------------|
| Weiner (2012)  | The impact of isometric handgrip testing on left ventricular twist mechanics. <i>J Physiol</i> , 590(20), 5141-5150.                                            | USA    | 18 | 29.7 | healthy controls | handgrip                                       | 40 % of MVC              | Echo | HR, SV, CO, EF        |                                                                                                  | 11/17 high     |
| Bozkurt (2006) | Echocardiographic findings in patients with Behcet's disease. <i>Am J Cardiol</i> , 97(5), 710-715.                                                             | Turkey | 50 | 35.7 | healthy controls | handgrip                                       | 50 % of MVC              | Echo | HR, EF                |                                                                                                  | 15/19 high     |
| Lev (1998)     | Exercise-induced aortic flow parameters in early postmenopausal women and middle-aged men. <i>J Intern Med</i> , 243(4), 275-280.                               | Israel | 15 | 55   | female           | - 2-hand bar dynamometer<br>- supine ergometer | - 50 % of MVC<br>- 50 W  | Echo | HR, SET, TTP          | 2 different stress types in 2 different cohorts: isometric vs. dynamic exercise in men vs. women | 12/19 moderate |
|                |                                                                                                                                                                 |        | 15 | 52   | male             | - 2-hand bar dynamometer<br>- supine ergometer | - 50 % of MVC<br>- 50 W  |      |                       |                                                                                                  |                |
| Fisman (1991)  | Pronounced reduction of aortic flow velocity and acceleration during heavy isometric exercise in coronary artery disease. <i>Am J Cardiol</i> , 68(5), 485-491. | Israel | 48 | 48   | male             | 2-hand bar dynamometer                         | 50 % of MVC              | Echo | HR, SVI, CI, SET, TTP |                                                                                                  | 14/19 high     |
| Bamrah (1991)  | Static versus dynamic exercise: effects on Doppler echocardiographic indices of left ventricular performance. <i>Clin Cardiol</i> , 14(6), 481-488.             | USA    | 12 | 60   | -                | - handgrip<br>- supine ergometer               | - 30 % of MVC<br>- 160 W | Echo | HR, SV, CO            | 2 different stress types in the same cohort: isometric vs. dynamic exercise                      | 10/19 moderate |

Supplementary Material: Hemodynamic Changes during Stress Testing

|                   |                                                                                                                                                |        |    |      |   |          |             |      |                 |  |             |
|-------------------|------------------------------------------------------------------------------------------------------------------------------------------------|--------|----|------|---|----------|-------------|------|-----------------|--|-------------|
| Krzeminski (1989) | Effect of endurance training on cardiovascular response to static exercise performed with untrained muscles. Int J Sports Med, 10(5), 363-367. | Poland | 18 | 20.9 | - | handgrip | 30 % of MVC | Echo | HR, SV, SET, EF |  | 9/17 medium |
|-------------------|------------------------------------------------------------------------------------------------------------------------------------------------|--------|----|------|---|----------|-------------|------|-----------------|--|-------------|

**Table S3.** Characteristics of the included studies for patients with aortic stenosis.

| Author                  | Publication                                                                                                                                                                        | Location | Number of Patients | Mean age (years) | Type of AS                                                                                     | Type of Stress Test  | Intensity of Stress  | Imaging Modality | Relevant Outcomes reported | Comments                                                                                                                                                                       | Quality        |
|-------------------------|------------------------------------------------------------------------------------------------------------------------------------------------------------------------------------|----------|--------------------|------------------|------------------------------------------------------------------------------------------------|----------------------|----------------------|------------------|----------------------------|--------------------------------------------------------------------------------------------------------------------------------------------------------------------------------|----------------|
| Pérez Del Villar (2017) | The Functional Significance of Paradoxical Low-Gradient Aortic Valve Stenosis: Hemodynamic Findings During Cardiopulmonary Exercise Testing. JACC Cardiovasc Imaging 10(1): 29-39. | Spain    | 20                 | 77               | paradoxical low-gradient, severe                                                               | semisupine ergometer | symptom-limited      | Echo             | HR, SVI, CI, SET           | Aortic valve area (AVA) <1cm <sup>2</sup> and <0.6cm <sup>2</sup> /m <sup>2</sup>                                                                                              | 9/17 moderate  |
| Lancellotti (2012)      | Determinants and prognostic significance of exercise pulmonary hypertension in asymptomatic severe aortic stenosis. Circulation, 126(7), 851-859.                                  | Belgium  | 105                | 71               | asymptomatic severe                                                                            | semisupine ergometer | symptom-limited      | Echo             | HR, EF                     | AVA <0.6cm <sup>2</sup> /m <sup>2</sup>                                                                                                                                        | 16/20 high     |
| Donal (January 2011)    | Impact of aortic stenosis on longitudinal myocardial deformation during exercise. Eur J Echocardiogr, 12(3), 235-241.                                                              | France   | 136<br>69          | 67<br>67         | asymptomatic, moderate to severe<br><br>- normal exercise test<br><br>- abnormal exercise test | semisupine ergometer | - 96 W<br><br>- 86 W | Echo             | HR, EF                     | AVA<1.2 or <1cm <sup>2</sup> and <0.6cm <sup>2</sup> /m <sup>2</sup><br><br>2 different cohorts: normal and abnormal exercise test<br><br>Study also included in healthy group | 15/17 moderate |

Supplementary Material: Hemodynamic Changes during Stress Testing

|                    |                                                                                                                                                                  |         |     |    |                        |                      |                       |      |            |                                                                                                             |                |
|--------------------|------------------------------------------------------------------------------------------------------------------------------------------------------------------|---------|-----|----|------------------------|----------------------|-----------------------|------|------------|-------------------------------------------------------------------------------------------------------------|----------------|
| Marechaux (2010)   | Usefulness of exercise-stress echocardiography for risk stratification of true asymptomatic patients with aortic valve stenosis. Eur Heart J, 31(11), 1390-1397. | Canada  | 135 | 64 | asymptomatic, moderate | semisupine ergometer | symptom-limited; 90 W | Echo | HR, SV, EF | AVA <1.5cm <sup>2</sup> or <0.9cm <sup>2</sup> /m <sup>2</sup>                                              | 13/18 high     |
| Lancellotti (2008) | Determinants of an abnormal response to exercise in patients with asymptomatic valvular aortic stenosis. Eur J Echocardiogr, 9(3), 338-343.                      | Belgium | 68  | 69 | asymptomatic, severe   | semisupine ergometer | symptom-limited       | Echo | HR, EF     | AVA <1cm <sup>2</sup><br><br>2 different cohorts: normal and abnormal exercise test                         | 12/17 high     |
| Legget (1996)      | Gender differences in left ventricular function at rest and with exercise in asymptomatic aortic stenosis. Am Heart J 131(1): 94-100.                            | USA     | 45  | 62 | asymptomatic, moderate | upright treadmill    | exhaustion            | Echo | HR, SV, CO | AVA ≤1.4cm <sup>2</sup> and ≤0.7cm <sup>2</sup> /m <sup>2</sup><br><br>2 different cohorts: male and female | 14/19 high     |
| Burwash (1994)     | Flow dependence of measures of aortic stenosis severity during exercise. Journal of the American College of Cardiology, 24(5), 1342-1350.                        | USA     | 66  |    | asymptomatic           | upright treadmill    | symptom-limited       | Echo | HR, SV, CO |                                                                                                             | 10/17 moderate |

Supplementary Material: Hemodynamic Changes during Stress Testing

|                |                                                                                                                                                                                                                                                |         |    |      |                                                     |                   |                                       |      |                 |                                                                |                   |
|----------------|------------------------------------------------------------------------------------------------------------------------------------------------------------------------------------------------------------------------------------------------|---------|----|------|-----------------------------------------------------|-------------------|---------------------------------------|------|-----------------|----------------------------------------------------------------|-------------------|
| Otto (1992)    | Physiologic changes with maximal exercise in asymptomatic valvular aortic stenosis assessed by Doppler echocardiography. J Am Coll Cardiol 20(5): 1160-1167.                                                                                   | USA     | 28 | 61   | asymptomatic                                        | upright treadmill | exhaustion                            | Echo | HR, SV, CO, SET |                                                                | 11/17<br>high     |
| Mahfouz (2015) | Left ventricular restrictive filling pattern and the presence of contractile reserve in patients with low-flow/low-gradient severe aortic stenosis. Echocardiography, 32(1), 65-70.                                                            | Egypt   | 14 | 51   | low-flow, low-gradient, severe, contractile reserve | dobutamine        | 11 $\mu\text{g}/\text{kg}/\text{min}$ | Echo | HR, SV, EF      | AVA<1cm <sup>2</sup>                                           | 13/19<br>moderate |
| Bartko (2013)  | Two-dimensional strain for the assessment of left ventricular function in low flow-low gradient aortic stenosis, relationship to hemodynamics, and outcome: a substudy of the multicenter TOPAS study. Circ Cardiovasc Imaging, 6(2), 268-276. | Austria | 47 | 73   | low-flow, low-gradient, moderate to severe          | dobutamine        | 20 $\mu\text{g}/\text{kg}/\text{min}$ | Echo | HR, SV, EF      | AVA $\leq 1.2\text{cm}^2$ and $\leq 0.6\text{cm}^2/\text{m}^2$ | 11/18<br>high     |
| Takeda (1999)  | The relation between transaortic pressure difference and flow during dobutamine stress echocardiography in patients with aortic stenosis. Heart, 82(1), 11-14.                                                                                 | UK      | 50 | 65.3 | asymptomatic, mild to severe                        | dobutamine        | 29 $\mu\text{g}/\text{kg}/\text{min}$ | Echo | HR, SV, CO      |                                                                | 12/17<br>high     |

Supplementary Material: Hemodynamic Changes during Stress Testing

|               |                                                                                                                                                                                                                                                                                                        |        |    |    |                              |            |                                                                    |                                |                 |                       |                |
|---------------|--------------------------------------------------------------------------------------------------------------------------------------------------------------------------------------------------------------------------------------------------------------------------------------------------------|--------|----|----|------------------------------|------------|--------------------------------------------------------------------|--------------------------------|-----------------|-----------------------|----------------|
| Lin (1998)    | Dobutamine stress Doppler hemodynamics in patients with aortic stenosis: feasibility, safety, and surgical correlations. Am Heart J, 136(6), 1010-1016.                                                                                                                                                | USA    | 27 | 74 | severe                       | dobutamine | 27 $\mu\text{g}/\text{kg}/\text{min}$                              | Echo                           | HR, SV, CO, EF  | AVA <1cm <sup>2</sup> | 16/18 high     |
| Tardif (1997) | Simultaneous determination of aortic valve area by the Gorlin formula and by transesophageal echocardiography under different transvalvular flow conditions. Evidence that anatomic aortic valve area does not change with variations in flow in aortic stenosis. J Am Coll Cardiol, 29(6), 1296-1302. | Canada | 11 | 63 | need for aortic valve repair | dobutamine | > 15% increase in CO;<br>5 - 20 $\mu\text{g}/\text{kg}/\text{min}$ | Transesophageal Echo           | HR, SV, CO, SET |                       | 10/17 moderate |
| Casale (1992) | Effects of dobutamine on Gorlin and continuity equation valve areas and valve resistance in valvular aortic stenosis. Am J Cardiol 1992;70:1175-9.                                                                                                                                                     | USA    | 12 | 81 | severe                       | dobutamine | 50 % increase in CO                                                | Echo & Cardiac Catheterization | HR, SV, CO, SET | AVA <1cm <sup>2</sup> | 10/17 moderate |
| Little (2007) | Impact of blood pressure on the Doppler echocardiographic assessment of severity of aortic stenosis. Heart, 93(7), 848-855.                                                                                                                                                                            | Canada | 22 | 70 | mild to severe               | handgrip   | 40 % of max. voluntary contraction                                 | Echo                           | HR, SV, CO      |                       | 11/17 high     |

**Table S4.** Characteristics of the included studies for patients with aortic coarctation.

| Author           | Publication                                                                                                                                                               | Location | Number of Patients | Mean age (years) | State of CoA                               | Type of Stress Test | Intensity of Stress                           | Imaging Modality          | Relevant Outcomes reported | Comments                                                               | Quality           |
|------------------|---------------------------------------------------------------------------------------------------------------------------------------------------------------------------|----------|--------------------|------------------|--------------------------------------------|---------------------|-----------------------------------------------|---------------------------|----------------------------|------------------------------------------------------------------------|-------------------|
| Pedersen (2010)  | Blood flow measured by magnetic resonance imaging at rest and exercise after surgical bypass of aortic arch obstruction. <i>Eur J Cardiothorac Surg</i> , 37(3), 658-661. | Denmark  | 7                  | 18               | bypass tube from Aorta asc. to Aorta desc. | supine ergometer    | - 0.5 W/kg<br>- 1 W/kg                        | MRI                       | CI                         | 2 different stress intensities<br><br>only median and ranges available | 12/19<br>moderate |
| Kimball (1986)   | Persistent ventricular adaptations in postoperative coarctation of the aorta. <i>J Am Coll Cardiol</i> , 8(1), 172-178.                                                   | Canada   | 25                 | 26.1             | surgical repair                            | supine exercise     | exhaustion                                    | Radio-nuclide Angiography | HR, EF, TTP                | TTP calculated                                                         | 12/19<br>moderate |
| Carpenter (1985) | Left ventricular hyperkinesia at rest and during exercise in normotensive patients 2 to 27 years after coarctation repair. <i>J Am Coll Cardiol</i> 6(4): 879-886.        | USA      | 32                 | 27               | surgical repair                            | supine ergometer    | exhaustion                                    | Echo and Angiography      | HR, EF                     | hyperdynamic left ventricle                                            | 12/19<br>moderate |
| Weber (1993)     | Discrepancies in aortic growth explain aortic arch gradients during exercise. <i>J Am Coll Cardiol</i> , 21(4), 1002-1007.                                                | USA      | 8                  | 12               | surgical repair                            | isoproterenol       | 0.05 - 0.1 $\mu\text{g}/\text{kg}/\text{min}$ | Angiography               | HR, CI                     |                                                                        | 10/17<br>moderate |

**Table S5.** Baseline characteristics for patients with aortic stenosis.

|                           | Dynamic exercise           |                                            | Pharmacological stress       |                                            | Isometric exercise      |                                            | Kruskal-Wallis-Test |
|---------------------------|----------------------------|--------------------------------------------|------------------------------|--------------------------------------------|-------------------------|--------------------------------------------|---------------------|
|                           |                            | Study arms reporting variable (N of tests) |                              | Study arms reporting variable (N of tests) |                         | Study arms reporting variable (N of tests) | P Value             |
| N of stress tests overall |                            | 11 (755)                                   |                              | 6 (161)                                    |                         | 1 (22)                                     |                     |
| Age, years                | 67 (64-69)                 | 10 (689)                                   | 69.2 (63-74)                 | 6 (161)                                    | 70 (70-70)              | 1 (22)                                     | 0.726               |
| Male, %                   | 64.4 (37-66.4)             | 8 (561)                                    | 64.1 (41.6-66.6)             | 6 (161)                                    | 73                      | 1 (22)                                     | 0.511               |
| BSA, m <sup>2</sup>       | 1.8 (1.8-1.8)              | 7 (533)                                    | 1.9 (1.9-1.9)                | 1 (47)                                     | 1.96 (1.96-1.96)        | 1 (22)                                     |                     |
| BMI, kg/m <sup>2</sup>    | 26.3 (26.1-27.8)           | 4 (223)                                    | N/A                          | -                                          | N/A                     | -                                          |                     |
| Resting HR, bpm           | 71 <sup>†</sup> (70-74)    | 11 (755)                                   | 75.5 <sup>†, ‡</sup> (72-76) | 6 (161)                                    | 62 <sup>‡</sup> (62-62) | 1 (22)                                     | 0.02*               |
| Resting SV, ml            | 90.5 <sup>†</sup> (83-103) | 6 (317)                                    | 55 <sup>†</sup> (51-59)      | 6 (161)                                    | 104 (104-104)           | 1 (22)                                     | 0.014*              |
| Resting CO, l/min         | 6.3 <sup>†</sup> (5.6-6.5) | 5 (182)                                    | 4.0 <sup>†</sup> (3.72-4.65) | 4 (100)                                    | 6.34 (6.34-6.34)        | 1 (22)                                     | 0.062               |
| Resting SET, ms           | 330.5 (328-333)            | 2 (48)                                     | 327.5 (305-350)              | 2 (23)                                     | N/A                     | -                                          | 0.999               |
| Light intensity, %        | N/A                        | -                                          | 7.5                          | 1 (12)                                     | 100                     | 1 (22)                                     |                     |
| Moderate intensity, %     | 27.2                       | 2 (205)                                    | 44.7                         | 3 (72)                                     | N/A                     | -                                          |                     |
| High intensity, %         | 72.8                       | 9 (550)                                    | 47.8                         | 2 (77)                                     | N/A                     | -                                          |                     |

Values are reported as median (interquartile ranges). BMI indicates body mass index; BSA, body surface area; HR, heart rate; SV, stroke volume; CO, cardiac output; SET, systolic ejection time. \* p<0.05 overall; † p<0.05 for pairwise comparison of dynamic exercise and pharmacological stress (Dunn's test); ‡ p<0.05 for pairwise comparison of pharmacological stress and isometric exercise (Dunn's test).



Supplementary Material: Hemodynamic Changes during Stress Testing

**Table S6.** Overview of pooled mean changes and 95% CIs of heart rate, stroke volume, cardiac output and systolic ejection time in healthy and patients with aortic stenosis.

|                        |                 | Heart Rate              |     | Stroke Volume           |     | Cardiac Output          |     | Systolic Ejection Time     |     |
|------------------------|-----------------|-------------------------|-----|-------------------------|-----|-------------------------|-----|----------------------------|-----|
|                        |                 | [bpm]                   |     | [ml]                    |     | [l/min]                 |     | [ms]                       |     |
|                        |                 | Mean change<br>(95% CI) | N   | Mean change<br>(95% CI) | N   | Mean change<br>(95% CI) | N   | Mean change<br>(95% CI)    | N   |
| <b>Healthy</b>         |                 |                         |     |                         |     |                         |     |                            |     |
| <b>Light</b>           | Dynamic         | 31.78<br>(27.82, 35.74) | 198 | 6.59<br>(2.58, 10.61)   | 122 | 2.68<br>(1.72, 3.64)    | 152 | -20.92<br>(-45.62, 3.78)   | 63  |
|                        | Dobu-<br>tamine | 13.71<br>(7.87, 19.56)  | 105 | 5.47<br>(0.3, 10.63)    | 75  | 1.54<br>(0.69, 2.38)    | 82  | N/A                        | -   |
|                        | Isometric       | 18.44<br>(10.74, 26.14) | 229 | -4.17<br>(-14.37, 6.03) | 101 | 0.82<br>(-0.26, 1.9)    | 83  | -0.38<br>(-19.07, 18.32)   | 96  |
| <b>Mode-<br/>rate</b>  | Dynamic         | 49.57<br>(40.03, 59.1)  | 271 | 11.64<br>(5.87, 17.42)  | 181 | 4.67<br>(3.5, 5.84)     | 240 | -51.59<br>(-100.58, -2.61) | 33  |
|                        | Dobu-<br>tamine | 42.83<br>(36.94, 48.72) | 205 | 6.29<br>(-2.0, 14.58)   | 101 | 4.42<br>(3.65, 5.19)    | 133 | N/A                        | -   |
| <b>High</b>            | Dynamic         | 89.31<br>(81.46, 97.17) | 787 | 21.31<br>(13.42, 29.21) | 463 | 10.45<br>(8.04, 12.85)  | 445 | -77.83<br>(-95.88, -59.78) | 111 |
|                        | Dobu-<br>tamine | 53.58<br>(36.53, 70.64) | 135 | 0.98<br>(-9.32, 11.27)  | 55  | 4.98<br>(2.94, 7.01)    | 62  | -90.0<br>(-103.71,-76.29)  | 20  |
| <b>Aortic stenosis</b> |                 |                         |     |                         |     |                         |     |                            |     |
| <b>Light</b>           | Dynamic         | N/A                     | -   | N/A                     | -   | N/A                     | -   | N/A                        | -   |
|                        | Dobu-<br>tamine | 14.0<br>(9.82, 18.18)   | 12  | 8.0<br>(3.82, 12.18)    | 12  | 1.33<br>(1.11, 1.55)    | 12  | -41<br>(-52.29, -29.71)    | 12  |
|                        | Isometric       | 5.0<br>(-1.17, 11.17)   | 22  | -4.0<br>(-16.43, 8.43)  | 22  | 0.21<br>(-0.64, 1.06)   | 22  | N/A                        | -   |
| <b>Mode-<br/>rate</b>  | Dynamic         | 46.45<br>(42.63, 50.27) | 205 | N/A                     | -   | N/A                     | -   | N/A                        | -   |
|                        | Dobu-<br>tamine | 18.66<br>(2.38, 34.93)  | 72  | 13.11<br>(7.99, 18.23)  | 72  | 1.7<br>(0.74, 2.66)     | 11  | -40<br>(-45.33, -34.67)    | 11  |
| <b>High</b>            | Dynamic         | 55.32<br>(47.31, 63.33) | 550 | -0.96<br>(-5.27, 3.35)  | 317 | 5.3<br>(3.46, 7.14)     | 162 | -58.94<br>(-127.52, 9.63)  | 48  |
|                        | Dobu-<br>tamine | 42.52<br>(32.77, 52.28) | 77  | 14.06<br>(-1.62, 29.74) | 77  | 3.92<br>(2.45, 5.39)    | 77  | N/A                        | -   |

N indicates number of stress examinations included into analysis; bpm, beats per minute; ml, milliliter, l/min, liters per minute; ms, milliseconds; N/A, no data available.

Supplementary Material: Hemodynamic Changes during Stress Testing

**Table S7.** Multivariate meta-regression analysis for potential variables impacting heterogeneity of HR change.

| <b>HR Change</b>                                                    | <b>Multivariable Estimate</b> | <b>95% CI</b>     | <b>P value</b> |
|---------------------------------------------------------------------|-------------------------------|-------------------|----------------|
| Type of Intervention (dynamic, pharmacological or isometric stress) | -5.08                         | -11.924 to 1.745  | 0.143          |
| Intensity Level (light, moderate, high)                             | 28.6                          | 23.459 to 33.705  | <0.001         |
| Athlete (yes/no)                                                    | 10.6                          | -3.265 to 24.467  | 0.133          |
| Disease Condition (healthy, CoA or AS)                              | -4.83                         | -12.611 to 2.952  | 0.221          |
| Mean Age (years)                                                    | -0.297                        | -0.543 to -0.0503 | 0.019          |

Number of observations: 122; Between-study variance:  $T^2=104.5$ , Residual variation due to heterogeneity:  $I^2$  residual=20.11%; Proportion of between study variance explained: Adjusted  $R^2=86.13\%$ ; Model Fit for all five covariates: 43.41;  $p<0.000$ .

**Table S8.** Modified version of the Downs and Black checklist.

| Author          | Publication                                                                                                                                            | Reporting |   |   |   |   |   |   |   |   |    | External validity |    |    | Internal validity - bias |    |    |    |    |    |    |    | Internal validity - confounding |    |    |    |    |    | P. |
|-----------------|--------------------------------------------------------------------------------------------------------------------------------------------------------|-----------|---|---|---|---|---|---|---|---|----|-------------------|----|----|--------------------------|----|----|----|----|----|----|----|---------------------------------|----|----|----|----|----|----|
|                 |                                                                                                                                                        | 1         | 2 | 3 | 4 | 5 | 6 | 7 | 8 | 9 | 10 | 11                | 12 | 13 | 14                       | 15 | 16 | 17 | 18 | 19 | 20 | 21 | 22                              | 23 | 24 | 25 | 26 | 27 |    |
| Barber (2016)   | Magnetic Resonance-Augmented Cardiopulmonary Exercise Testing: Comprehensively Assessing Exercise Intolerance in Children With Cardiovascular Disease. | 1         | 1 | 1 | 1 | 2 | 1 | 1 | 1 |   | 1  | 0                 | 0  | 1  |                          |    | 1  |    |    | 1  | 1  | 0  | 1                               |    |    | 1  |    | 0  |    |
| Roberts (2015)  | Real-time aortic pulse wave velocity measurement during exercise stress testing.                                                                       | 1         | 1 | 1 | 1 |   | 1 | 1 | 0 |   | 1  | 0                 | 0  | 1  |                          |    | 1  |    |    | 1  | 0  | 0  | 0                               |    |    |    |    | 0  |    |
| Forouzan (2015) | Non-invasive measurement using cardiovascular magnetic resonance of changes in pulmonary artery stiffness with exercise.                               | 1         | 1 | 0 | 1 |   | 1 | 1 | 0 |   | 0  | 0                 | 0  | 1  |                          |    | 1  |    |    | 1  | 1  | 0  | 0                               |    |    |    |    | 0  |    |
| Claessen (2015) | Pulmonary vascular and right ventricular reserve in patients with normalized resting hemodynamics after pulmonary endarterectomy                       | 1         | 1 | 1 | 1 | 2 | 1 | 1 | 0 |   | 1  | 0                 | 0  | 1  |                          |    | 1  |    |    | 1  | 1  | 1  | 0                               |    |    | 0  |    | 0  |    |
| Barber (2015)   | MR augmented cardiopulmonary exercise testing-a novel approach to assessing cardiovascular function.                                                   | 1         | 1 | 1 | 1 |   | 1 | 1 | 0 |   | 1  | 0                 | 0  | 1  |                          |    | 1  |    |    | 0  | 0  | 1  | 1                               |    |    |    |    | 0  |    |

Supplementary Material: Hemodynamic Changes during Stress Testing

|                          |                                                                                                                                                                                      |   |   |   |   |   |   |   |   |  |   |   |   |   |  |   |  |   |   |   |   |  |  |   |  |   |
|--------------------------|--------------------------------------------------------------------------------------------------------------------------------------------------------------------------------------|---|---|---|---|---|---|---|---|--|---|---|---|---|--|---|--|---|---|---|---|--|--|---|--|---|
| Steding-Ehrenborg (2013) | Moderate intensity supine exercise causes decreased cardiac volumes and increased outer volume variations: a cardiovascular magnetic resonance study                                 | 1 | 1 | 0 | 1 |   | 1 | 1 | 0 |  | 0 | 0 | 0 | 1 |  | 1 |  | 1 | 1 | 0 | 0 |  |  |   |  | 0 |
| Weber (2011)             | High-resolution phase-contrast MRI of aortic and pulmonary blood flow during rest and physical exercise using a MRI compatible bicycle ergometer.                                    | 1 | 1 | 1 | 1 |   | 1 | 1 | 0 |  | 1 | 0 | 0 | 1 |  | 1 |  | 1 | 0 | 0 | 0 |  |  |   |  | 1 |
| Puntawangkoon (2009)     | Reduced peripheral arterial blood flow with preserved cardiac output during submaximal bicycle exercise in elderly heart failure                                                     | 1 | 1 | 1 | 1 | 2 | 1 | 1 | 1 |  | 1 | 0 | 0 | 1 |  | 1 |  | 1 | 1 | 0 | 0 |  |  | 1 |  | 0 |
| Roest (March 2001)       | Biventricular response to supine physical exercise in young adults assessed with ultrafast magnetic resonance imaging                                                                | 1 | 1 | 0 | 1 |   | 1 | 1 | 0 |  | 0 | 0 | 0 | 1 |  | 1 |  | 1 | 1 | 0 | 0 |  |  |   |  | 0 |
| Roest (November 2001)    | Prolonged cardiac recovery from exercise in asymptomatic adults late after atrial correction of transposition of the great arteries: evaluation with magnetic resonance flow mapping | 1 | 1 | 0 | 1 | 2 | 1 | 1 | 0 |  | 0 | 0 | 0 | 1 |  | 1 |  | 1 | 1 | 0 | 0 |  |  | 1 |  | 0 |
| Niezen (1998)            | Measurement of aortic and pulmonary flow with MRI at rest and during physical exercise.                                                                                              | 1 | 1 | 0 | 1 |   | 1 | 1 | 0 |  | 0 | 0 | 0 | 1 |  | 1 |  | 0 | 0 | 0 | 0 |  |  |   |  | 0 |
| Stephensen (2016)        | Changes in blood volume shunting in patients with atrial septal defects: Assessment of heart function with cardiovascular magnetic resonance during dobutamine stress                | 1 | 1 | 1 | 1 | 2 | 1 | 1 | 0 |  | 0 | 0 | 0 | 1 |  | 1 |  | 0 | 1 | 0 | 0 |  |  | 1 |  | 0 |

Supplementary Material: Hemodynamic Changes during Stress Testing

|                   |                                                                                                                                                                           |   |   |   |   |   |   |   |   |  |   |   |   |   |  |  |   |  |  |   |   |   |   |  |  |   |  |   |
|-------------------|---------------------------------------------------------------------------------------------------------------------------------------------------------------------------|---|---|---|---|---|---|---|---|--|---|---|---|---|--|--|---|--|--|---|---|---|---|--|--|---|--|---|
| Pingitore (2013)  | Influence of preload and afterload on stroke volume response to low-dose dobutamine stress in patients with non-ischemic heart failure: a cardiac MR study                | 1 | 1 | 1 | 1 | 2 | 1 | 1 | 1 |  | 1 | 0 | 0 | 1 |  |  | 1 |  |  | 1 | 1 | 0 | 0 |  |  | 0 |  | 0 |
| Ahtarovski (2013) | Termination of dobutamine infusion causes transient rebound left heart diastolic dysfunction in healthy elderly women but not in men: a cardiac magnetic resonance study. | 1 | 1 | 0 | 1 | 2 | 1 | 1 | 0 |  | 1 | 0 | 0 | 1 |  |  | 1 |  |  | 1 | 0 | 0 | 0 |  |  | 1 |  | 0 |
| Ahtarovski (2012) | Left atrial and ventricular function during dobutamine and glycopyrrolate stress in healthy young and elderly as evaluated by cardiac magnetic resonance.                 | 1 | 1 | 1 | 1 | 2 | 1 | 1 | 0 |  | 1 | 0 | 0 | 1 |  |  | 1 |  |  | 1 | 0 | 0 | 0 |  |  | 1 |  | 0 |
| Schuster (2011)   | Cardiovascular magnetic resonance myocardial feature tracking detects quantitative wall motion during dobutamine stress."                                                 | 1 | 1 | 0 | 1 |   | 1 | 1 | 1 |  | 0 | 0 | 0 | 1 |  |  | 1 |  |  | 1 | 0 | 0 | 0 |  |  |   |  | 0 |
| Manda-paka (2011) | Simultaneous measurement of left and right ventricular volumes and ejection fraction during dobutamine stress cardiovascular magnetic resonance.                          | 1 | 1 | 0 | 1 |   | 1 | 1 | 0 |  | 1 | 0 | 0 | 1 |  |  | 1 |  |  | 1 | 1 | 0 | 0 |  |  |   |  | 0 |
| Oosterhof (2005)  | Disparity between dobutamine stress and physical exercise magnetic resonance imaging in patients with an intra-atrial correction for transposition of the great arteries. | 1 | 1 | 1 | 1 | 2 | 1 | 1 | 0 |  | 1 | 0 | 0 | 1 |  |  | 1 |  |  | 0 | 0 | 0 | 0 |  |  | 0 |  | 0 |

Supplementary Material: Hemodynamic Changes during Stress Testing

|                                 |                                                                                                                                                                   |   |   |   |   |   |   |   |   |  |   |   |   |   |  |  |   |  |  |   |   |   |   |  |  |   |  |   |
|---------------------------------|-------------------------------------------------------------------------------------------------------------------------------------------------------------------|---|---|---|---|---|---|---|---|--|---|---|---|---|--|--|---|--|--|---|---|---|---|--|--|---|--|---|
| Dodge-Khatami (2002)            | Comparable systemic ventricular function in healthy adults and patients with unoperated congenitally corrected transposition using MRI dobutamine stress testing. | 1 | 1 | 0 | 1 | 1 | 1 | 1 | 0 |  | 0 | 0 | 0 | 1 |  |  | 1 |  |  | 1 | 1 | 0 | 0 |  |  | 0 |  | 0 |
| Pennell (1995)                  | Assessment of magnetic resonance velocity mapping of global ventricular function during dobutamine infusion in coronary artery disease.                           | 1 | 1 | 0 | 1 | 1 | 1 | 1 | 0 |  | 1 | 0 | 0 | 1 |  |  | 1 |  |  | 1 | 0 | 1 | 0 |  |  | 1 |  | 0 |
| van Ruge (1993)                 | Quantitation of global and regional left ventricular function by cine magnetic resonance imaging during dobutamine stress in normal human subjects.               | 1 | 1 | 1 | 1 |   | 1 | 1 | 1 |  | 0 | 0 | 0 | 1 |  |  | 1 |  |  | 1 | 0 | 0 | 0 |  |  |   |  | 0 |
| Knobelsdorff-Brenkenhoff (2013) | Isometric handgrip exercise during cardiovascular magnetic resonance imaging: set-up and cardiovascular effects.                                                  | 1 | 1 | 1 | 1 |   | 1 | 1 | 0 |  | 1 | 0 | 0 | 1 |  |  | 1 |  |  | 1 | 0 | 0 | 0 |  |  |   |  | 0 |
| D'Alto (2017)                   | Echocardiographic assessment of right ventricular contractile reserve in healthy subjects.                                                                        | 1 | 1 | 1 | 1 |   | 1 | 1 | 0 |  | 1 | 0 | 0 | 1 |  |  | 1 |  |  | 1 | 0 | 0 | 0 |  |  |   |  | 0 |
| D'Andrea (2016)                 | Right atrial morphology and function in patients with systemic sclerosis compared to healthy controls: a two-dimensional strain study.                            | 1 | 1 | 1 | 1 | 2 | 1 | 1 | 0 |  | 0 | 0 | 0 | 1 |  |  | 1 |  |  | 1 | 1 | 1 | 0 |  |  | 1 |  | 0 |
| Wang (2014)                     | Changes of ventricular and peripheral performance in patients with heart failure and normal ejection fraction: insights from ergometry stress echocardiography.   | 1 | 1 | 1 | 1 | 2 | 1 | 1 | 0 |  | 1 | 0 | 0 | 1 |  |  | 1 |  |  | 0 | 0 | 1 | 0 |  |  | 1 |  | 1 |

Supplementary Material: Hemodynamic Changes during Stress Testing

|                  |                                                                                                                                                                                                                           |   |   |   |   |   |   |   |   |  |   |   |   |   |  |  |   |  |  |   |   |   |   |  |  |   |   |  |   |   |
|------------------|---------------------------------------------------------------------------------------------------------------------------------------------------------------------------------------------------------------------------|---|---|---|---|---|---|---|---|--|---|---|---|---|--|--|---|--|--|---|---|---|---|--|--|---|---|--|---|---|
| Khouri (2014)    | Utility of 3-dimensional echocardiography, global longitudinal strain, and exercise stress echocardiography to detect cardiac dysfunction in breast cancer patients treated with doxorubicin-containing adjuvant therapy. | 1 | 1 | 1 | 1 | 2 | 1 | 1 | 0 |  | 1 | 0 | 0 | 1 |  |  | 1 |  |  | 1 | 0 | 1 | 1 |  |  | 1 |   |  | 0 |   |
| Tan (2013)       | Exercise-induced torsional dyssynchrony relates to impaired functional capacity in patients with heart failure and normal ejection fraction                                                                               | 1 | 1 | 1 | 1 | 2 | 1 | 1 | 0 |  | 1 | 1 | 0 | 1 |  |  | 1 |  |  | 0 | 1 | 1 | 0 |  |  |   | 0 |  |   | 0 |
| Klasnja (2013)   | Cardiac power output and its response to exercise in athletes and non-athletes                                                                                                                                            | 1 | 1 | 0 | 1 | 2 | 1 | 1 | 0 |  | 0 | 0 | 0 | 1 |  |  | 1 |  |  | 1 | 0 | 0 | 0 |  |  |   | 1 |  |   | 0 |
| Henein (2013)    | Impaired left ventricular systolic function reserve limits cardiac output and exercise capacity in HFpEF patients due to systemic hypertension                                                                            | 1 | 1 | 1 | 1 | 2 | 1 | 1 | 1 |  | 0 | 1 | 0 | 1 |  |  | 1 |  |  | 1 | 1 | 0 | 0 |  |  |   | 1 |  |   | 0 |
| Lee (2012)       | Exercise with a twist: left ventricular twist and recoil in healthy young and middle-aged men, and middle-aged endurance-trained men                                                                                      | 1 | 1 | 1 | 1 | 2 | 1 | 1 | 0 |  | 0 | 0 | 0 | 1 |  |  | 1 |  |  | 1 | 0 | 0 | 0 |  |  |   | 0 |  |   | 0 |
| La Gerche (2012) | Maximal oxygen consumption is best predicted by measures of cardiac size rather than function in healthy adults                                                                                                           | 1 | 1 | 0 | 1 |   | 1 | 1 | 0 |  | 1 | 0 | 0 | 1 |  |  | 1 |  |  | 1 | 1 | 0 | 0 |  |  |   |   |  |   | 0 |
| Cheung (2012)    | Dynamic dyssynchrony and impaired contractile reserve of the left ventricle in beta-thalassaemia major: an exercise echocardiographic study.                                                                              | 1 | 1 | 0 | 1 | 2 | 1 | 1 | 0 |  | 1 | 0 | 0 | 1 |  |  | 1 |  |  | 1 | 1 | 1 | 0 |  |  |   | 1 |  |   | 0 |

Supplementary Material: Hemodynamic Changes during Stress Testing

|                      |                                                                                                                                                      |   |   |   |   |   |   |   |   |  |   |   |   |   |  |  |   |  |  |   |   |   |   |  |  |  |   |   |
|----------------------|------------------------------------------------------------------------------------------------------------------------------------------------------|---|---|---|---|---|---|---|---|--|---|---|---|---|--|--|---|--|--|---|---|---|---|--|--|--|---|---|
| Donal (January 2011) | Impact of aortic stenosis on longitudinal myocardial deformation during exercise.                                                                    | 1 | 1 | 1 | 1 | 2 | 1 | 1 | 1 |  | 1 | 0 | 0 | 1 |  |  | 1 |  |  | 1 | 1 | 0 | 1 |  |  |  |   | 0 |
| Donal (May 2011)     | Comparison of the heart function adaptation in trained and sedentary men after 50 and before 35 years of age                                         | 1 | 1 | 1 | 1 | 2 | 1 | 1 | 0 |  | 0 | 0 | 0 | 1 |  |  | 1 |  |  | 1 | 1 | 0 | 0 |  |  |  | 1 | 0 |
| Bombardi-ni (2011)   | Abnormal shortened diastolic time length at increasing heart rates in patients with abnormal exercise-induced increase in pulmonary artery pressure. | 1 | 1 | 1 | 1 | 2 | 1 | 1 | 1 |  | 0 | 0 | 0 | 1 |  |  | 1 |  |  | 1 | 1 | 1 | 0 |  |  |  | 0 | 0 |
| Dini (2010)          | Peak power output to left ventricular mass: an index to predict ventricular pumping performance and morbidity in advanced heart failure              | 1 | 1 | 1 | 1 | 2 | 1 | 1 | 1 |  | 1 | 0 | 0 | 1 |  |  | 1 |  |  | 1 | 0 | 1 | 0 |  |  |  | 0 | 0 |
| Argiento (2010)      | Exercise stress echocardiography for the study of the pulmonary circulation                                                                          | 1 | 1 | 1 | 1 |   | 1 | 1 | 0 |  | 0 | 0 | 0 | 1 |  |  | 1 |  |  | 1 | 0 | 0 | 0 |  |  |  |   | 0 |
| Schuster (2009)      | Cardiac function during exercise in obese prepubertal boys: effect of degree of obesity                                                              | 1 | 1 | 1 | 1 | 2 | 1 | 1 | 0 |  | 0 | 0 | 0 | 1 |  |  | 1 |  |  | 1 | 1 | 1 | 0 |  |  |  | 1 | 0 |
| Goodman (2009)       | Left ventricular contractile function is preserved during prolonged exercise in middle-aged men                                                      | 1 | 1 | 1 | 1 |   | 1 | 1 | 0 |  | 0 | 0 | 0 | 1 |  |  | 1 |  |  | 1 | 0 | 1 | 0 |  |  |  |   | 0 |
| Cotrim (2008)        | Do healthy individuals develop intraventricular gradients during exertion?                                                                           | 1 | 1 | 1 | 1 |   | 1 | 1 | 1 |  | 0 | 0 | 0 | 1 |  |  | 1 |  |  | 1 | 1 | 0 | 0 |  |  |  |   | 0 |
| Bombardi-ni (2008)   | Diastolic time - frequency relation in the stress echo lab: filling timing and flow at different heart rates.                                        | 1 | 1 | 1 | 1 |   | 1 | 1 | 1 |  | 0 | 0 | 0 | 1 |  |  | 1 |  |  | 1 | 1 | 0 | 0 |  |  |  |   | 0 |



Supplementary Material: Hemodynamic Changes during Stress Testing

|                 |                                                                                                                                                               |   |   |   |   |   |   |   |   |  |   |   |   |   |  |  |   |  |  |   |   |   |   |  |  |   |  |   |
|-----------------|---------------------------------------------------------------------------------------------------------------------------------------------------------------|---|---|---|---|---|---|---|---|--|---|---|---|---|--|--|---|--|--|---|---|---|---|--|--|---|--|---|
| De Souza (2007) | A stress echocardiography study of cardiac function during progressive exercise in pediatric oncology patients treated with anthracyclines.                   | 1 | 1 | 1 | 1 | 2 | 1 | 1 |   |  | 0 | 0 | 0 | 1 |  |  | 1 |  |  | 0 | 0 | 1 | 1 |  |  | 0 |  | 0 |
| Rowland (2005)  | Effect of pectus excavatum deformity on cardiorespiratory fitness in adolescent boys.                                                                         | 1 | 1 | 0 | 1 | 2 | 1 | 1 | 0 |  | 0 | 0 | 0 | 1 |  |  | 1 |  |  | 1 | 1 | 0 | 0 |  |  | 1 |  | 0 |
| Sagiv (2000)    | Left ventricular contractility and function at peak aerobic and anaerobic exercises.                                                                          | 1 | 1 | 1 | 1 |   | 1 | 1 | 1 |  | 0 | 0 | 0 | 1 |  |  | 1 |  |  | 1 | 1 | 1 | 0 |  |  |   |  | 0 |
| Auerbach (1999) | Attenuated responses of Doppler-derived hemodynamic parameters during supine bicycle exercise in heart transplant recipients.                                 | 1 | 1 | 0 | 1 | 2 | 1 | 1 | 0 |  | 1 | 0 | 0 | 1 |  |  | 1 |  |  | 1 | 0 | 0 | 0 |  |  | 0 |  | 0 |
| Fisman (1990)   | Altered left ventricular volume and ejection fraction responses to supine dynamic exercise in athletes.                                                       | 1 | 1 | 1 | 1 | 2 | 1 | 1 | 1 |  | 1 | 0 | 0 | 1 |  |  | 1 |  |  | 1 | 1 | 1 | 0 |  |  | 1 |  | 0 |
| Ginzton (1989)  | Effect of long-term high intensity aerobic training on left ventricular volume during maximal upright exercise.                                               | 1 | 1 | 1 | 1 | 1 | 1 | 1 | 0 |  | 0 | 0 | 0 | 1 |  |  | 1 |  |  | 1 | 1 | 1 | 0 |  |  | 0 |  | 0 |
| Thompson (1987) | Comparison of ventricular volumes in normal and post-myocardial infarction subjects.                                                                          | 1 | 1 | 1 | 1 | 1 | 1 | 1 | 1 |  | 0 | 0 | 0 | 1 |  |  | 1 |  |  | 0 | 1 | 0 | 0 |  |  | 1 |  | 0 |
| Mehdirad (1987) | Evaluation of left ventricular function during upright exercise: correlation of exercise Doppler with postexercise two-dimensional echocardiographic results. | 1 | 1 | 1 | 1 | 1 | 1 | 1 | 1 |  | 0 | 0 | 0 | 1 |  |  | 1 |  |  | 1 | 1 | 0 | 0 |  |  | 0 |  | 0 |
| Gardin (1986)   | Studies of Doppler aortic flow velocity during supine bicycle exercise.                                                                                       | 1 | 1 | 1 | 1 |   | 1 | 1 | 1 |  | 0 | 0 | 0 | 1 |  |  | 1 |  |  | 1 | 0 | 0 | 0 |  |  |   |  | 0 |

Supplementary Material: Hemodynamic Changes during Stress Testing

|               |                                                                                                                                  |   |   |   |   |   |   |   |   |  |   |   |   |   |  |  |   |  |  |   |   |   |   |  |  |   |  |   |
|---------------|----------------------------------------------------------------------------------------------------------------------------------|---|---|---|---|---|---|---|---|--|---|---|---|---|--|--|---|--|--|---|---|---|---|--|--|---|--|---|
| Bryg (1986)   | Effect of coronary artery disease on Doppler-derived parameters of aortic flow during upright exercise                           | 1 | 1 | 0 | 1 | 1 | 1 | 1 | 1 |  | 0 | 0 | 0 | 1 |  |  | 1 |  |  | 1 | 1 | 0 | 0 |  |  | 0 |  | 0 |
| Lau (2014)    | Dobutamine stress echocardiography for the assessment of pressure-flow relationships of the pulmonary circulation                | 1 | 1 | 1 | 1 | 2 | 1 | 1 | 0 |  | 1 | 0 | 0 | 1 |  |  | 1 |  |  | 1 | 1 | 0 | 0 |  |  | 1 |  | 0 |
| Maras (2013)  | Patterns of cardiac dysfunction coinciding with exertional breathlessness in hypertrophic cardiomyopathy                         | 1 | 1 | 1 | 1 | 1 | 1 | 1 | 1 |  | 0 | 0 | 0 | 1 |  |  | 1 |  |  | 1 | 0 | 0 | 0 |  |  | 0 |  | 0 |
| Brili (2007)  | Dobutamine stress echocardiography for the evaluation of cardiac reserve late after Fontan operation                             | 1 | 1 | 0 | 1 | 1 | 1 | 1 | 1 |  | 1 | 0 | 0 | 1 |  |  | 1 |  |  | 1 | 0 | 1 | 0 |  |  | 1 |  | 0 |
| Arshad (2004) | Systole-diastole mismatch in hypertrophic cardiomyopathy is caused by stress induced left ventricular outflow tract obstruction. | 1 | 1 | 0 | 1 | 2 | 1 | 1 | 1 |  | 0 | 0 | 0 | 1 |  |  | 1 |  |  | 1 | 0 | 0 | 0 |  |  | 0 |  | 0 |
| Cnota (2003)  | Cardiovascular physiology during supine cycle ergometry and dobutamine stress.                                                   | 1 | 1 | 1 | 1 |   | 1 | 1 | 1 |  | 1 | 0 | 0 | 1 |  |  | 1 |  |  | 0 | 0 | 0 | 0 |  |  |   |  | 0 |
| Duncan (2001) | Long axis electromechanics during dobutamine stress in patients with coronary artery disease and left ventricular dysfunction    | 1 | 1 | 1 | 1 | 2 | 1 | 1 | 1 |  | 0 | 0 | 0 | 1 |  |  | 1 |  |  | 1 | 1 | 0 | 0 |  |  | 0 |  | 0 |
| Marmor (1996) | Evaluation of contractile reserve by dobutamine echocardiography: noninvasive estimation of the severity of heart failure.       | 1 | 1 | 1 | 1 | 0 | 1 | 1 | 1 |  | 1 | 1 | 0 | 1 |  |  | 1 |  |  | 0 | 1 | 1 | 0 |  |  | 0 |  | 0 |

Supplementary Material: Hemodynamic Changes during Stress Testing

|                   |                                                                                                                           |   |   |   |   |   |   |   |   |  |   |   |   |   |  |  |   |  |  |   |   |   |   |  |  |   |  |   |
|-------------------|---------------------------------------------------------------------------------------------------------------------------|---|---|---|---|---|---|---|---|--|---|---|---|---|--|--|---|--|--|---|---|---|---|--|--|---|--|---|
| Blomstrand (1995) | Cardiovascular effects of dobutamine stress testing in healthy women.                                                     | 1 | 1 | 1 | 1 |   | 1 | 1 | 1 |  | 0 | 1 | 0 | 1 |  |  | 1 |  |  | 1 | 0 | 0 | 0 |  |  |   |  | 0 |
| Weiner (2012)     | The impact of isometric handgrip testing on left ventricular twist mechanics.                                             | 1 | 1 | 1 | 1 |   | 1 | 1 | 1 |  | 1 | 0 | 0 | 1 |  |  | 1 |  |  | 0 | 0 | 1 | 0 |  |  |   |  | 0 |
| Bozkurt (2006)    | Echocardiographic findings in patients with Behcet's disease.                                                             | 1 | 1 | 1 | 1 | 2 | 1 | 1 | 0 |  | 1 | 0 | 0 | 1 |  |  | 1 |  |  | 1 | 1 | 1 | 0 |  |  | 1 |  | 0 |
| Lev (1998)        | Exercise-induced aortic flow parameters in early postmenopausal women and middle-aged men.                                | 1 | 1 | 1 | 1 | 1 | 1 | 1 | 0 |  | 0 | 1 | 0 | 1 |  |  | 1 |  |  | 1 | 0 | 1 | 0 |  |  | 0 |  | 0 |
| Fisman (1991)     | Pronounced reduction of aortic flow velocity and acceleration during heavy isometric exercise in coronary artery disease. | 1 | 1 | 1 | 1 | 1 | 1 | 1 | 1 |  | 0 | 0 | 0 | 1 |  |  | 1 |  |  | 1 | 1 | 1 | 0 |  |  | 1 |  | 1 |
| Bamrah (1991)     | Static versus dynamic exercise: effects on Doppler echocardiographic indices of left ventricular performance.             | 1 | 1 | 1 | 1 | 0 | 1 | 1 | 1 |  | 0 | 0 | 0 | 1 |  |  | 1 |  |  | 1 | 0 | 0 | 0 |  |  | 0 |  | 0 |
| Krzeminski (1989) | Effect of endurance training on cardiovascular response to static exercise performed with untrained muscles.              | 1 | 1 | 0 | 1 |   | 1 | 1 | 0 |  | 1 | 0 | 0 | 1 |  |  | 1 |  |  | 1 | 0 | 0 | 0 |  |  |   |  | 0 |

Supplementary Material: Hemodynamic Changes during Stress Testing

| Aortic Stenosis         |                                                                                                                                                     |   |   |   |   |   |   |   |   |   |   |   |   |   |  |  |   |  |  |   |   |   |   |  |  |  |   |   |   |
|-------------------------|-----------------------------------------------------------------------------------------------------------------------------------------------------|---|---|---|---|---|---|---|---|---|---|---|---|---|--|--|---|--|--|---|---|---|---|--|--|--|---|---|---|
| Pérez Del Villar (2017) | The Functional Significance of Paradoxical Low-Gradient Aortic Valve Stenosis: Hemodynamic Findings During Cardiopulmonary Exercise Testing.        | 1 | 1 | 1 | 1 |   | 1 | 1 | 0 |   | 0 | 0 | 0 | 1 |  |  | 1 |  |  | 1 | 0 | 0 | 0 |  |  |  |   | 0 |   |
| Lancellotti (2012)      | Determinants and prognostic significance of exercise pulmonary hypertension in asymptomatic severe aortic stenosis.                                 | 1 | 1 | 1 | 1 | 2 | 1 | 1 | 1 | 1 | 1 | 0 | 0 | 1 |  |  | 1 |  |  | 1 | 0 | 1 | 0 |  |  |  | 1 |   | 0 |
| Marechaux (2010)        | Usefulness of exercise-stress echocardiography for risk stratification of true asymptomatic patients with aortic valve stenosis.                    | 1 | 1 | 1 | 1 |   | 1 | 1 | 1 | 1 | 1 | 0 | 0 | 1 |  |  | 1 |  |  | 1 | 0 | 1 | 0 |  |  |  |   |   | 0 |
| Lancellotti (2008)      | Determinants of an abnormal response to exercise in patients with asymptomatic valvular aortic stenosis.                                            | 1 | 1 | 1 | 1 |   | 1 | 1 | 1 |   | 1 | 0 | 0 | 1 |  |  | 1 |  |  | 1 | 1 | 0 | 0 |  |  |  |   |   | 0 |
| Legget (1996)           | Gender differences in left ventricular function at rest and with exercise in asymptomatic aortic stenosis.                                          | 1 | 1 | 1 | 1 | 2 | 1 | 1 | 0 |   | 1 | 0 | 0 | 1 |  |  | 1 |  |  | 0 | 1 | 0 | 1 |  |  |  | 1 |   | 0 |
| Burwash (1994)          | Flow dependence of measures of aortic stenosis severity during exercise.                                                                            | 1 | 1 | 1 | 1 |   | 1 | 1 | 0 |   | 1 | 0 | 0 | 1 |  |  | 1 |  |  | 1 | 0 | 0 | 0 |  |  |  |   |   | 0 |
| Otto (1992)             | Physiologic changes with maximal exercise in asymptomatic valvular aortic stenosis assessed by Doppler echocardiography.                            | 1 | 1 | 1 | 1 |   | 1 | 1 | 1 |   | 1 | 0 | 0 | 1 |  |  | 1 |  |  | 0 | 1 | 0 | 0 |  |  |  |   |   | 0 |
| Mahfouz (2015)          | Left ventricular restrictive filling pattern and the presence of contractile reserve in patients with low-flow/low-gradient severe aortic stenosis. | 1 | 1 | 1 | 1 | 2 | 1 | 1 | 0 |   | 1 | 0 | 0 | 1 |  |  | 1 |  |  | 1 | 0 | 0 | 0 |  |  |  | 1 |   | 0 |



| Aortic Coarctation |                                                                                                                            |   |   |   |   |   |   |   |   |   |  |   |   |   |   |  |  |   |  |  |   |   |   |   |  |  |   |  |   |
|--------------------|----------------------------------------------------------------------------------------------------------------------------|---|---|---|---|---|---|---|---|---|--|---|---|---|---|--|--|---|--|--|---|---|---|---|--|--|---|--|---|
| Pedersen (2010)    | Blood flow measured by magnetic resonance imaging at rest and exercise after surgical bypass of aortic arch obstruction.   | 1 | 1 | 1 | 1 | 1 | 1 | 1 | 1 | 0 |  | 0 | 0 | 0 | 1 |  |  | 1 |  |  | 1 | 1 | 0 | 0 |  |  | 1 |  | 0 |
| Kimball (1986)     | Persistent ventricular adaptations in postoperative coarctation of the aorta.                                              | 1 | 1 | 1 | 1 | 1 | 1 | 1 | 1 | 0 |  | 0 | 0 | 0 | 1 |  |  | 1 |  |  | 1 | 0 | 1 | 0 |  |  | 1 |  | 0 |
| Carpenter (1985)   | Left ventricular hyperkinesia at rest and during exercise in normotensive patients 2 to 27 years after coarctation repair. | 1 | 1 | 1 | 1 | 2 | 1 | 1 | 1 | 0 |  | 0 | 1 | 0 | 1 |  |  | 1 |  |  | 1 | 0 | 0 | 0 |  |  | 0 |  | 0 |
| Weber (1993)       | Discrepancies in aortic growth explain aortic arch gradients during exercise.                                              | 1 | 1 | 1 | 1 |   | 1 | 1 | 1 |   |  | 0 | 0 | 0 | 1 |  |  | 1 |  |  | 1 | 0 | 0 | 0 |  |  |   |  | 0 |

**Reporting:** 1. Hypothesis/aims/objectives clearly stated 2. Main outcome measures clearly described 3. Characteristics of patients/subjects clearly described 4. Interventions of interest clearly described 5. Distribution of principal confounders in each group clearly described 6. Main findings clearly described 7. Estimates of random variability in the data provided 8. Important adverse events reported 9. Characteristics of patients lost to follow-up described 10. Actual probability values reported

**External validity:** 11. Participants approached representative of entire population 12. Participants recruited representative of entire population 13. Staff, places and facilities representative of majority of population

**Internal validity-bias:** 14. Blinding of study subjects 15. Blinding of assessors 16. Data based on data-dredging clearly stated 17. Adjustment of different length of follow-up or duration between case and control 18. Appropriate statistical tests used 19. Compliance to intervention reliable 20. Main outcome measure reliable and valid

**Internal validity-confounding:** 21. Intervention groups or case-controls recruited from same population 22. Intervention groups or case-controls recruited at the same time 23. Study subjects randomized to the interventions 24. Was concealed randomization to allocation undertaken 25. Adequate adjustment made in the analysis of confounders 26. Patient losses accounted for

**Power (P.):** 27. Sufficiently powered cohort size

Supplementary Figures

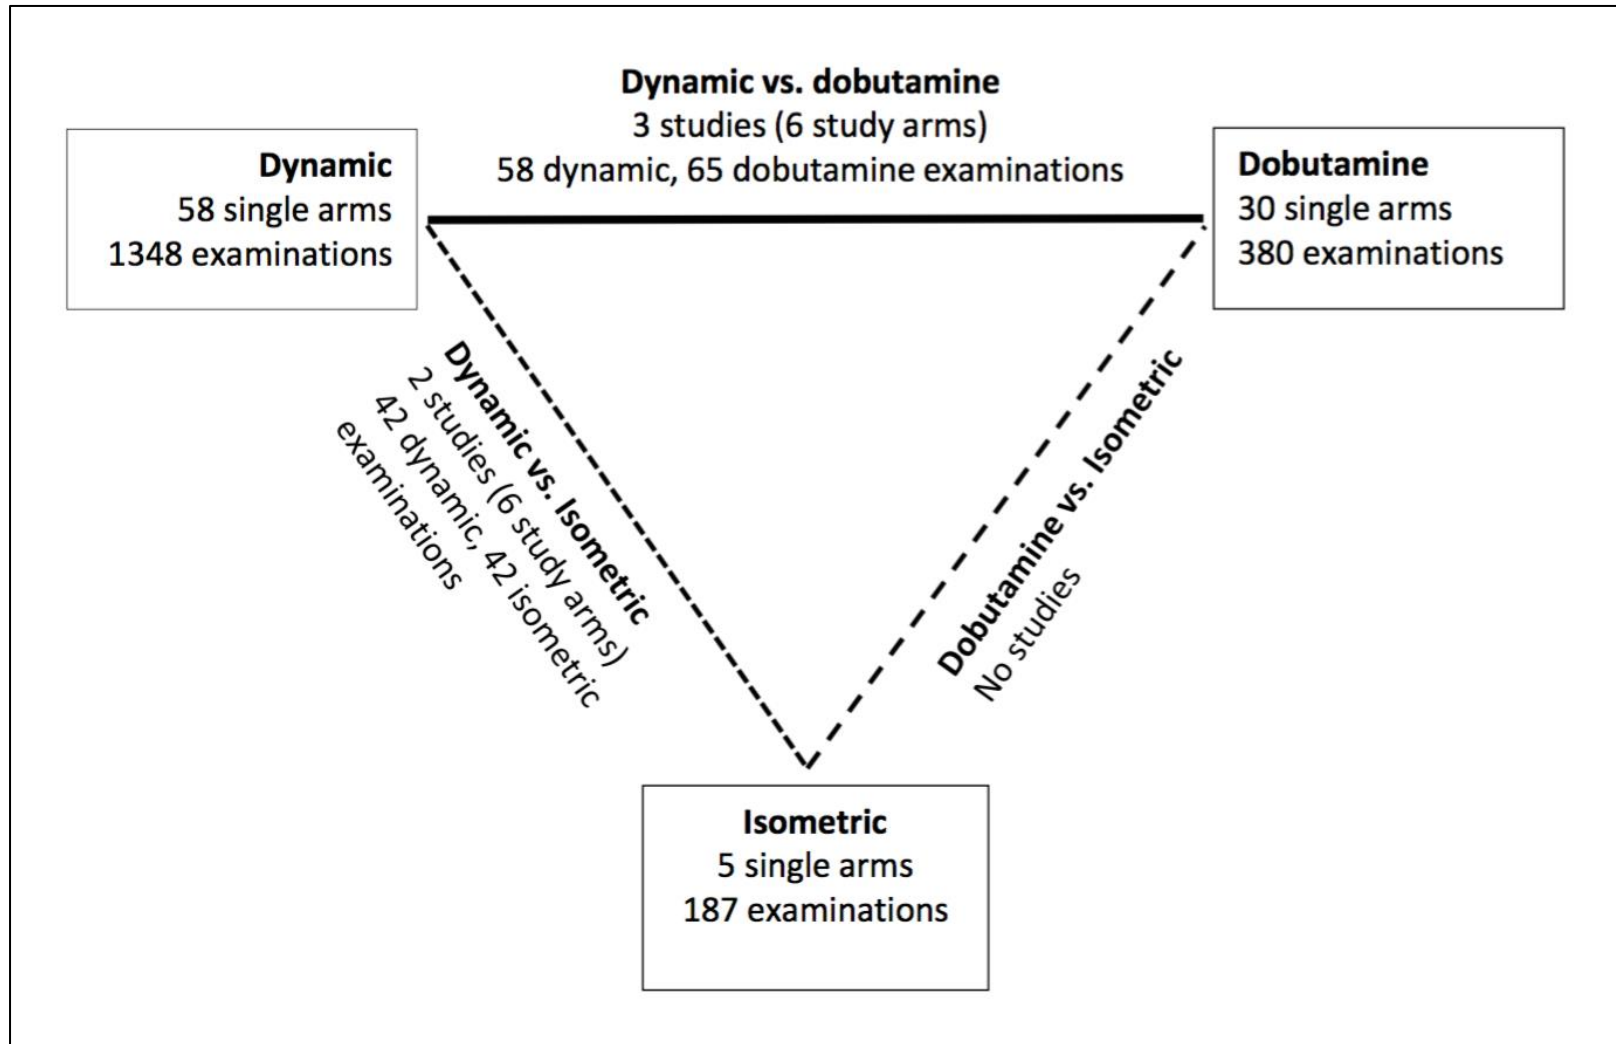

**Figure S1.** Network of evidence for findings in healthy subjects (adapted from Salcher et al., Circ Cardiovasc Interv. 2016; 9). Different types of stress testing (dynamic, isometric, pharmacological stress) are shown at the edges. Lines connecting the edges represent the limited number of studies directly comparing the different stress types to each other.

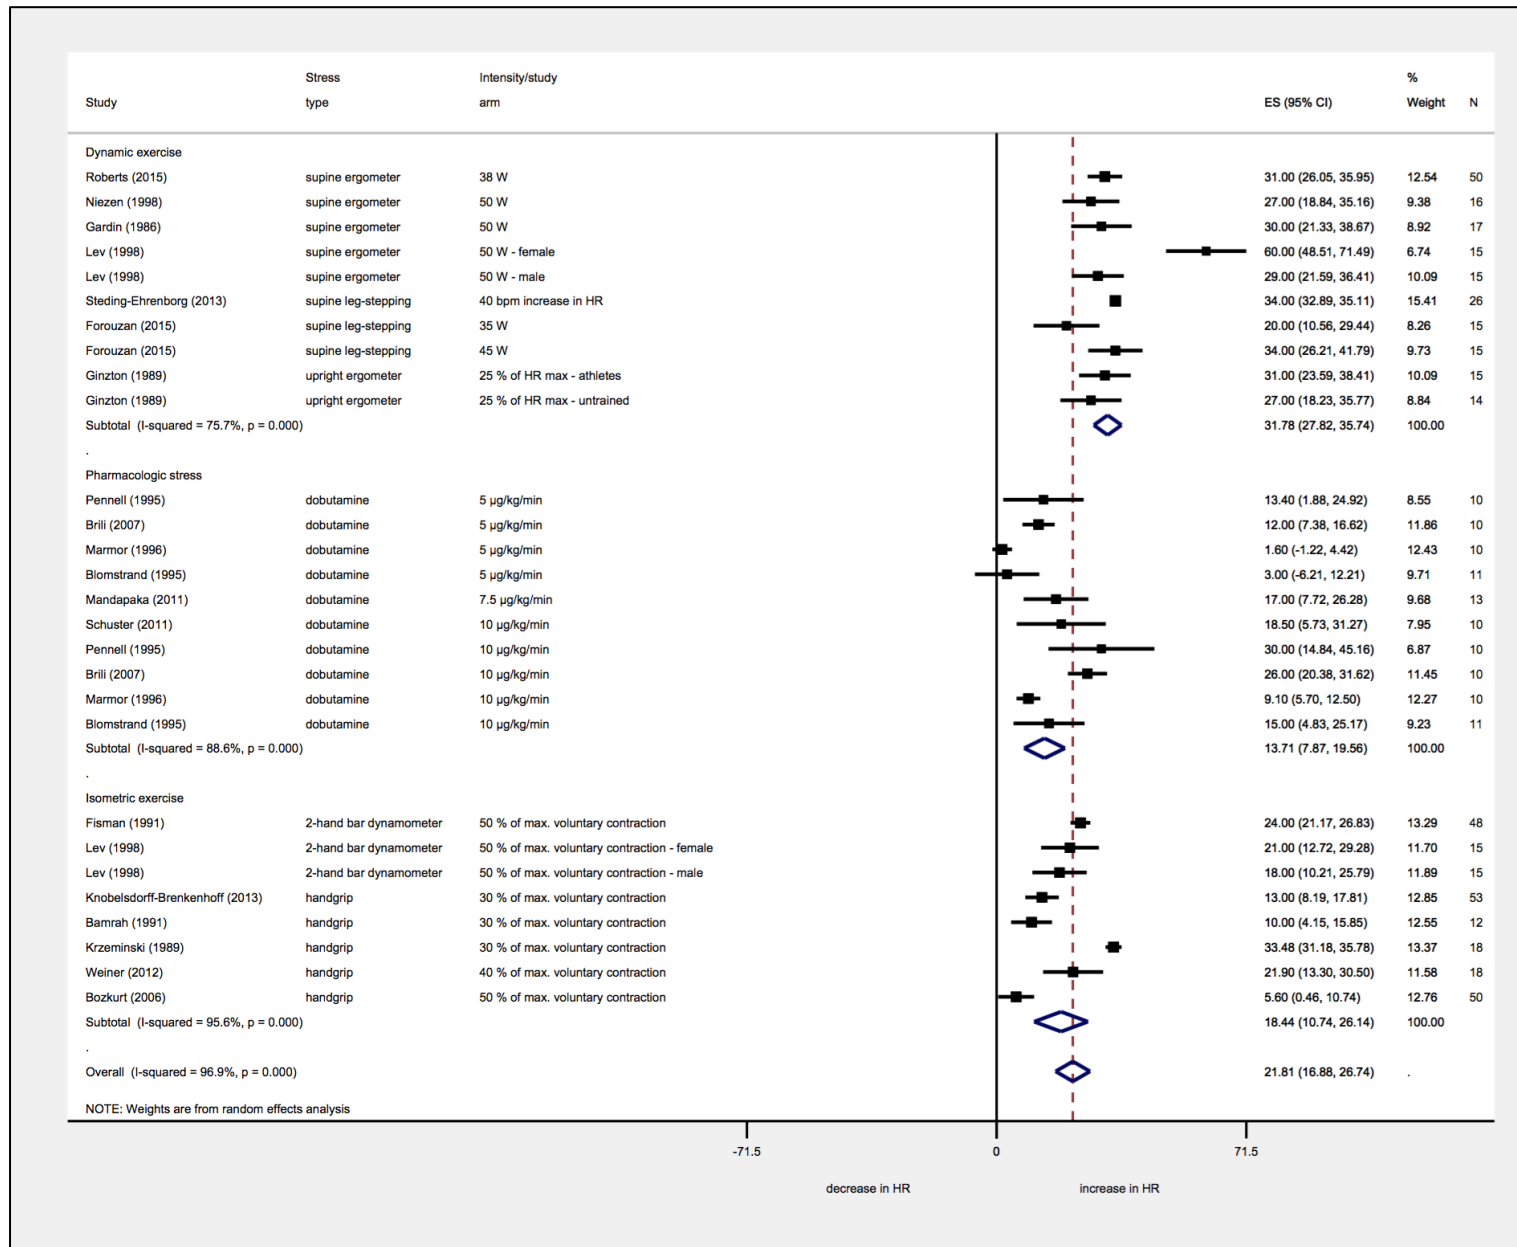

Figure S2. HR Changes [bpm] in healthy subjects for light intensity stress.



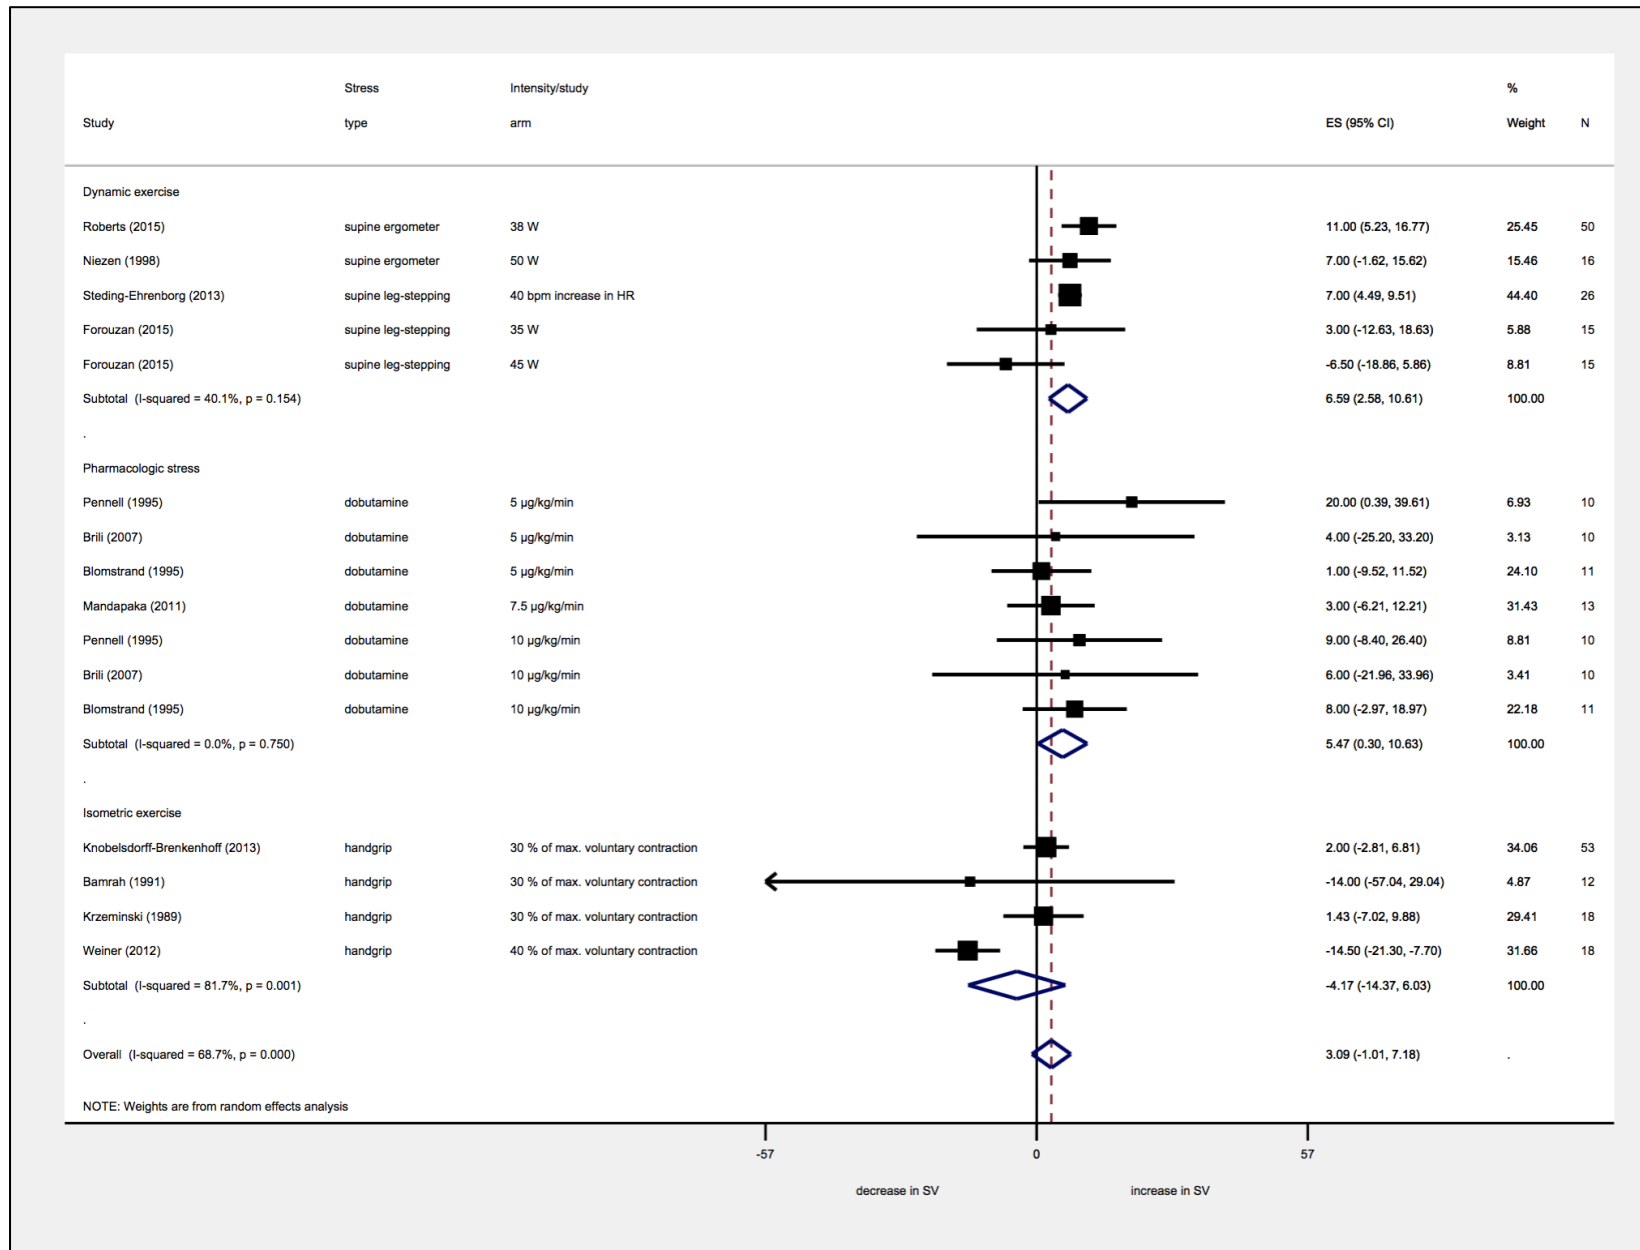

Figure S3. SV Changes [ml] in healthy subjects for light intensity stress.

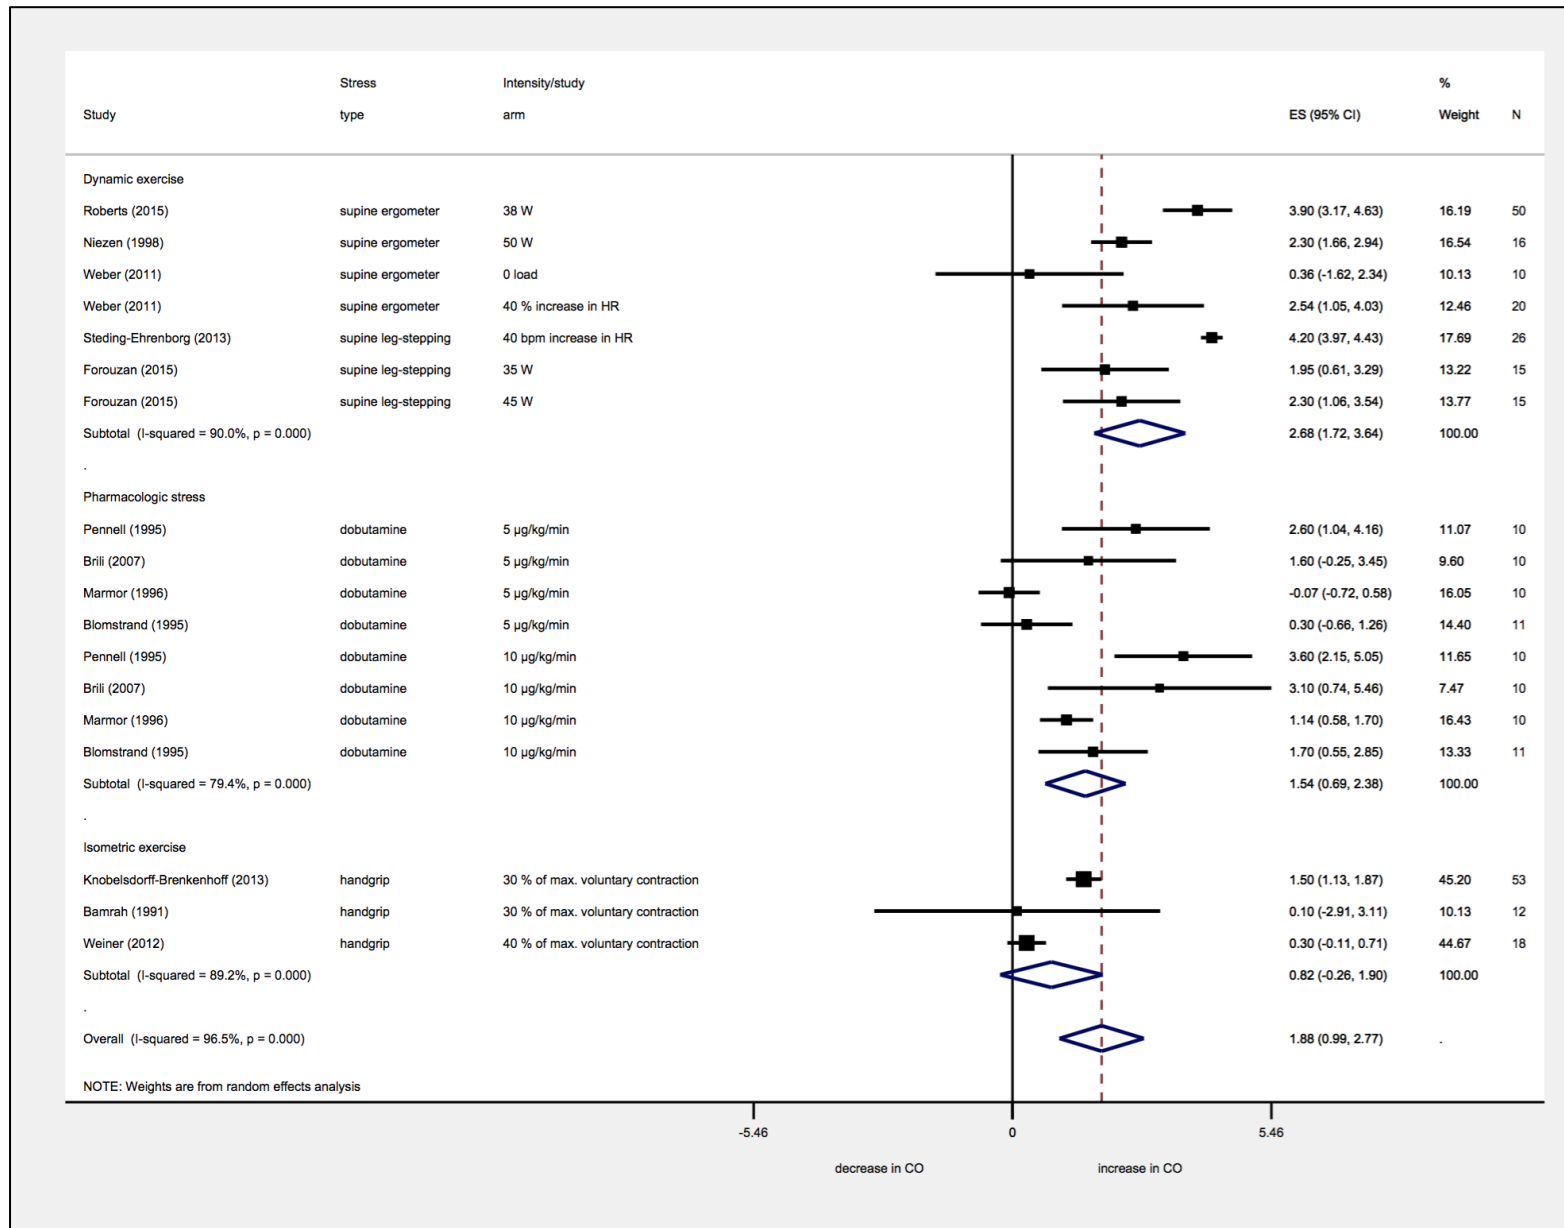

Figure S4. CO Changes [l/min] in healthy subjects for light intensity stress.

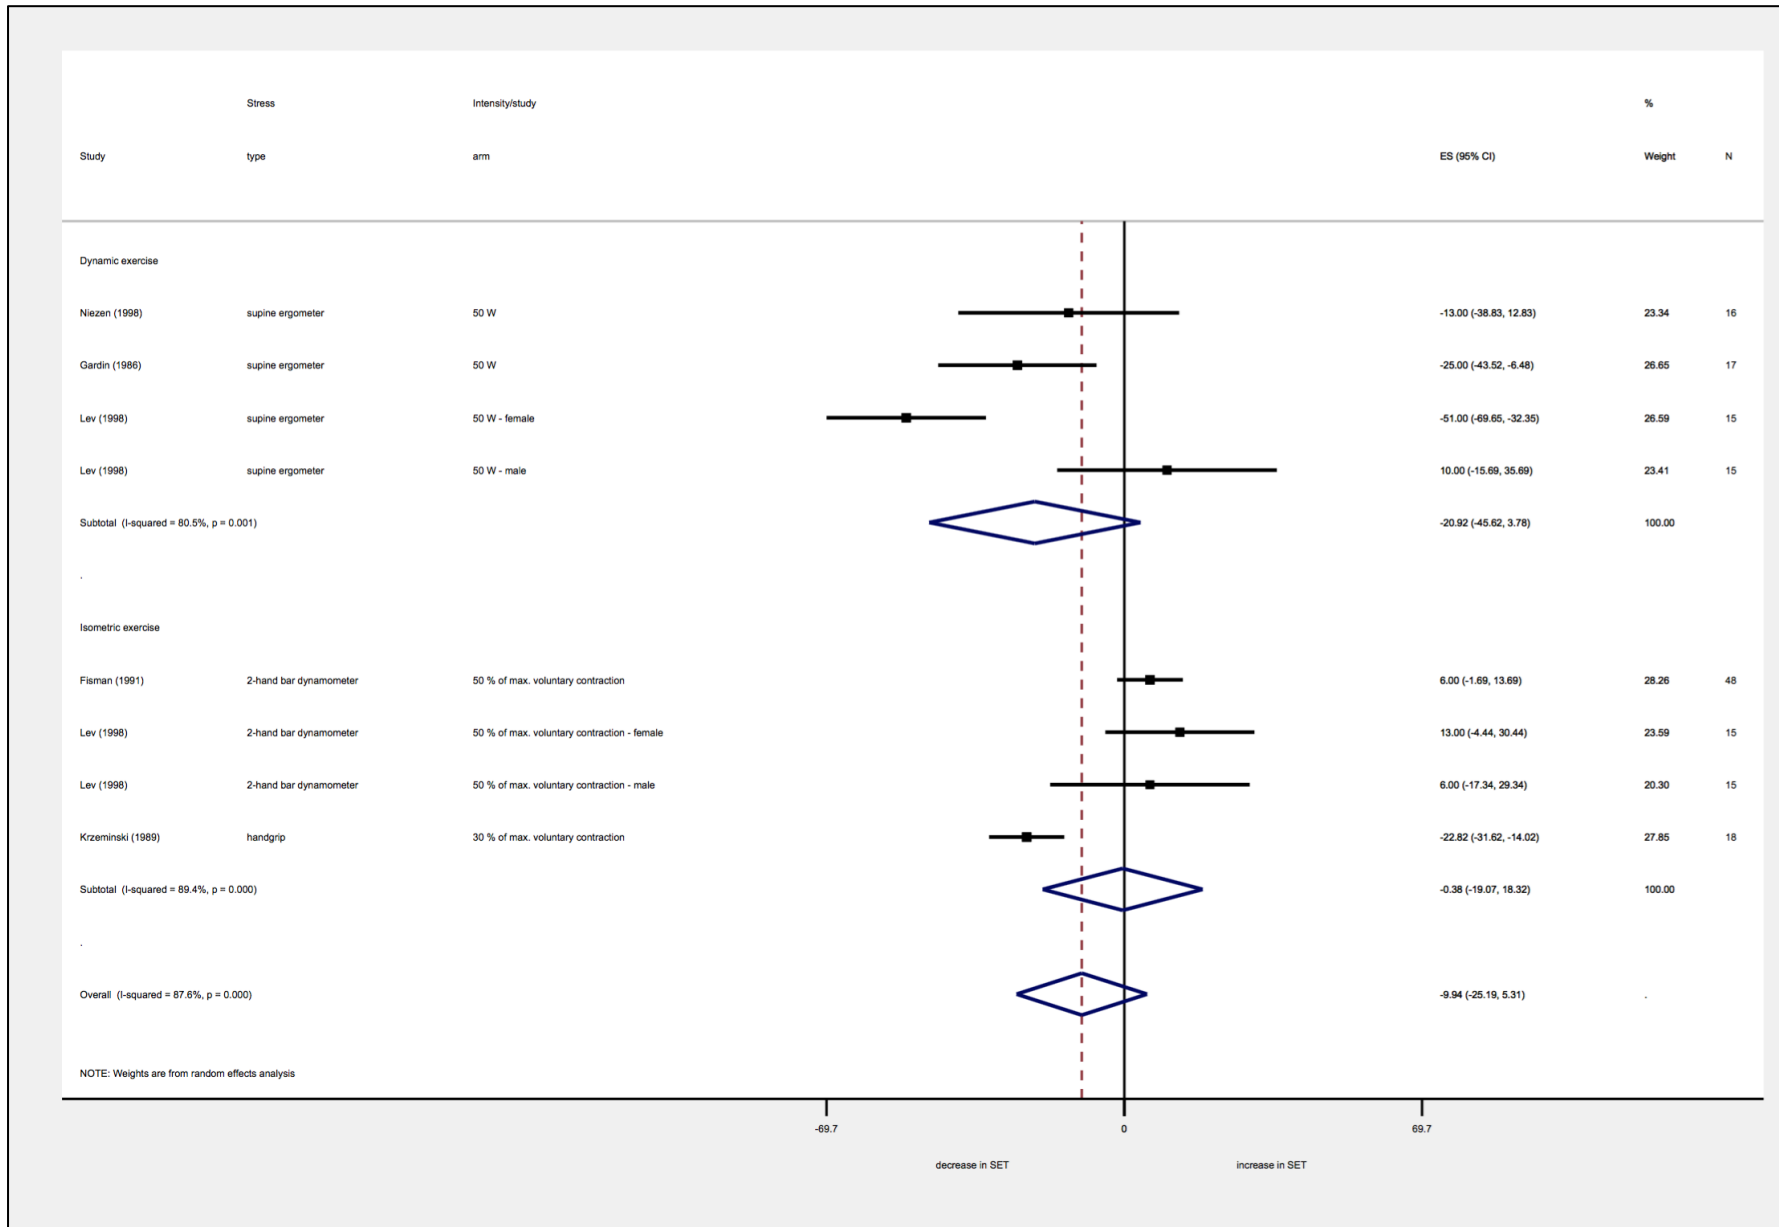

Figure S5. SET Changes [ms] in healthy subjects for light intensity stress.

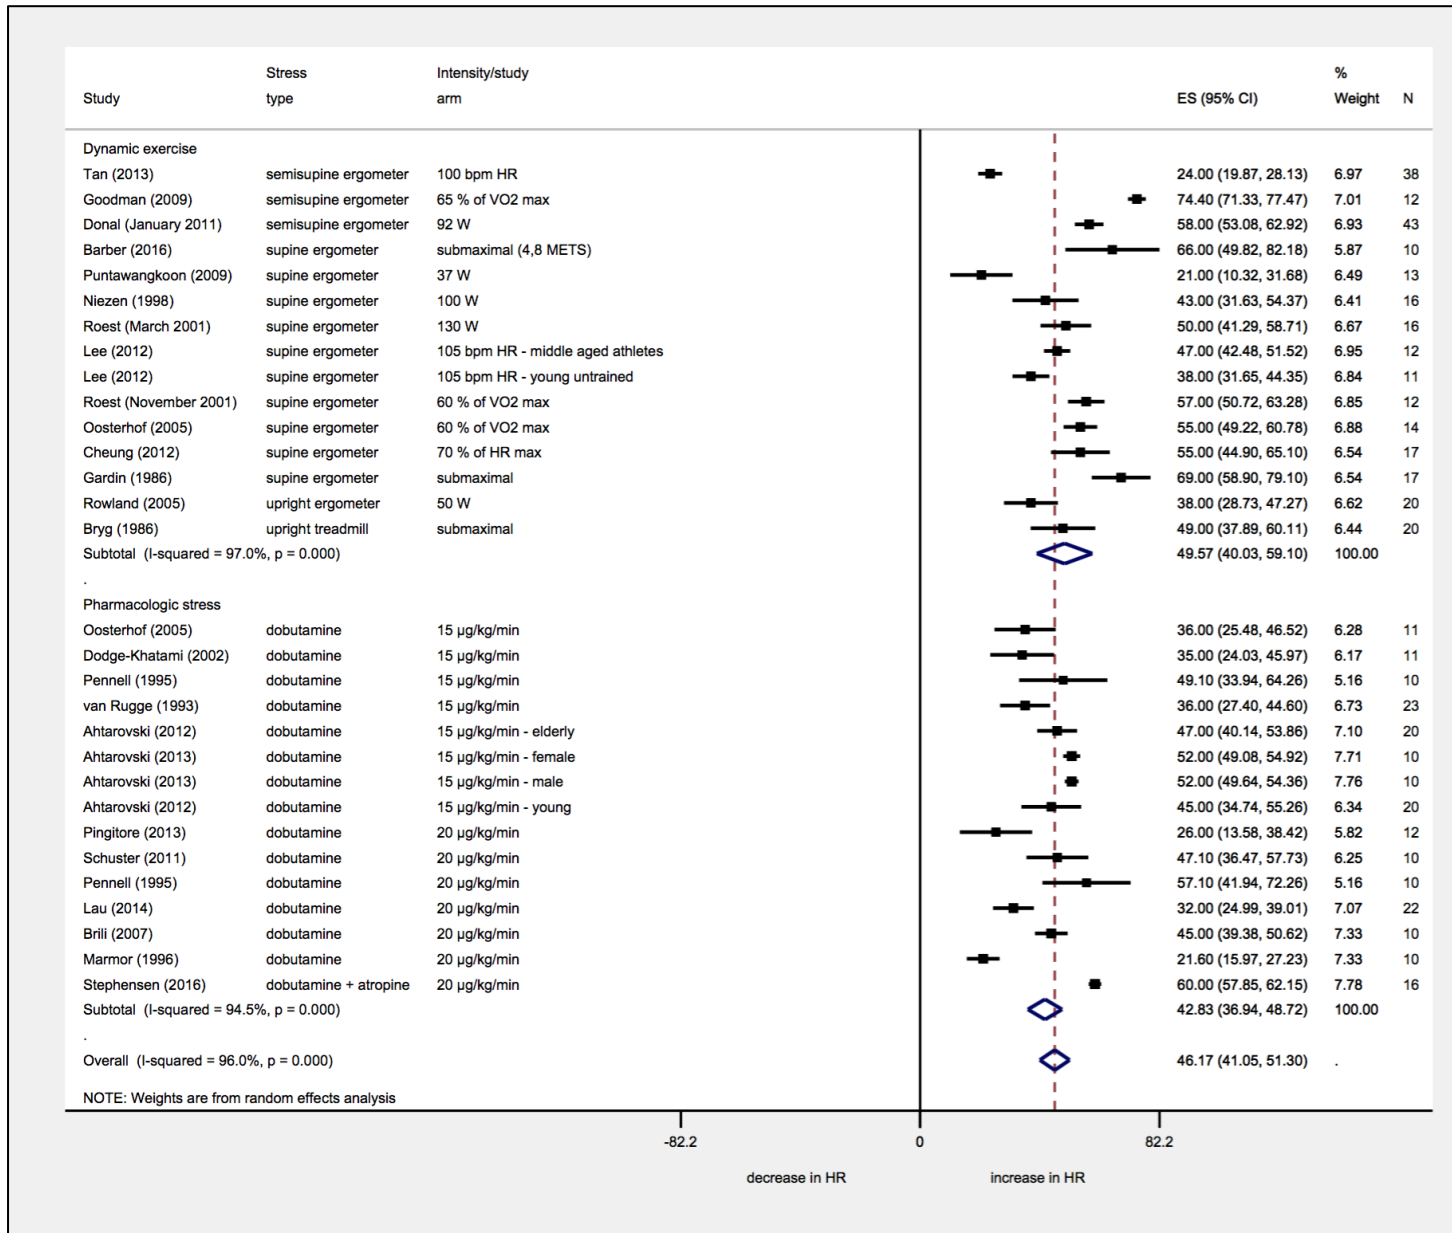

Figure S6. HR Changes [bpm] in healthy subjects for moderate intensity stress.

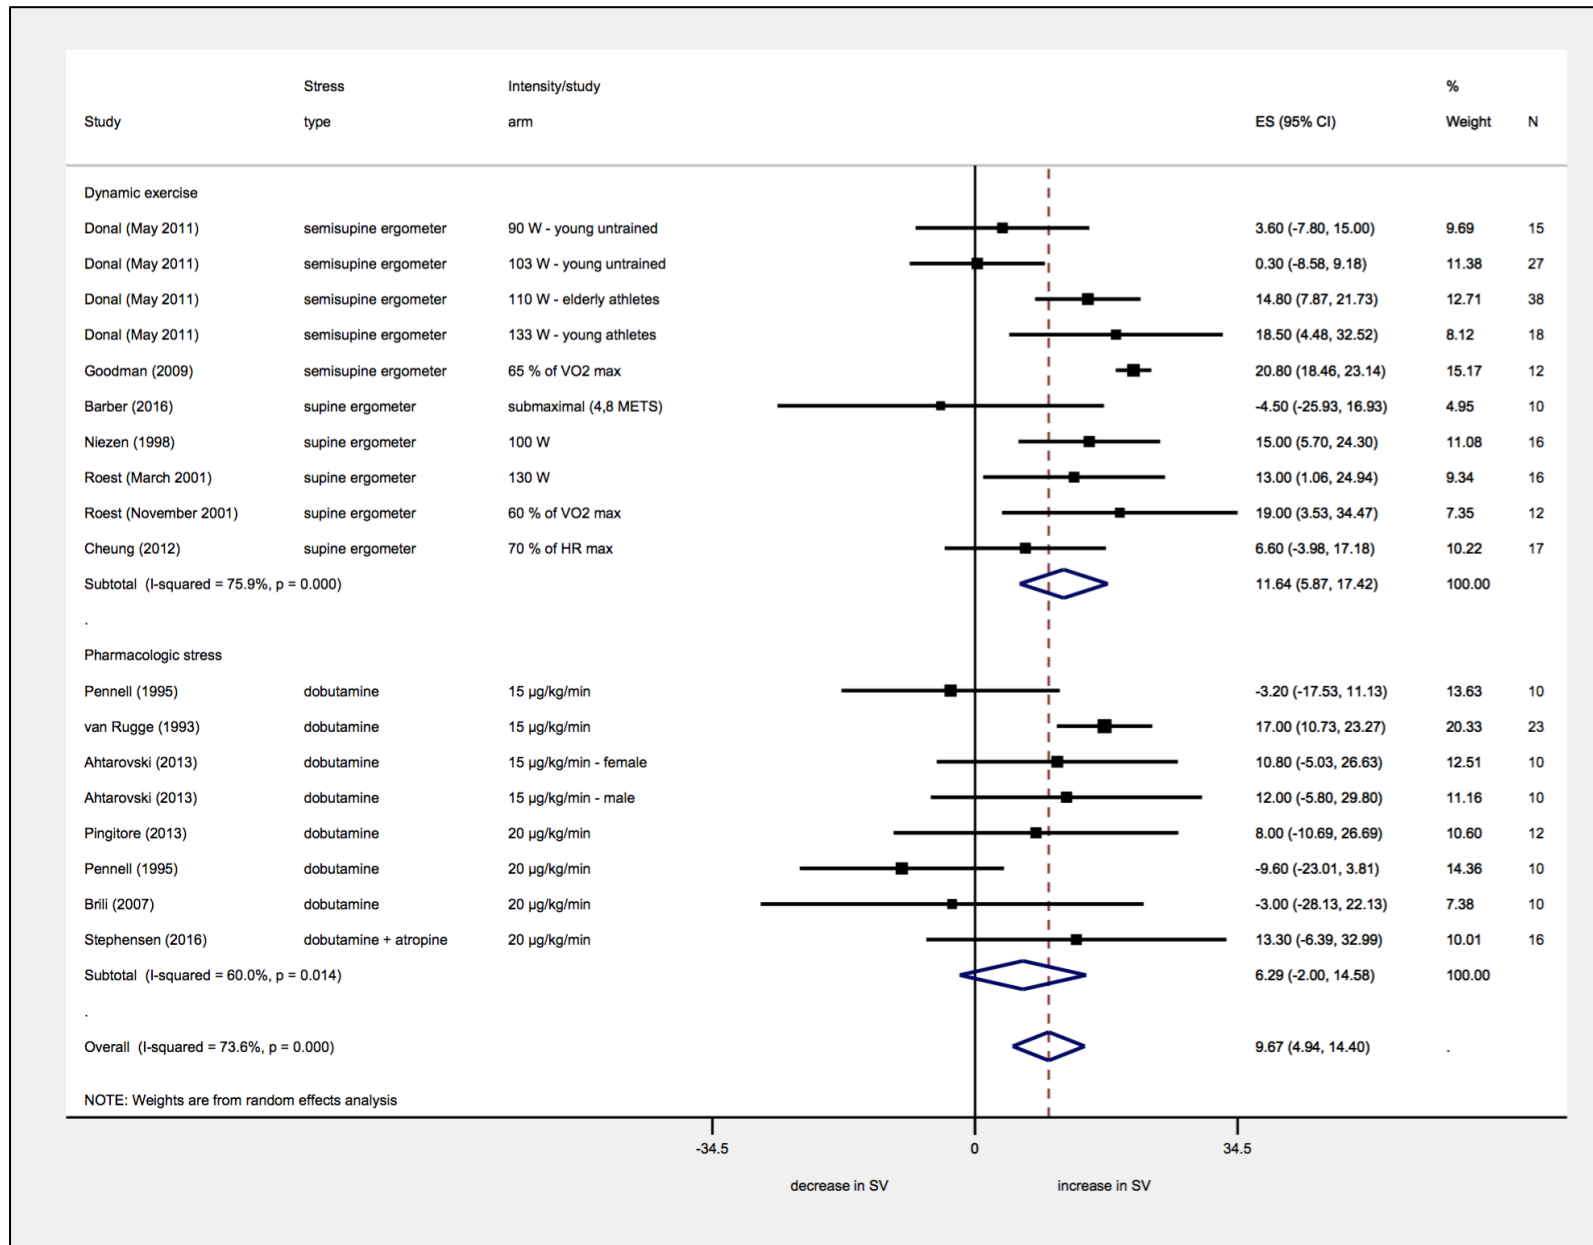

Figure S7. SV Changes [ml] in healthy subjects for moderate intensity stress.

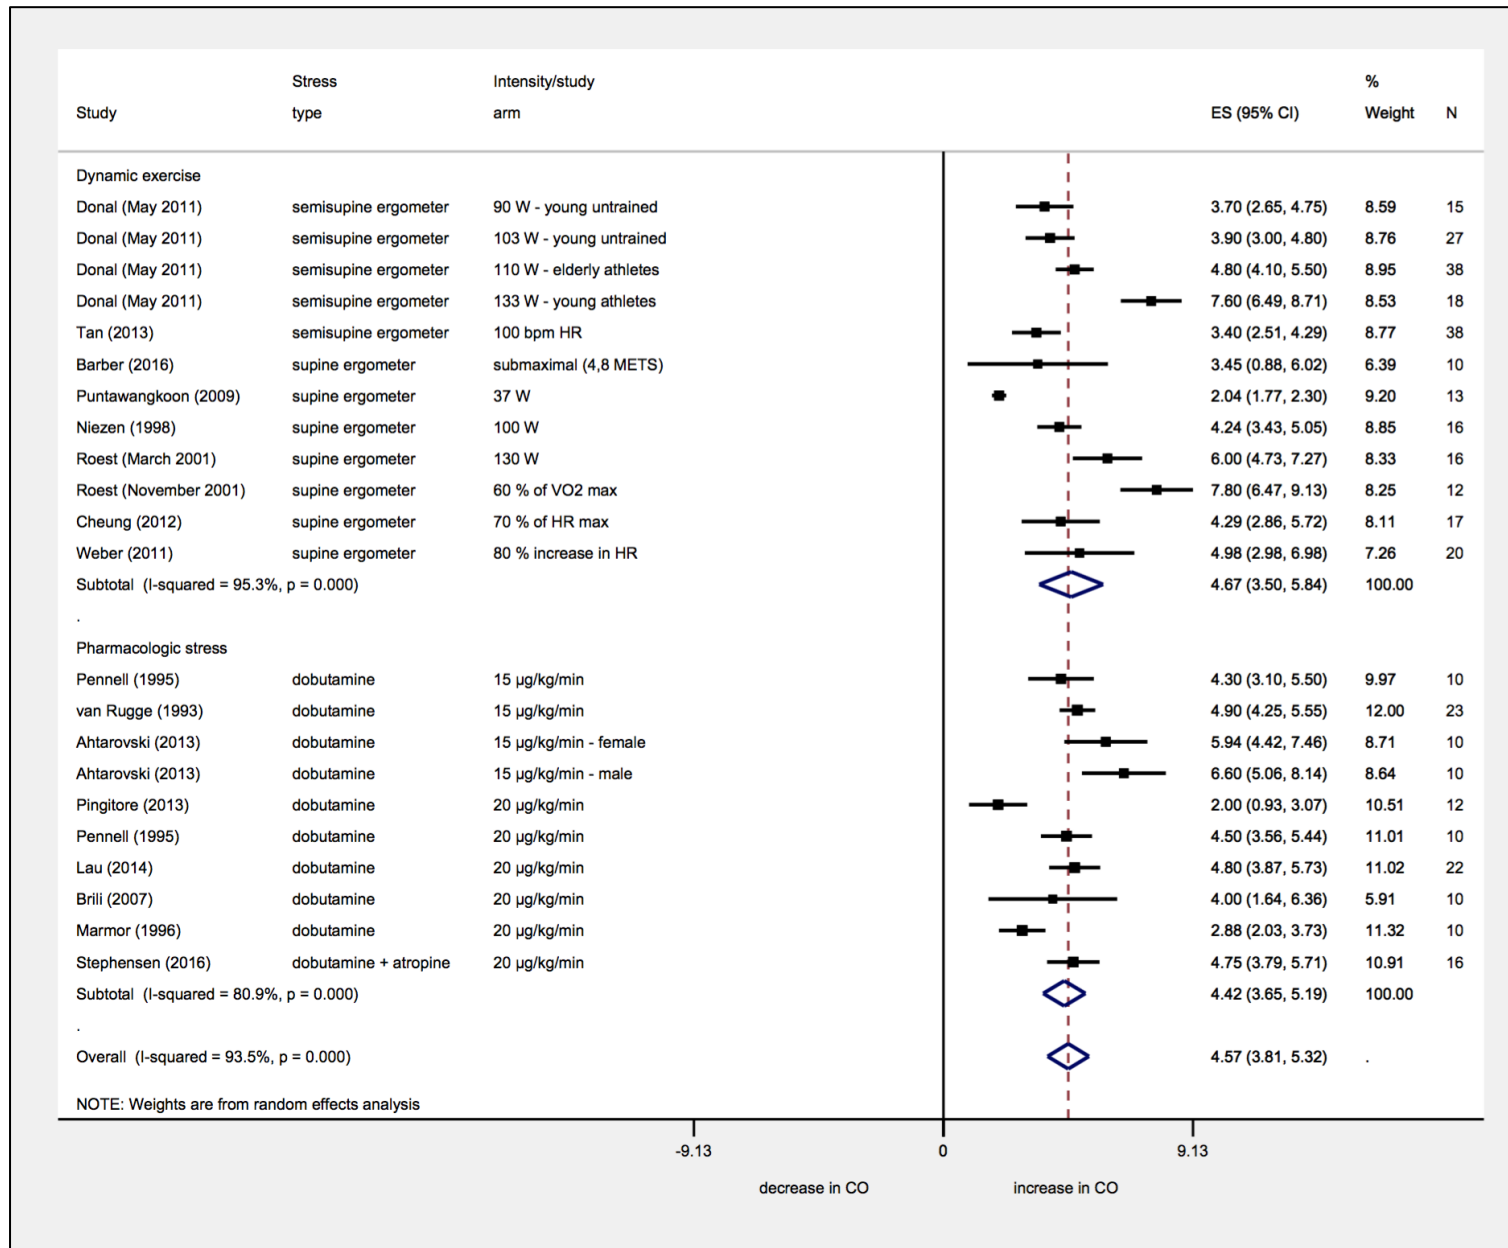

Figure S8. CO Changes [l/min] in healthy subjects for moderate intensity stress.

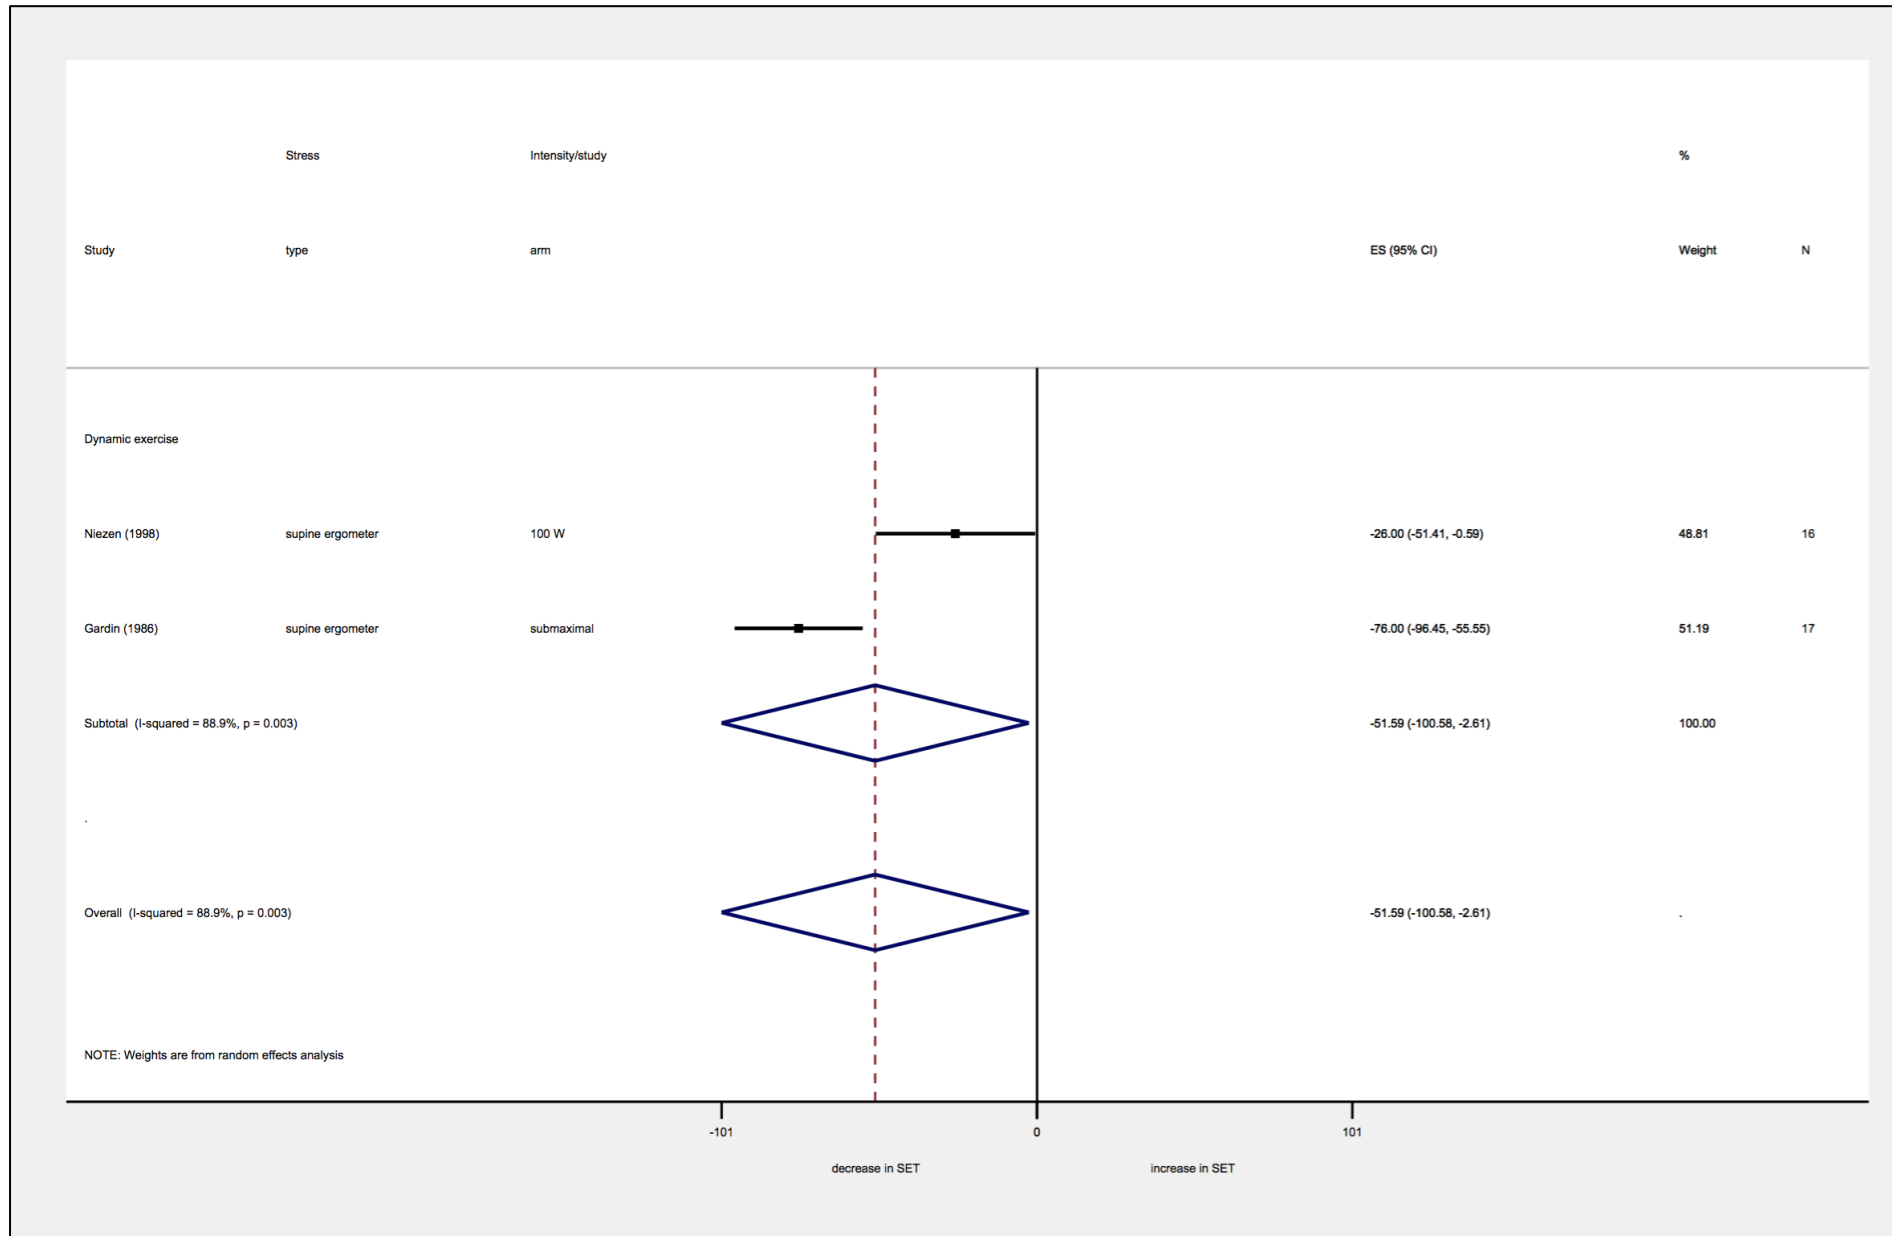

**Figure S9.** SET Changes [ms] in healthy subjects for moderate intensity stress.

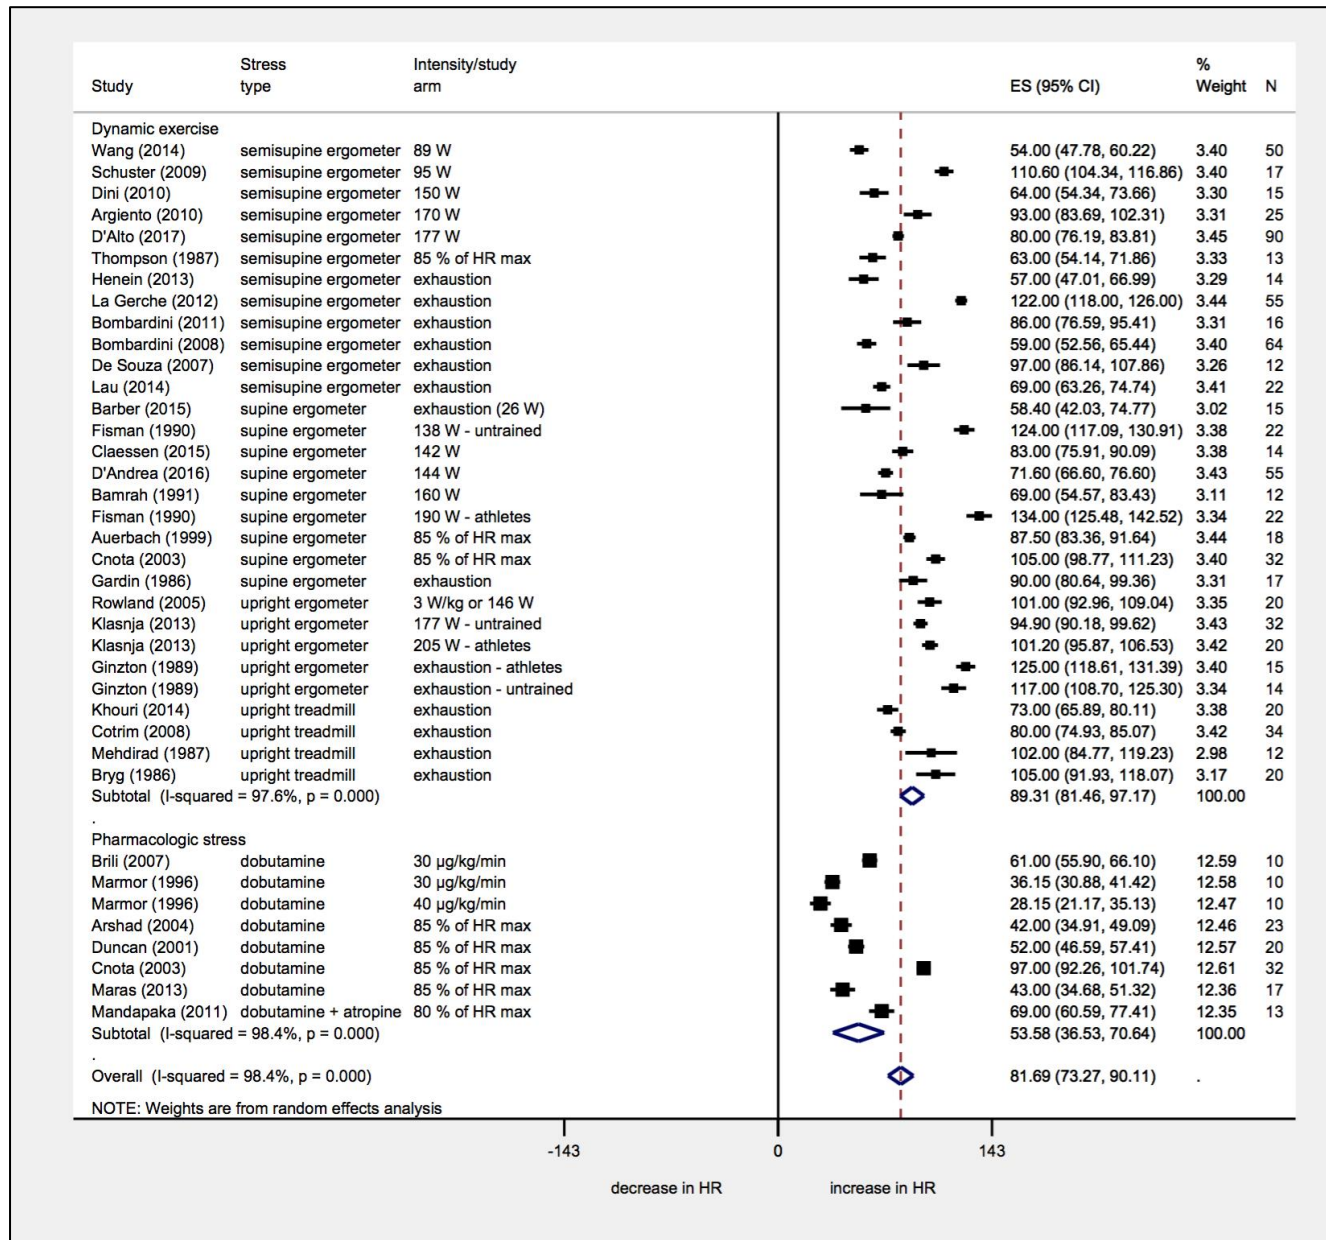

Figure S10. HR Changes [bpm] in healthy subjects for high intensity stress.



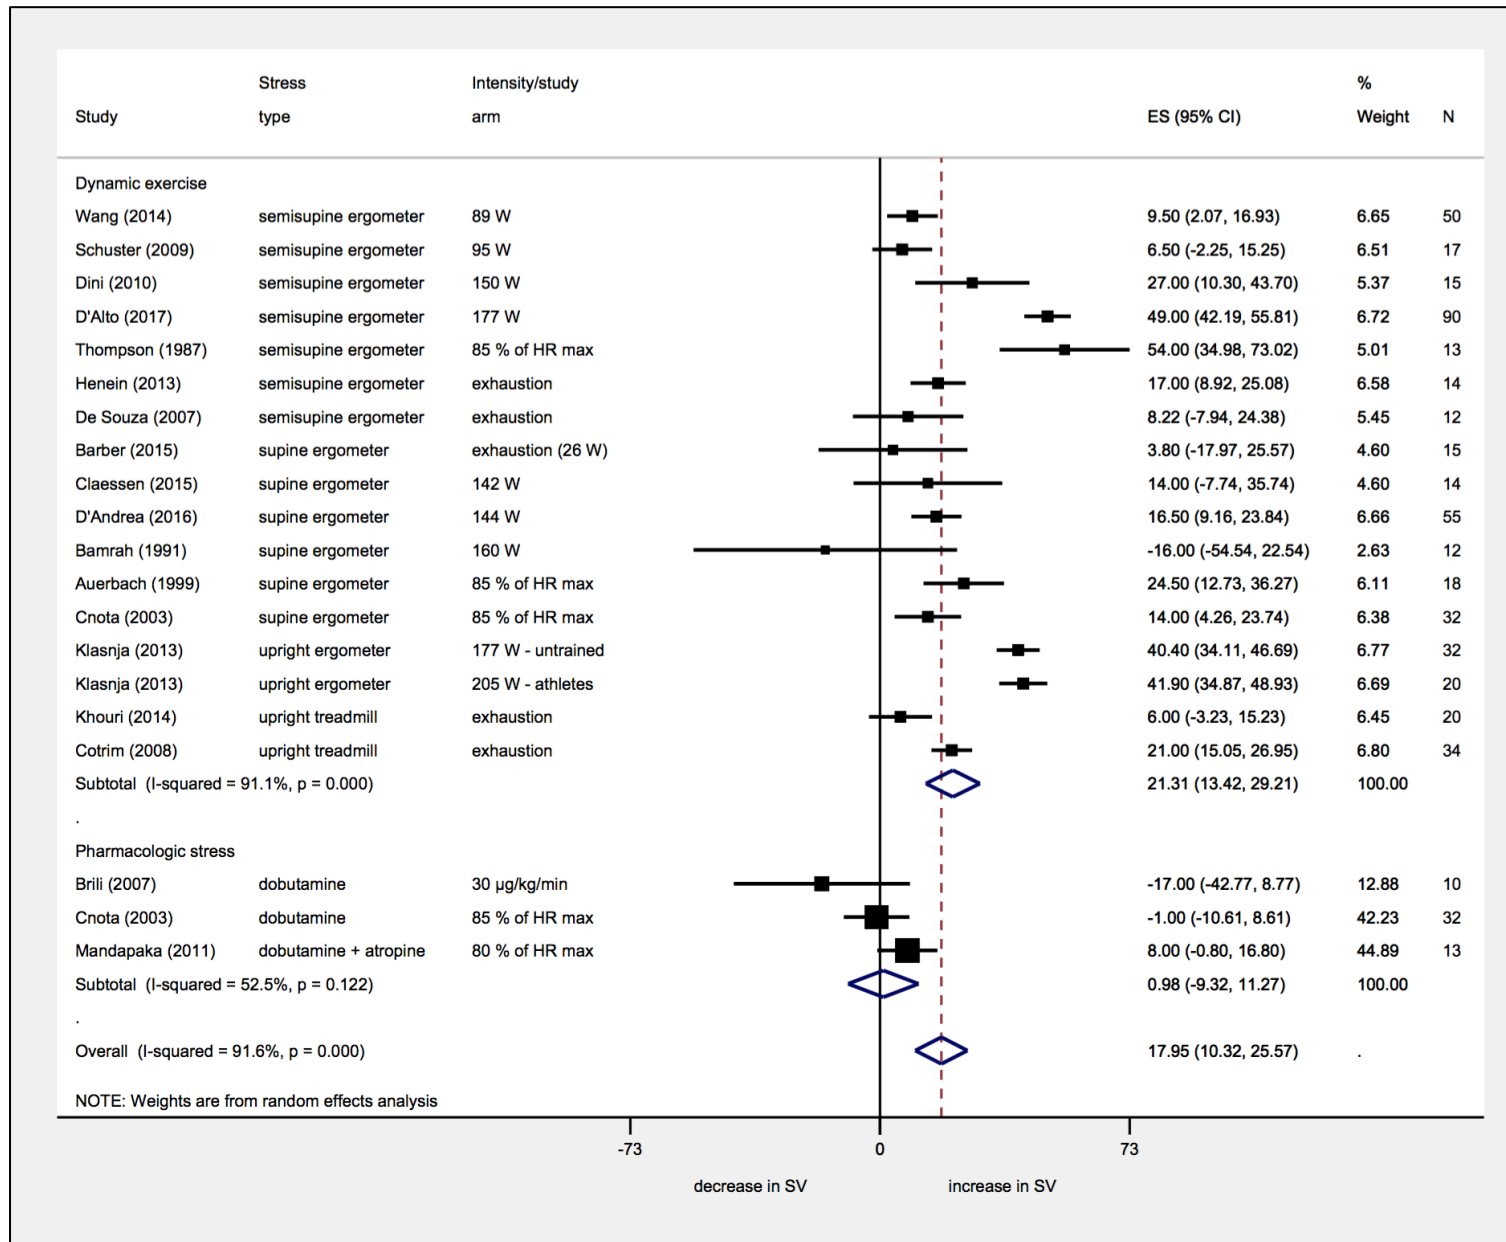

Figure S11. SV Changes [ml] in healthy subjects for high intensity stress.

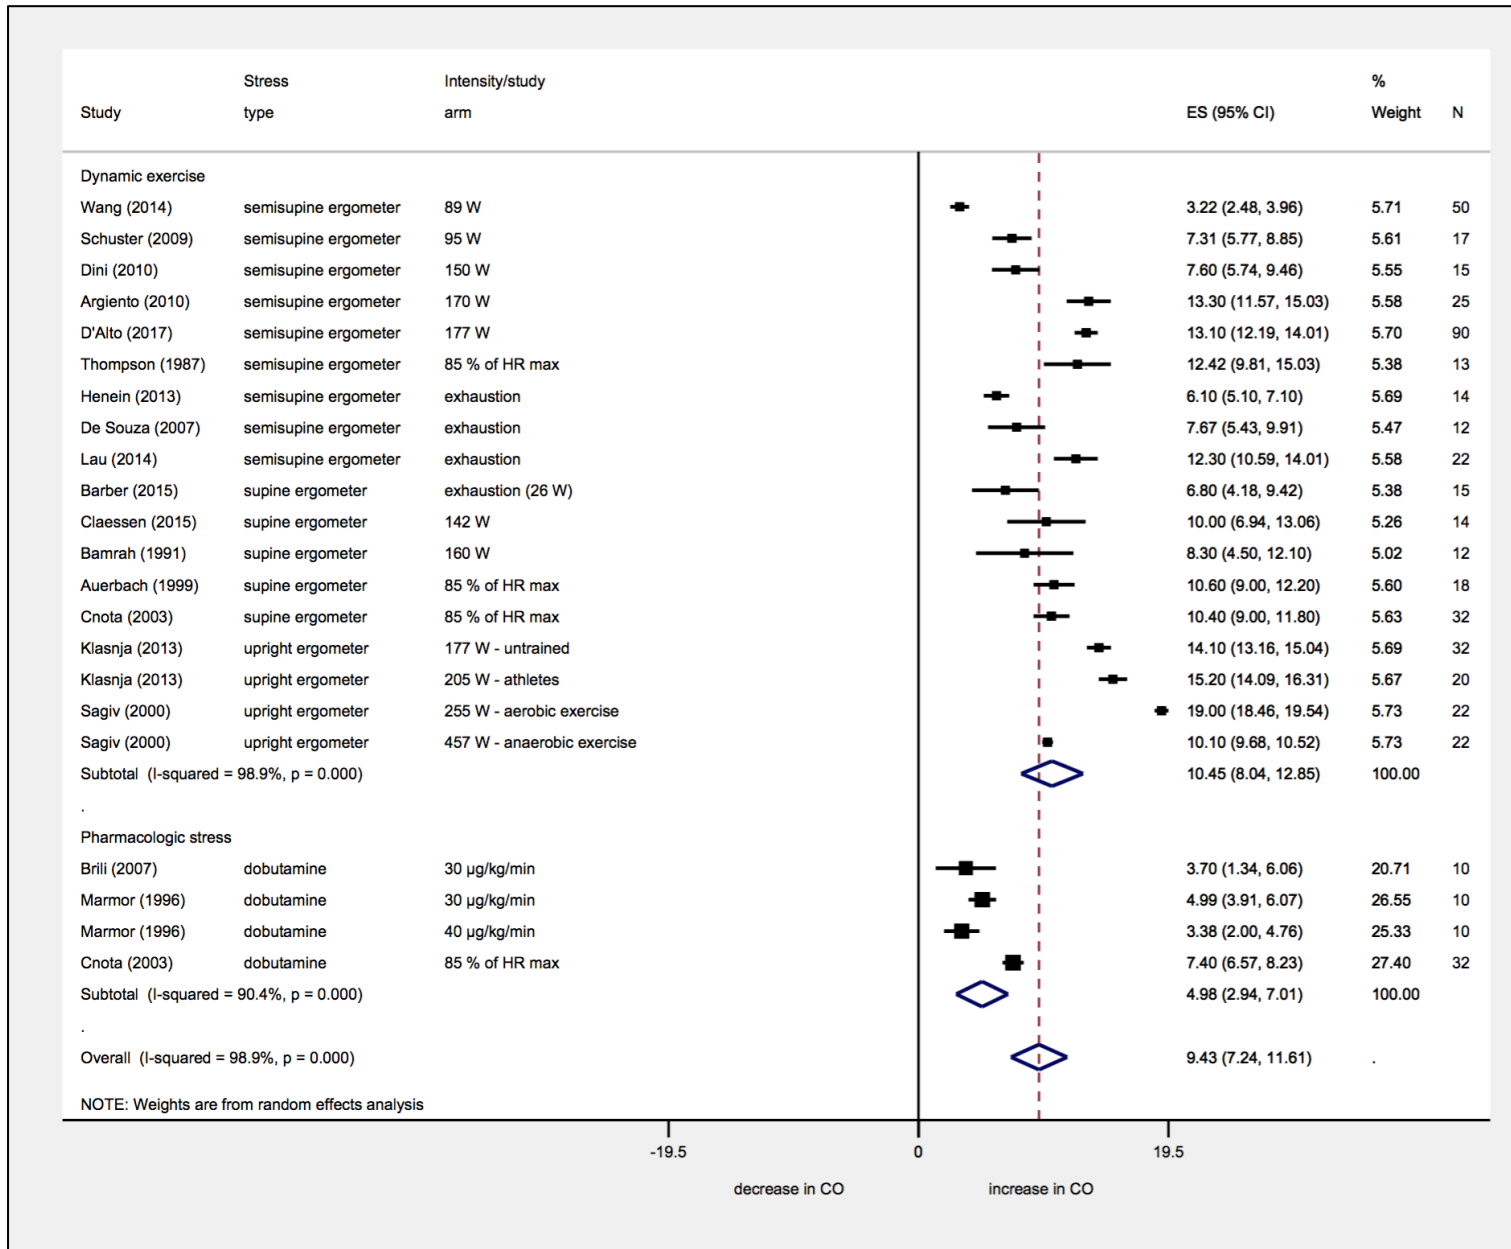

Figure S12. CO Changes [l/min] in healthy subjects for high intensity stress.

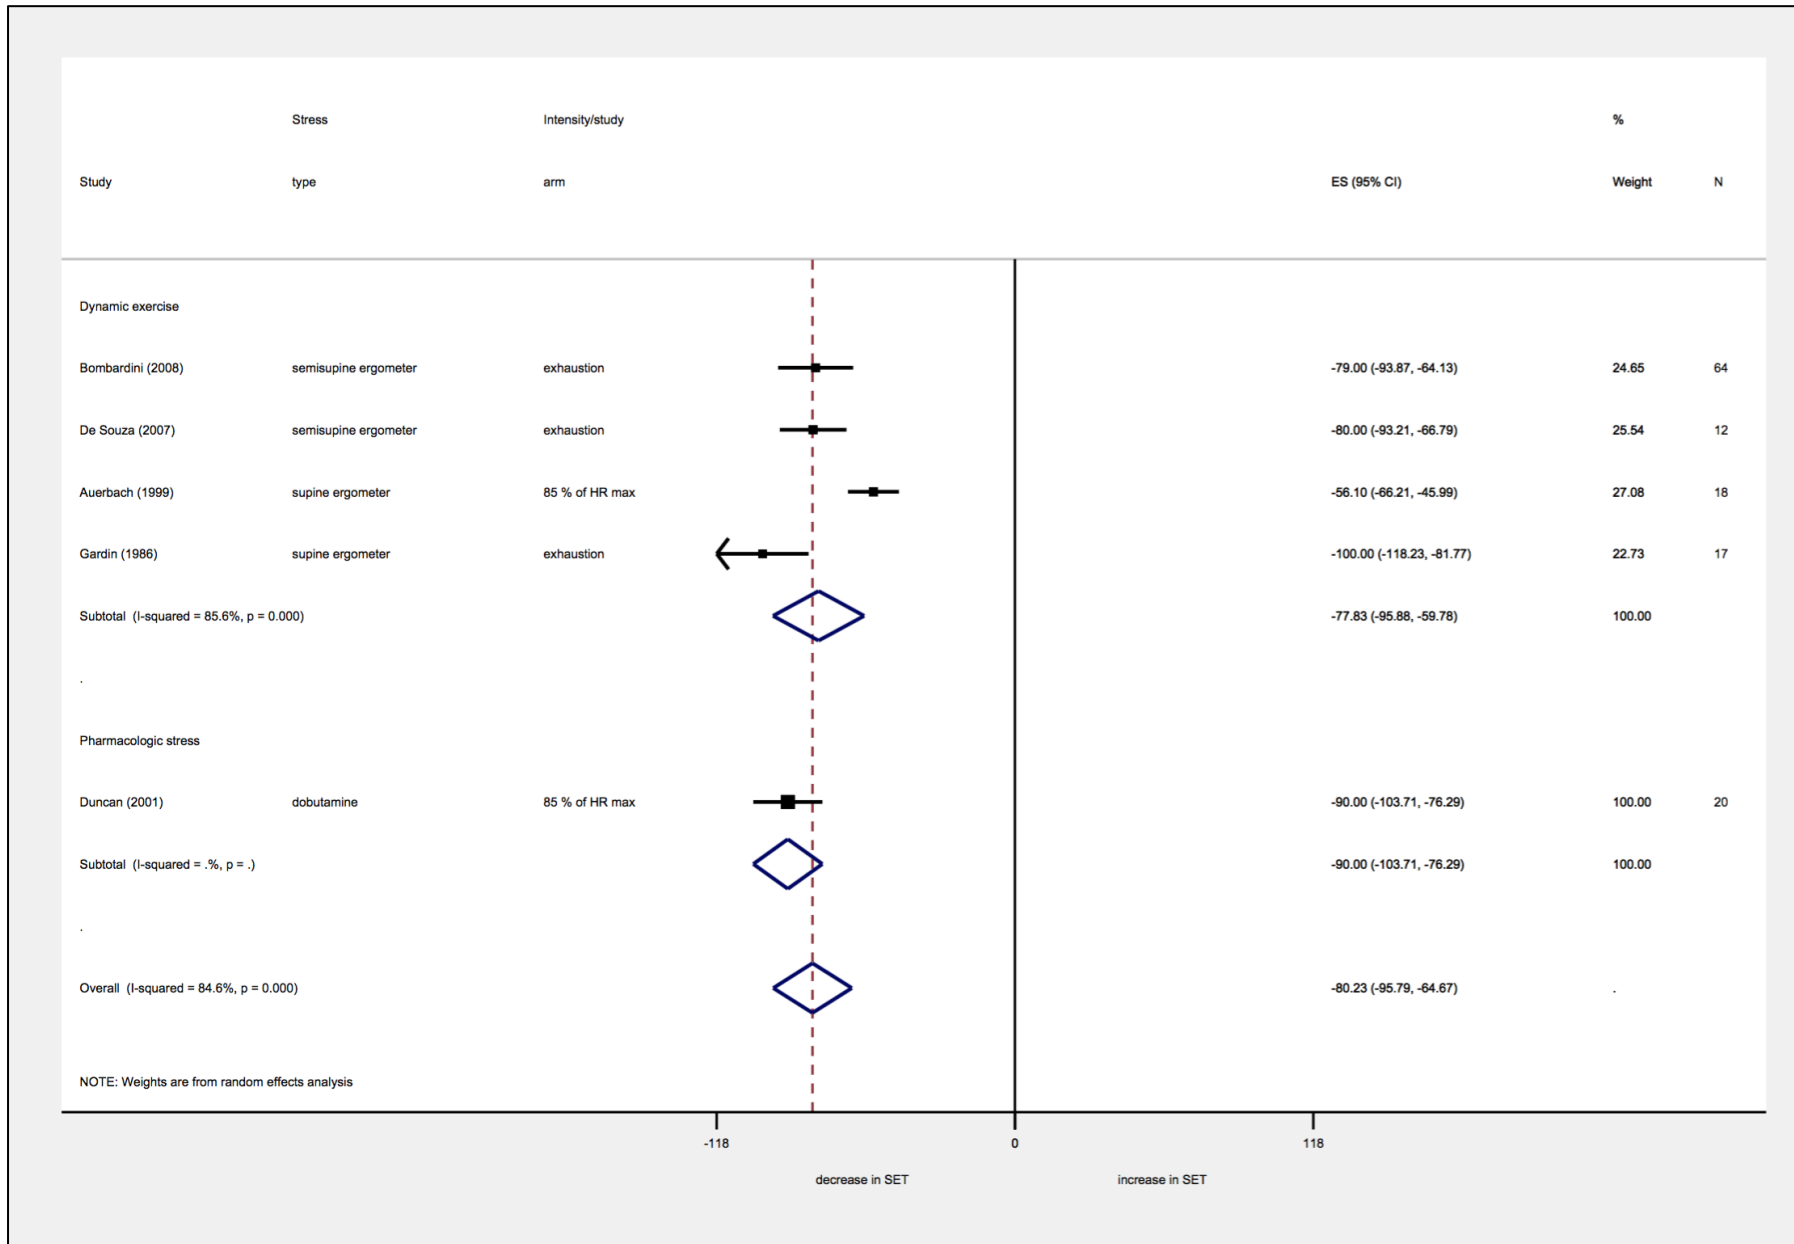

Figure S13. SET Changes [ms] in healthy subjects for high intensity stress.

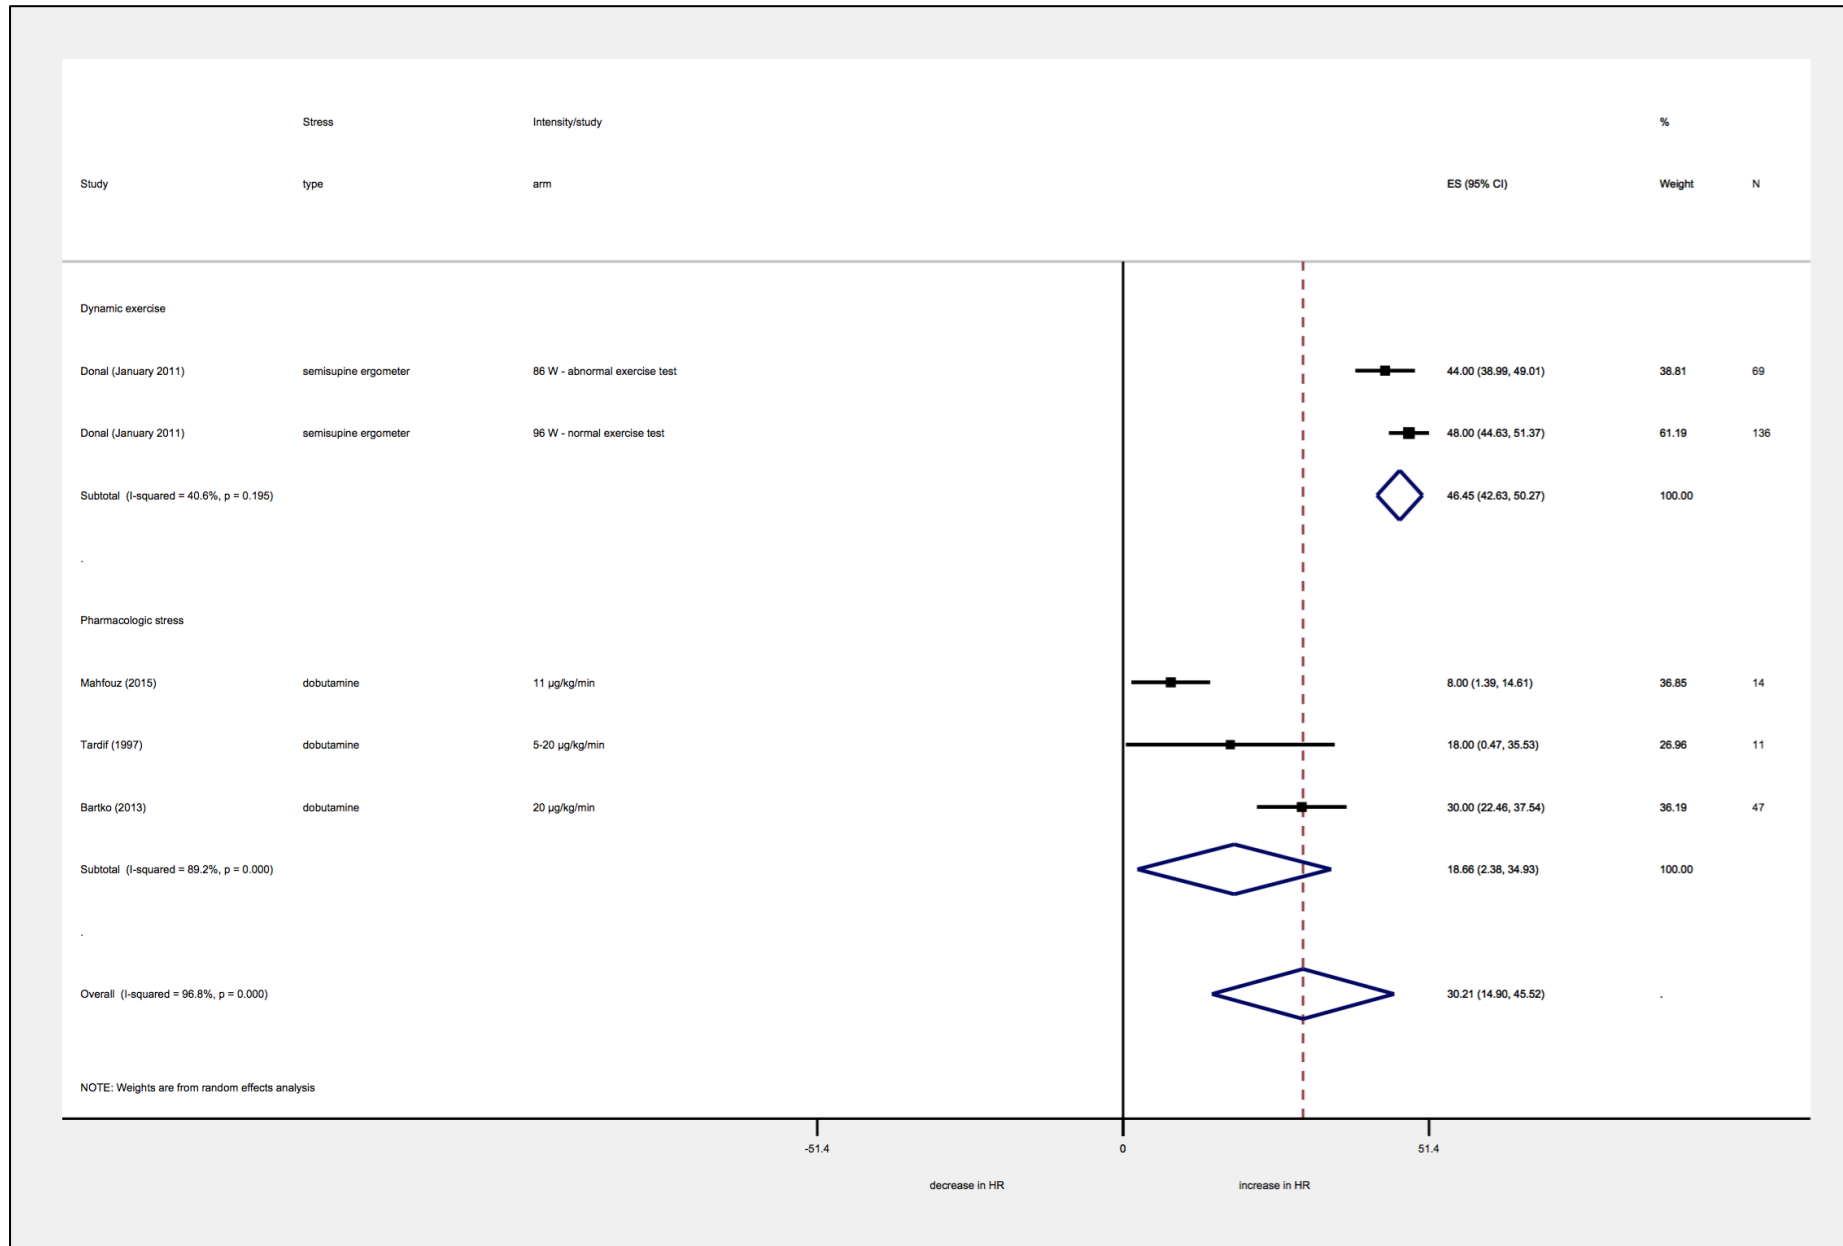

**Figure S14.** HR Changes [bpm] in patients with aortic stenosis for moderate intensity stress.

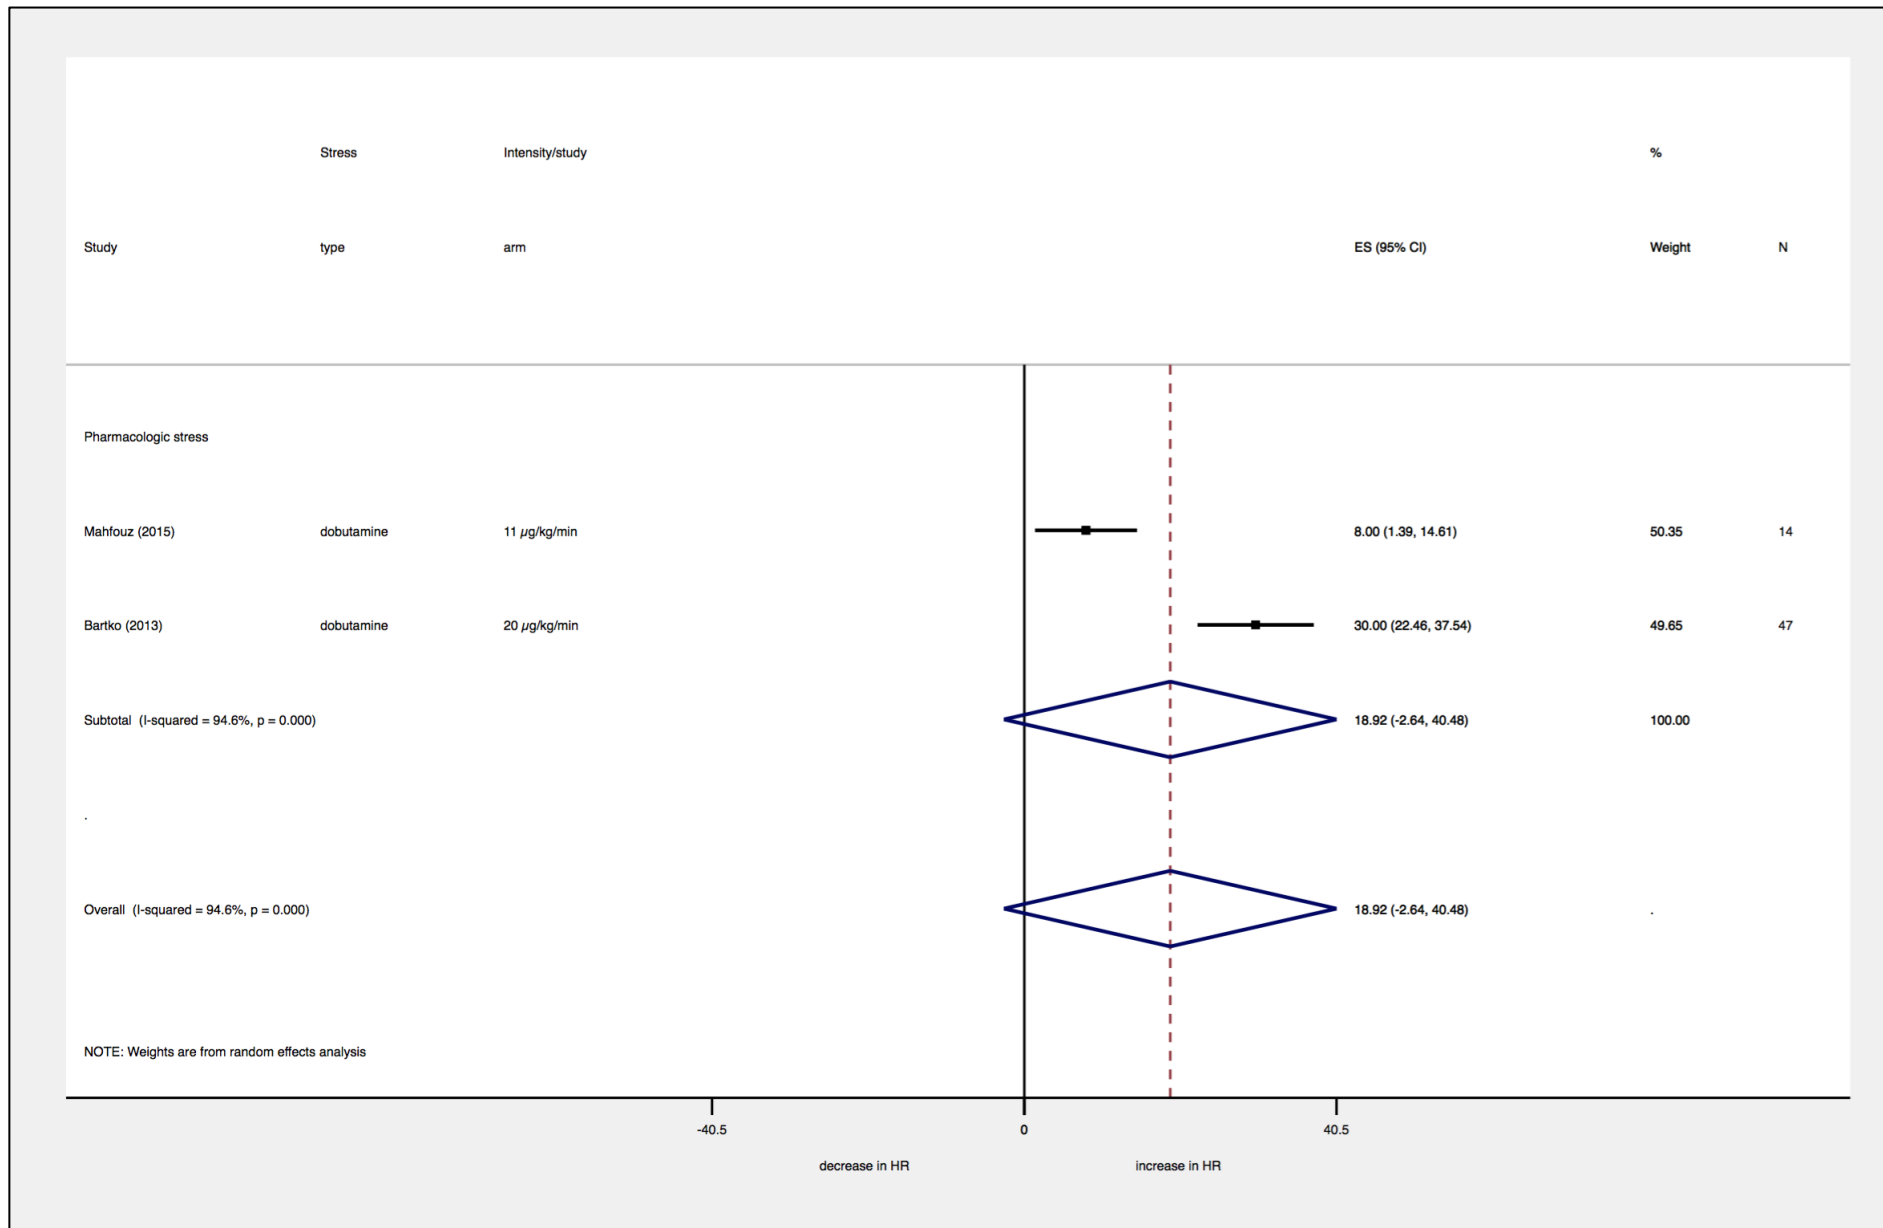

**Figure S14 (a).** HR Changes [bpm] in patients with low-flow, low-gradient aortic stenosis for moderate intensity stress.

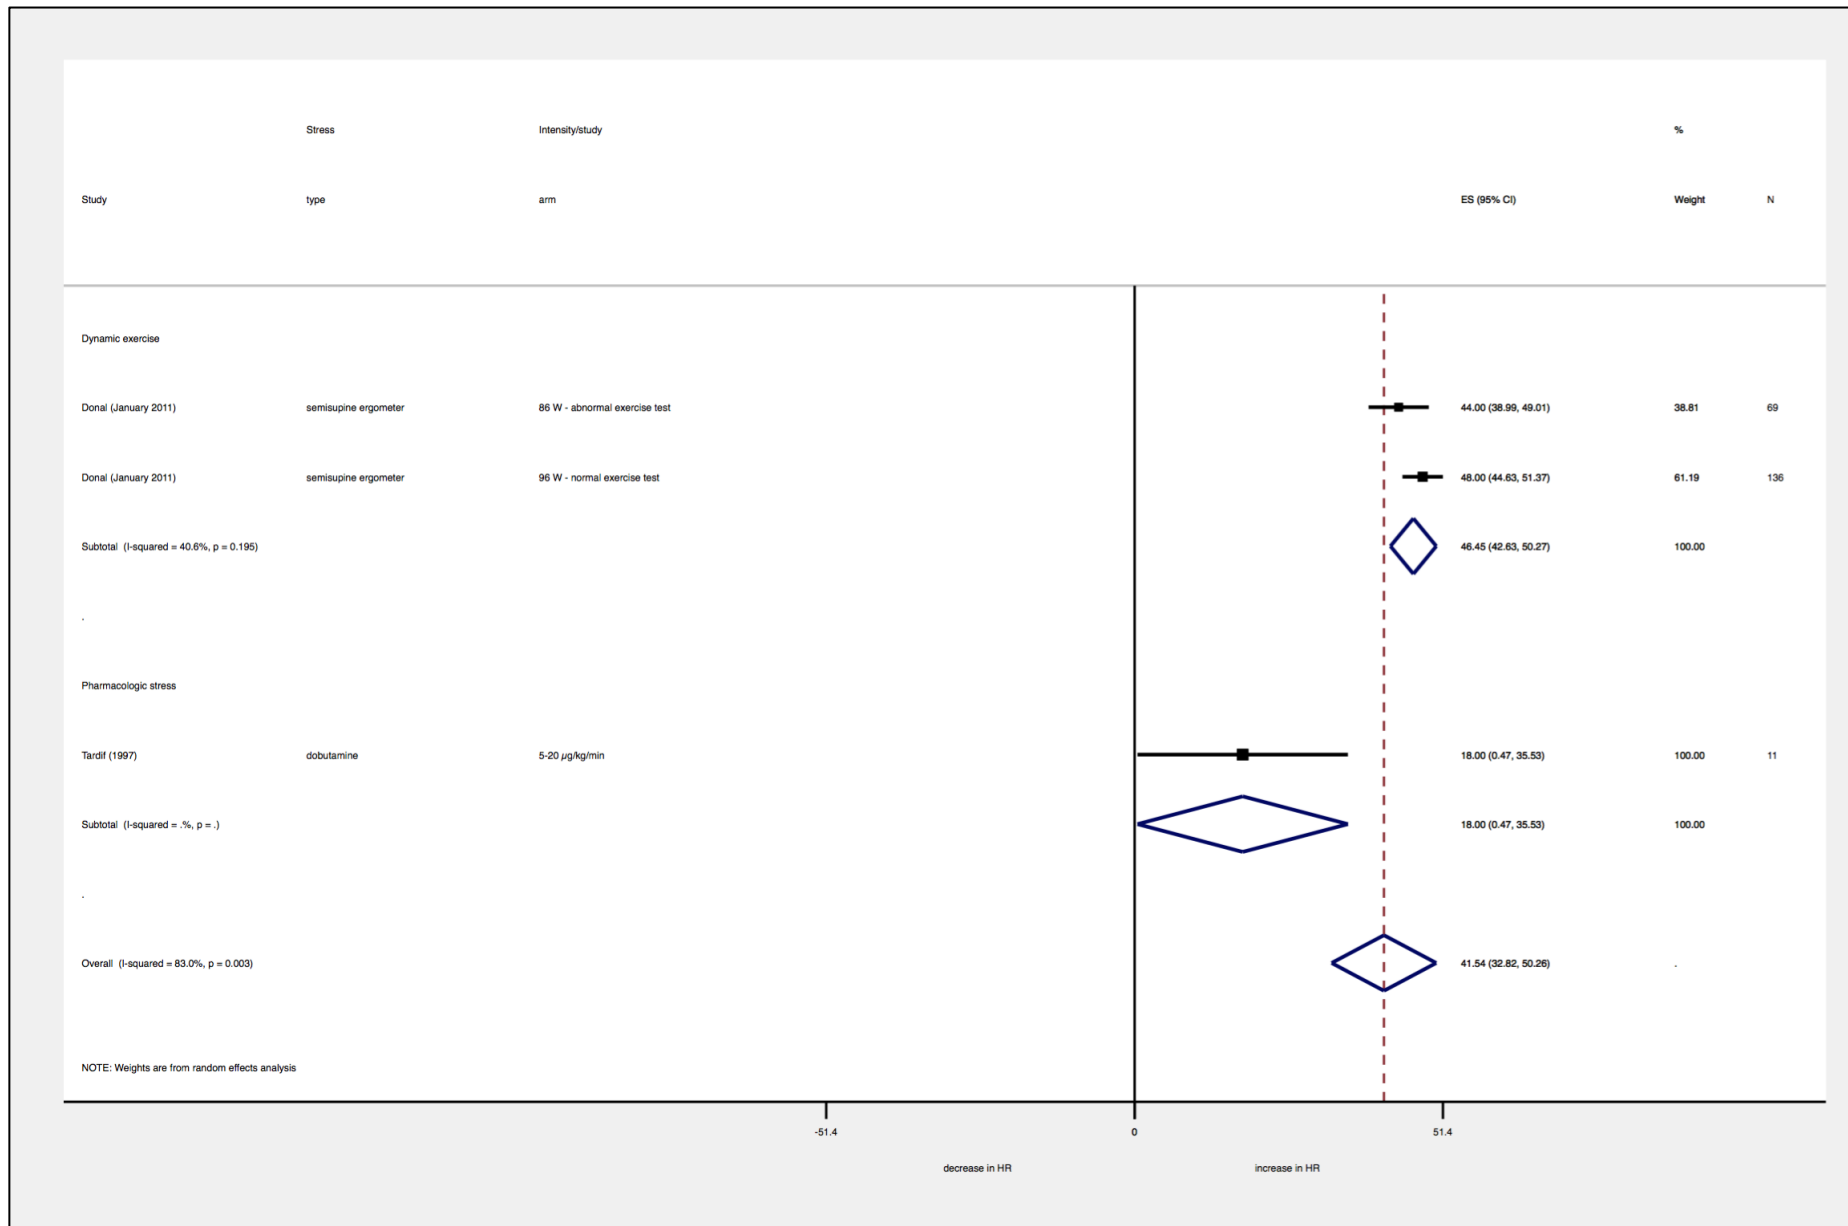

**Figure S14 (b).** HR Changes [bpm] in patients with aortic stenosis after excluding low-flow, low-gradient patients for moderate intensity stress.

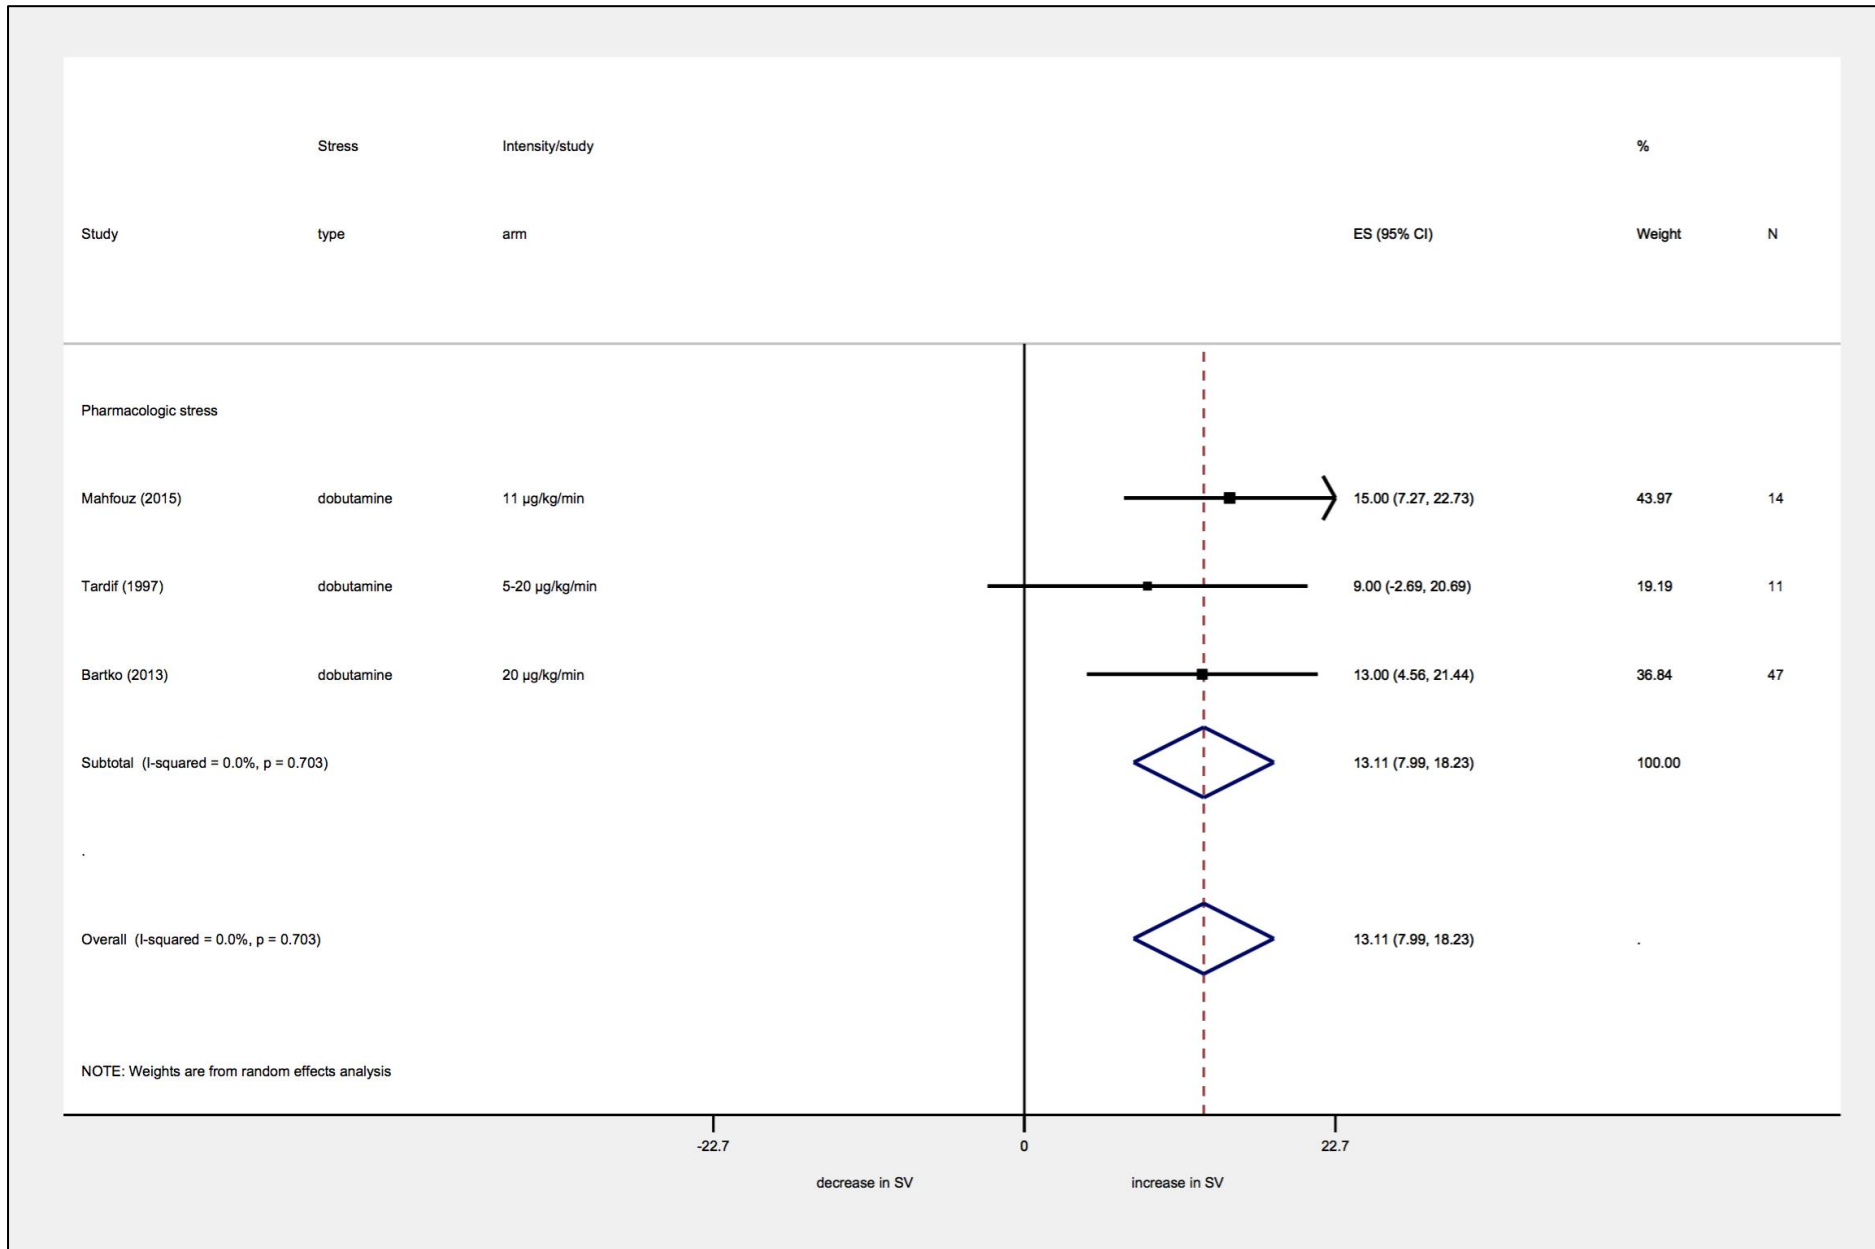

**Figure S15.** SV Changes [ml] in patients with aortic stenosis for moderate intensity stress.

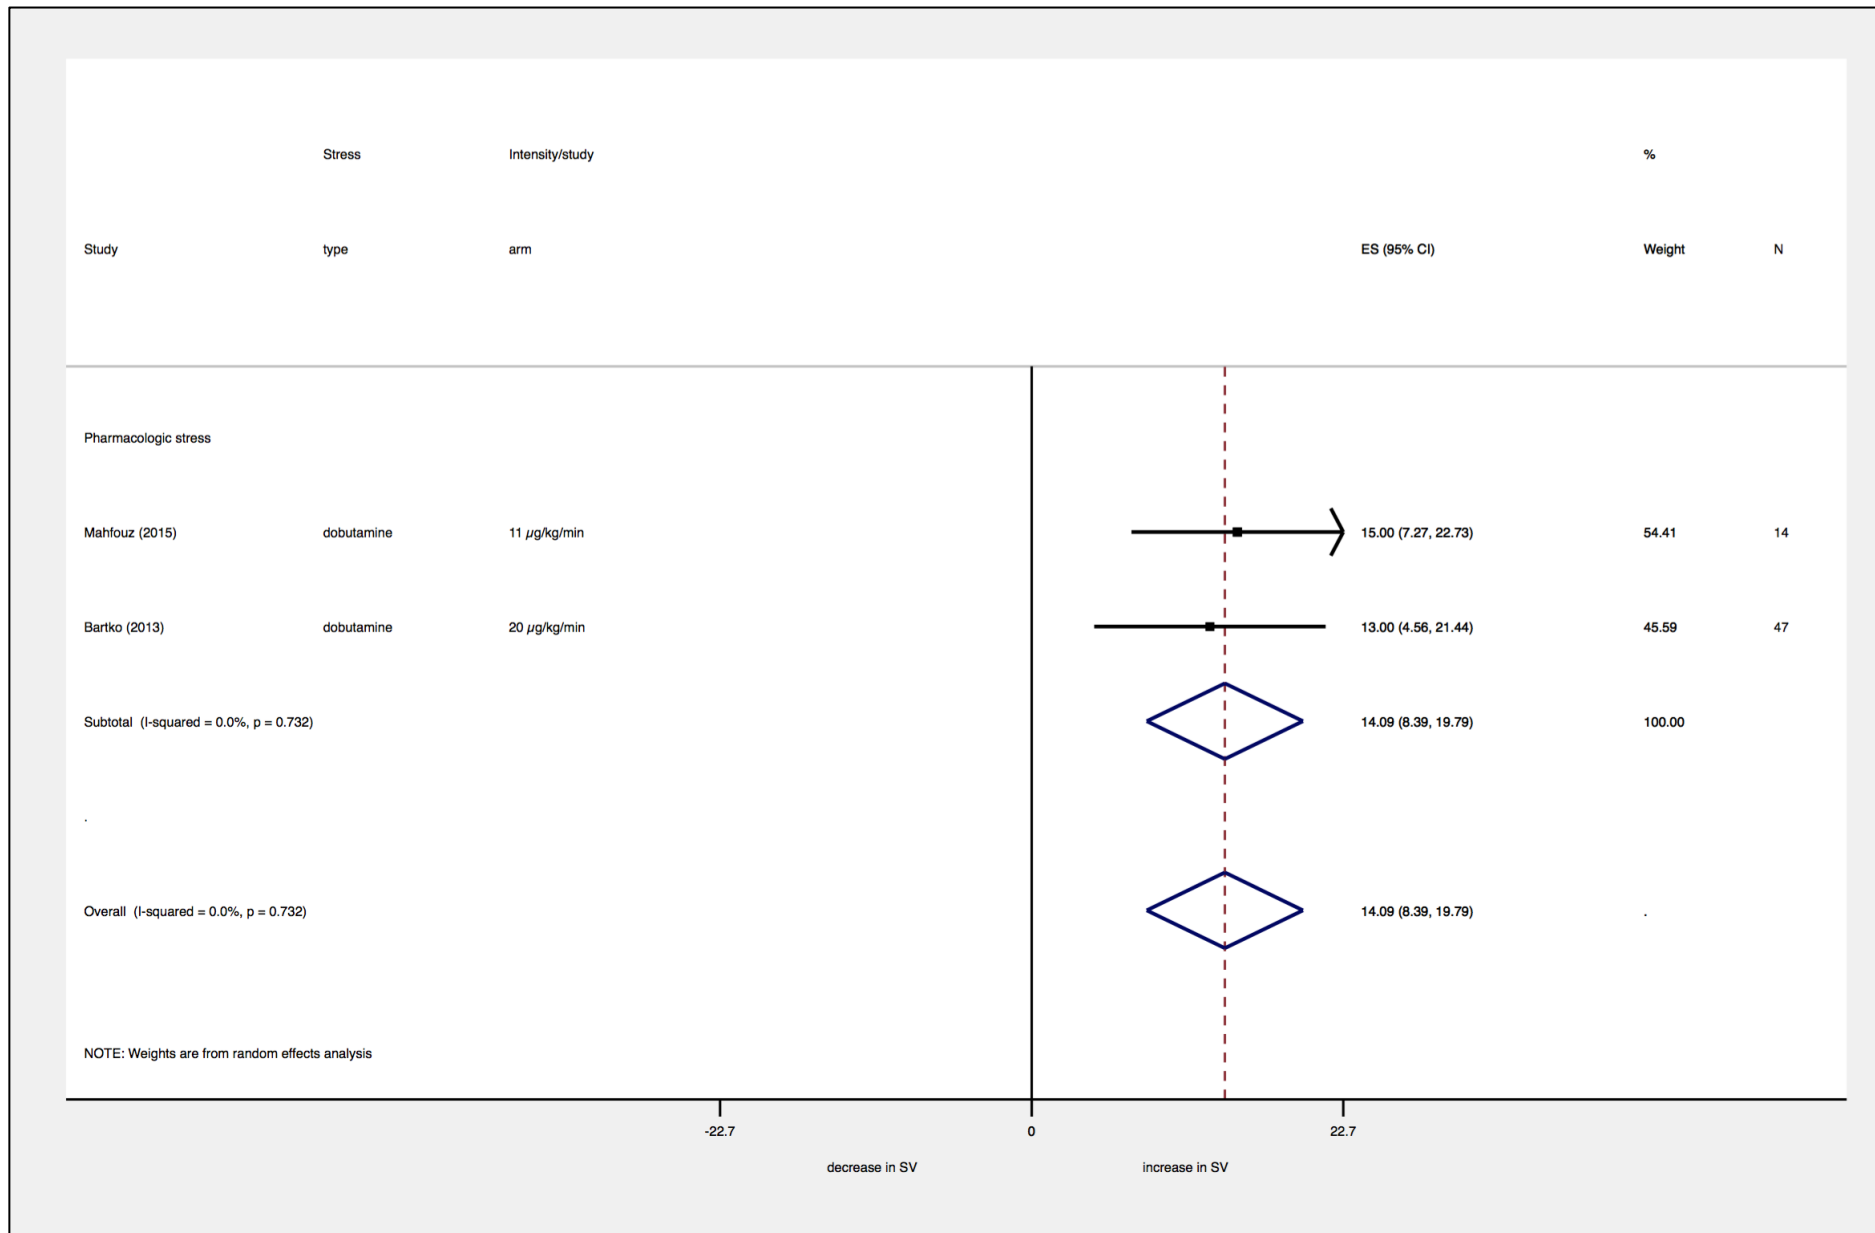

**Figure S15 (a).** SV Changes [ml] in patients with low-flow, low-gradient aortic stenosis for moderate intensity stress.



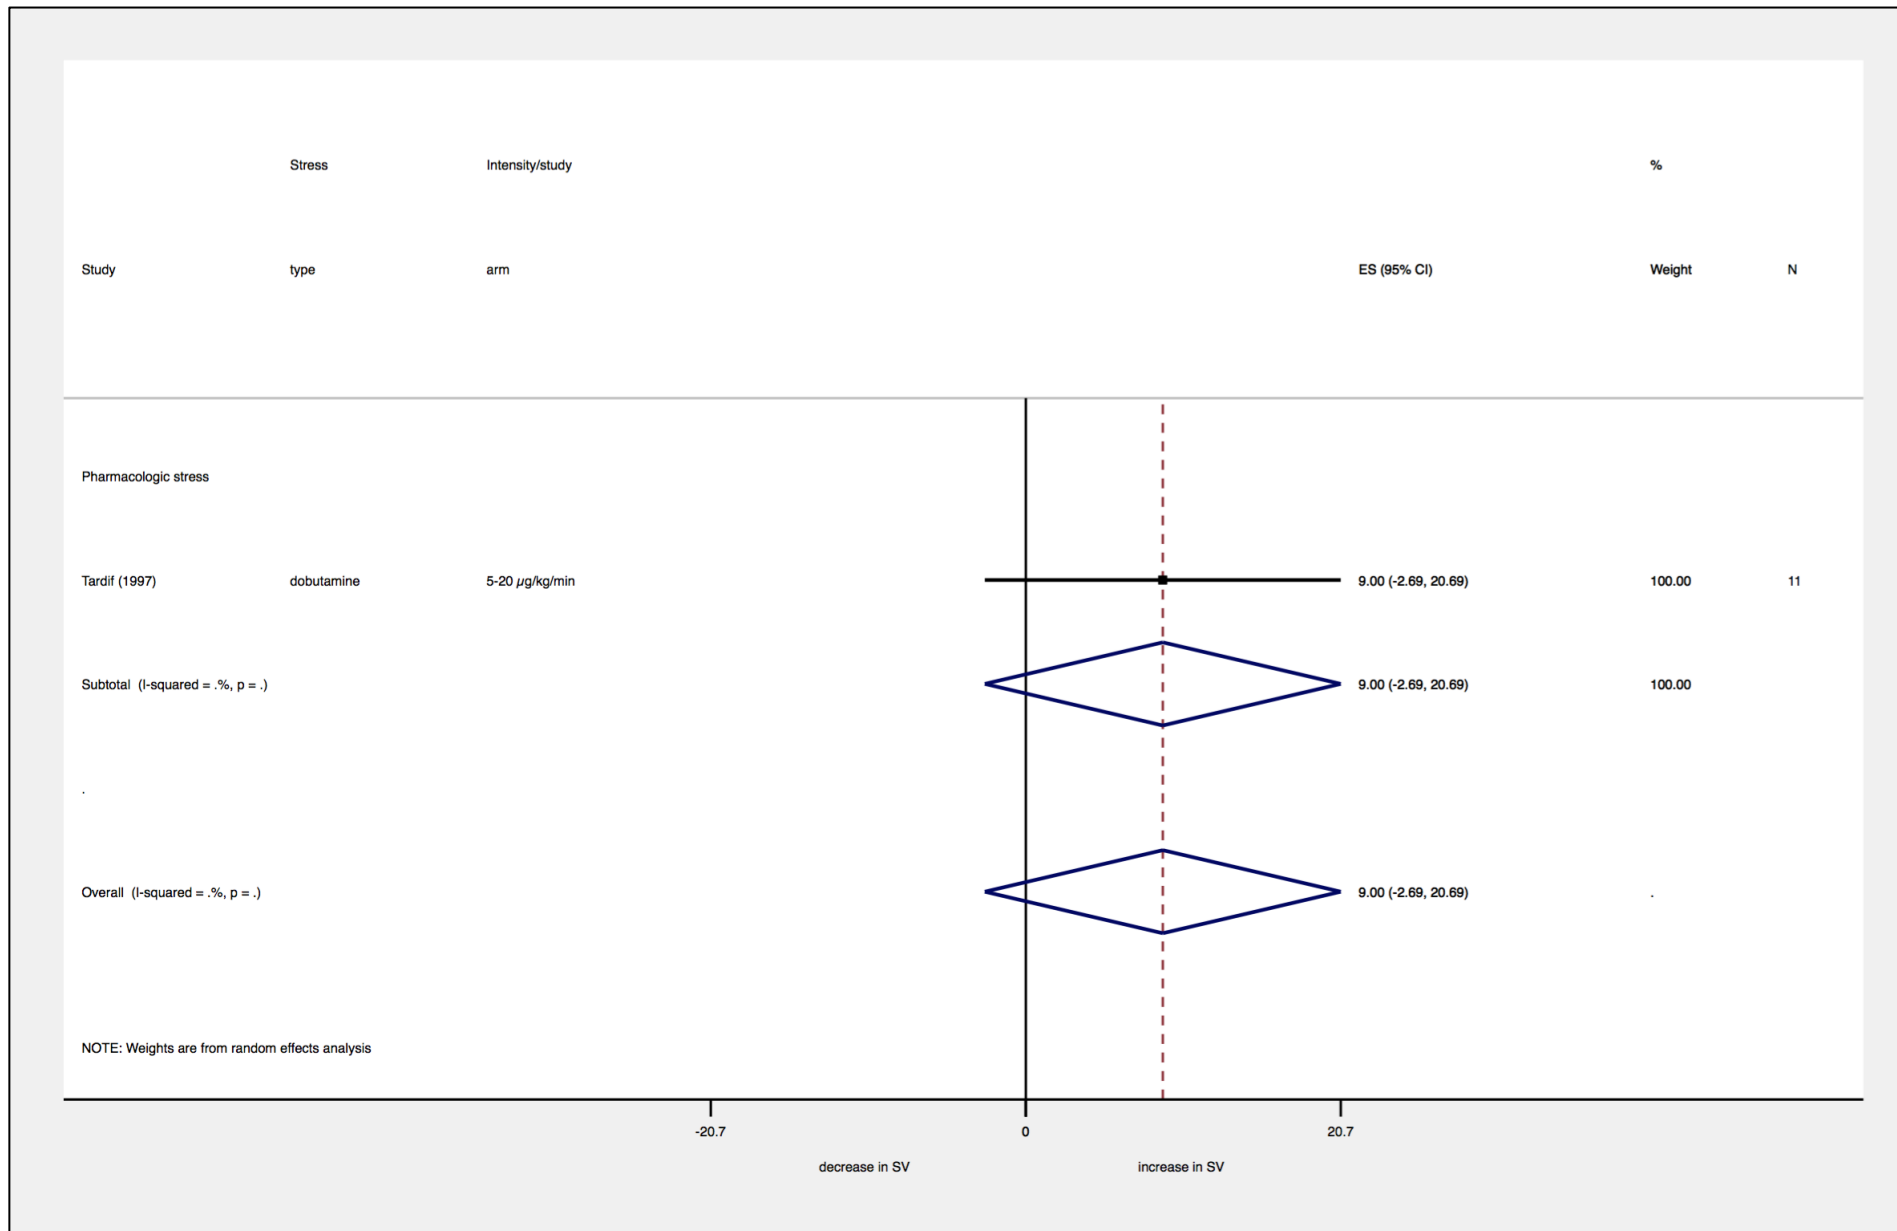

**Figure S15 (b).** SV Changes [ml] in patients with aortic stenosis after excluding low-flow, low-gradient patients for moderate intensity stress.

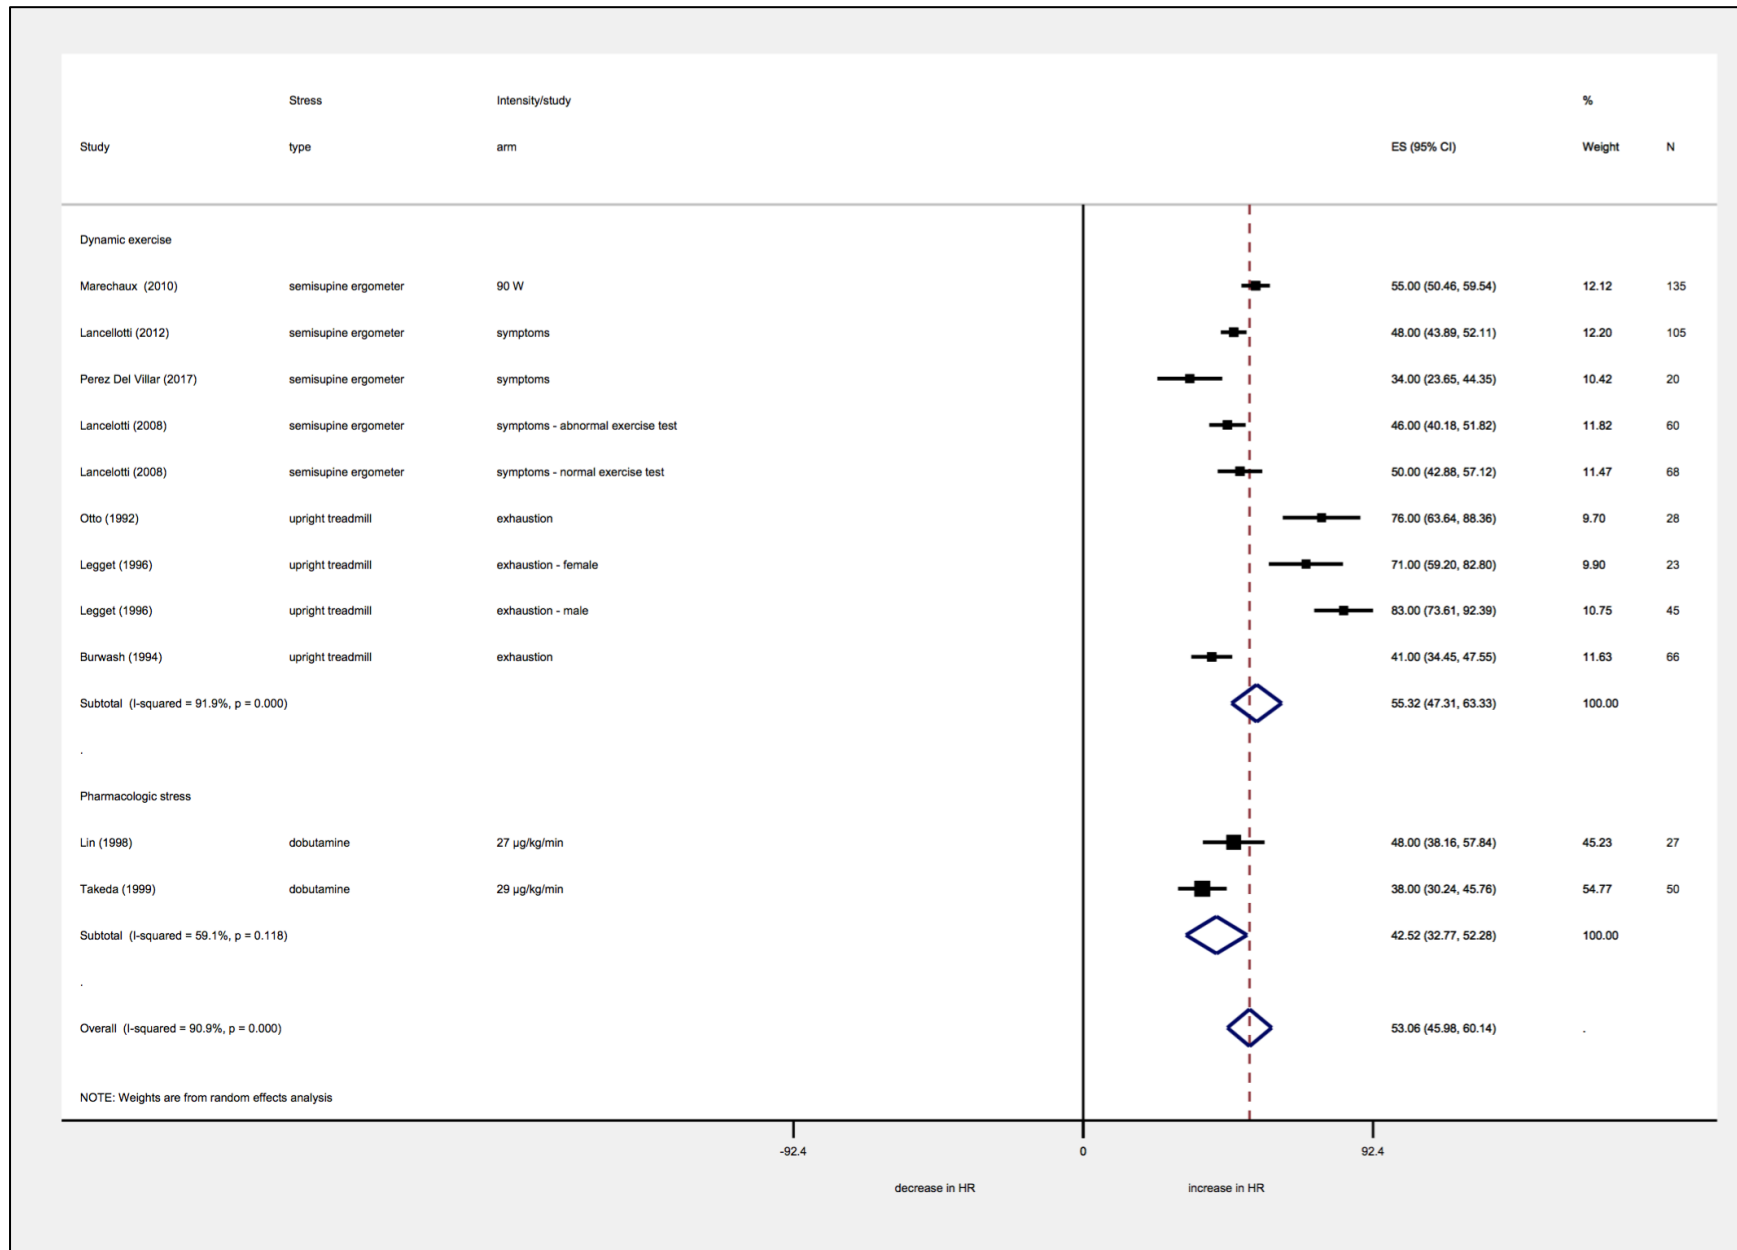

Figure S16. HR Changes [bpm] in patients with aortic stenosis for high intensity stress.

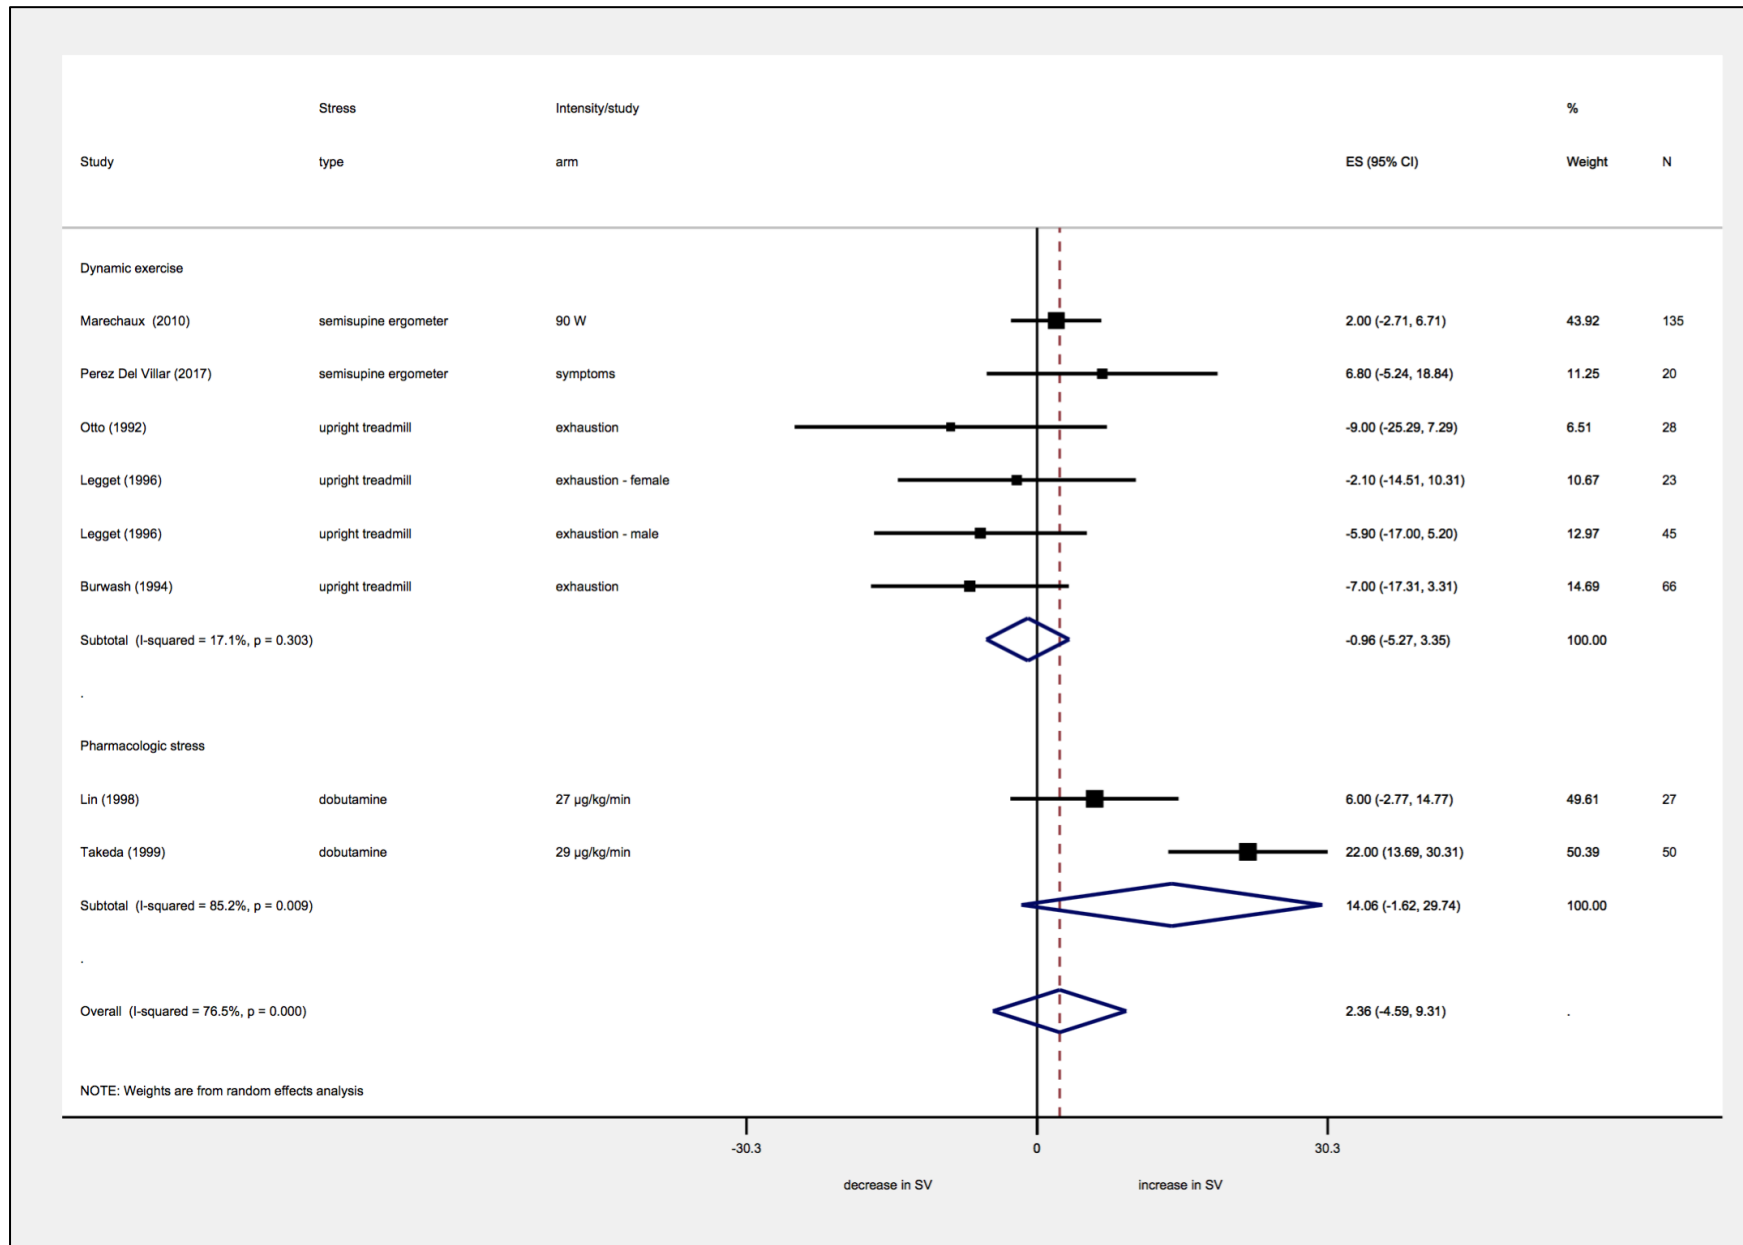

Figure S17. SV Changes [ml] in patients with aortic stenosis for high intensity stress.

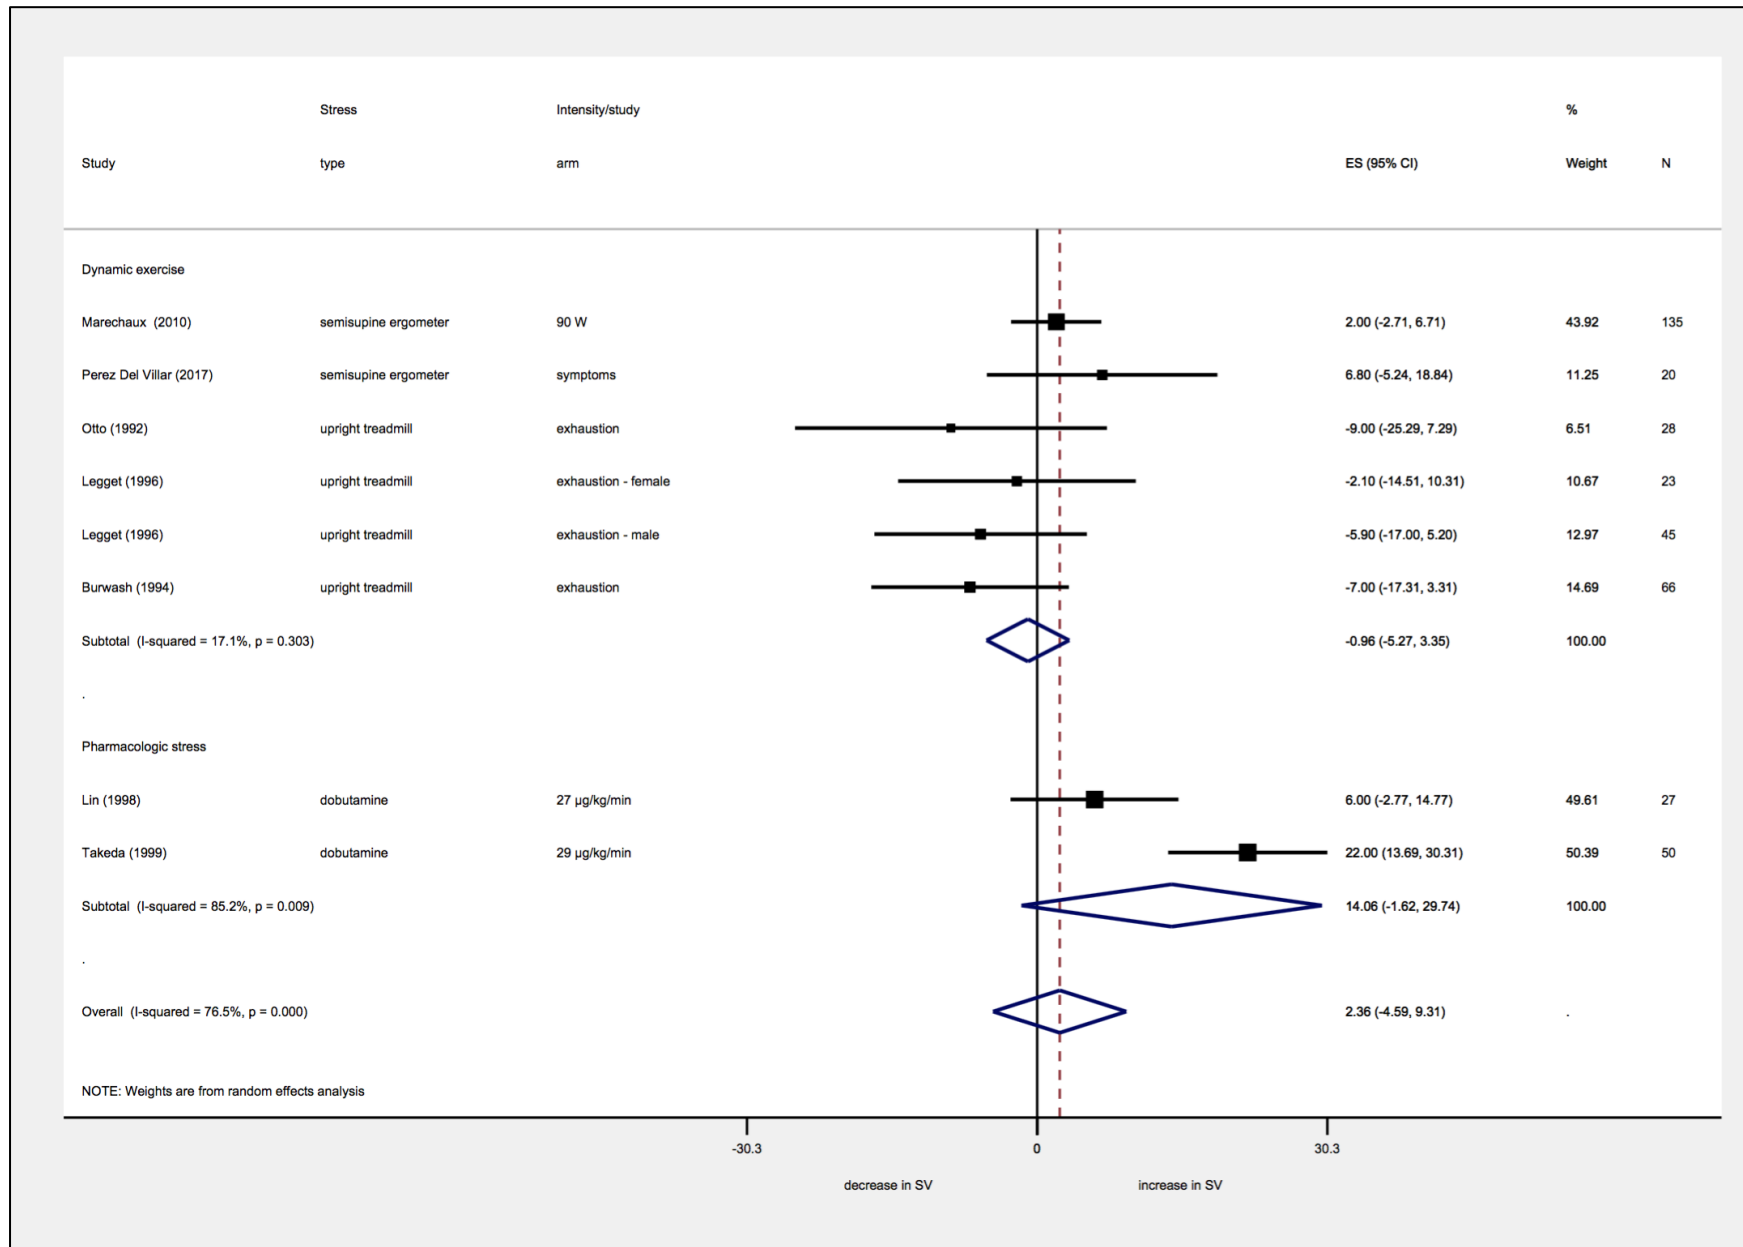

Figure S18. CO Changes [l/min] in patients with aortic stenosis for high intensity stress.

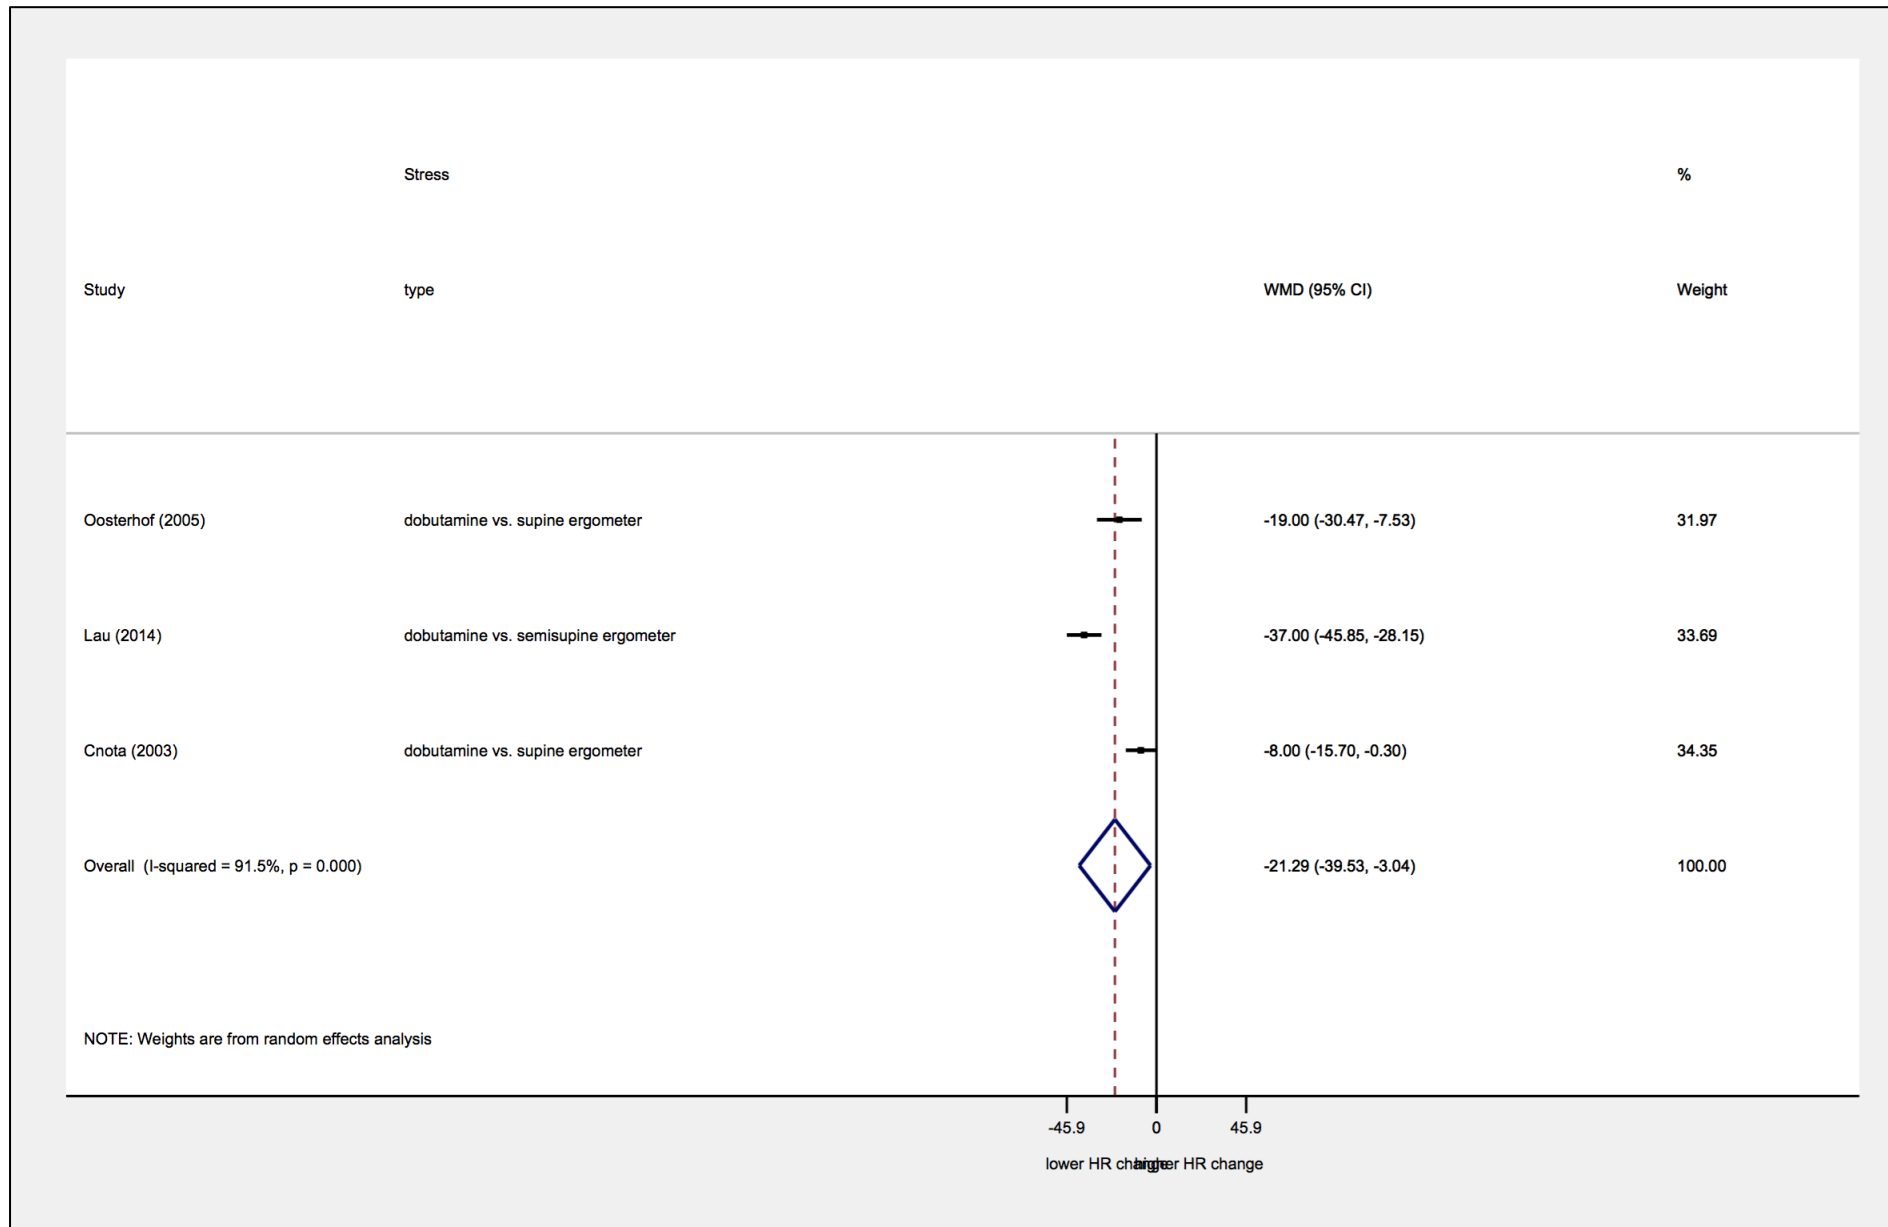

**Figure S19.** Differences in HR Changes [bpm] in healthy subjects for dobutamine vs. dynamic stress testing in directly comparative studies.

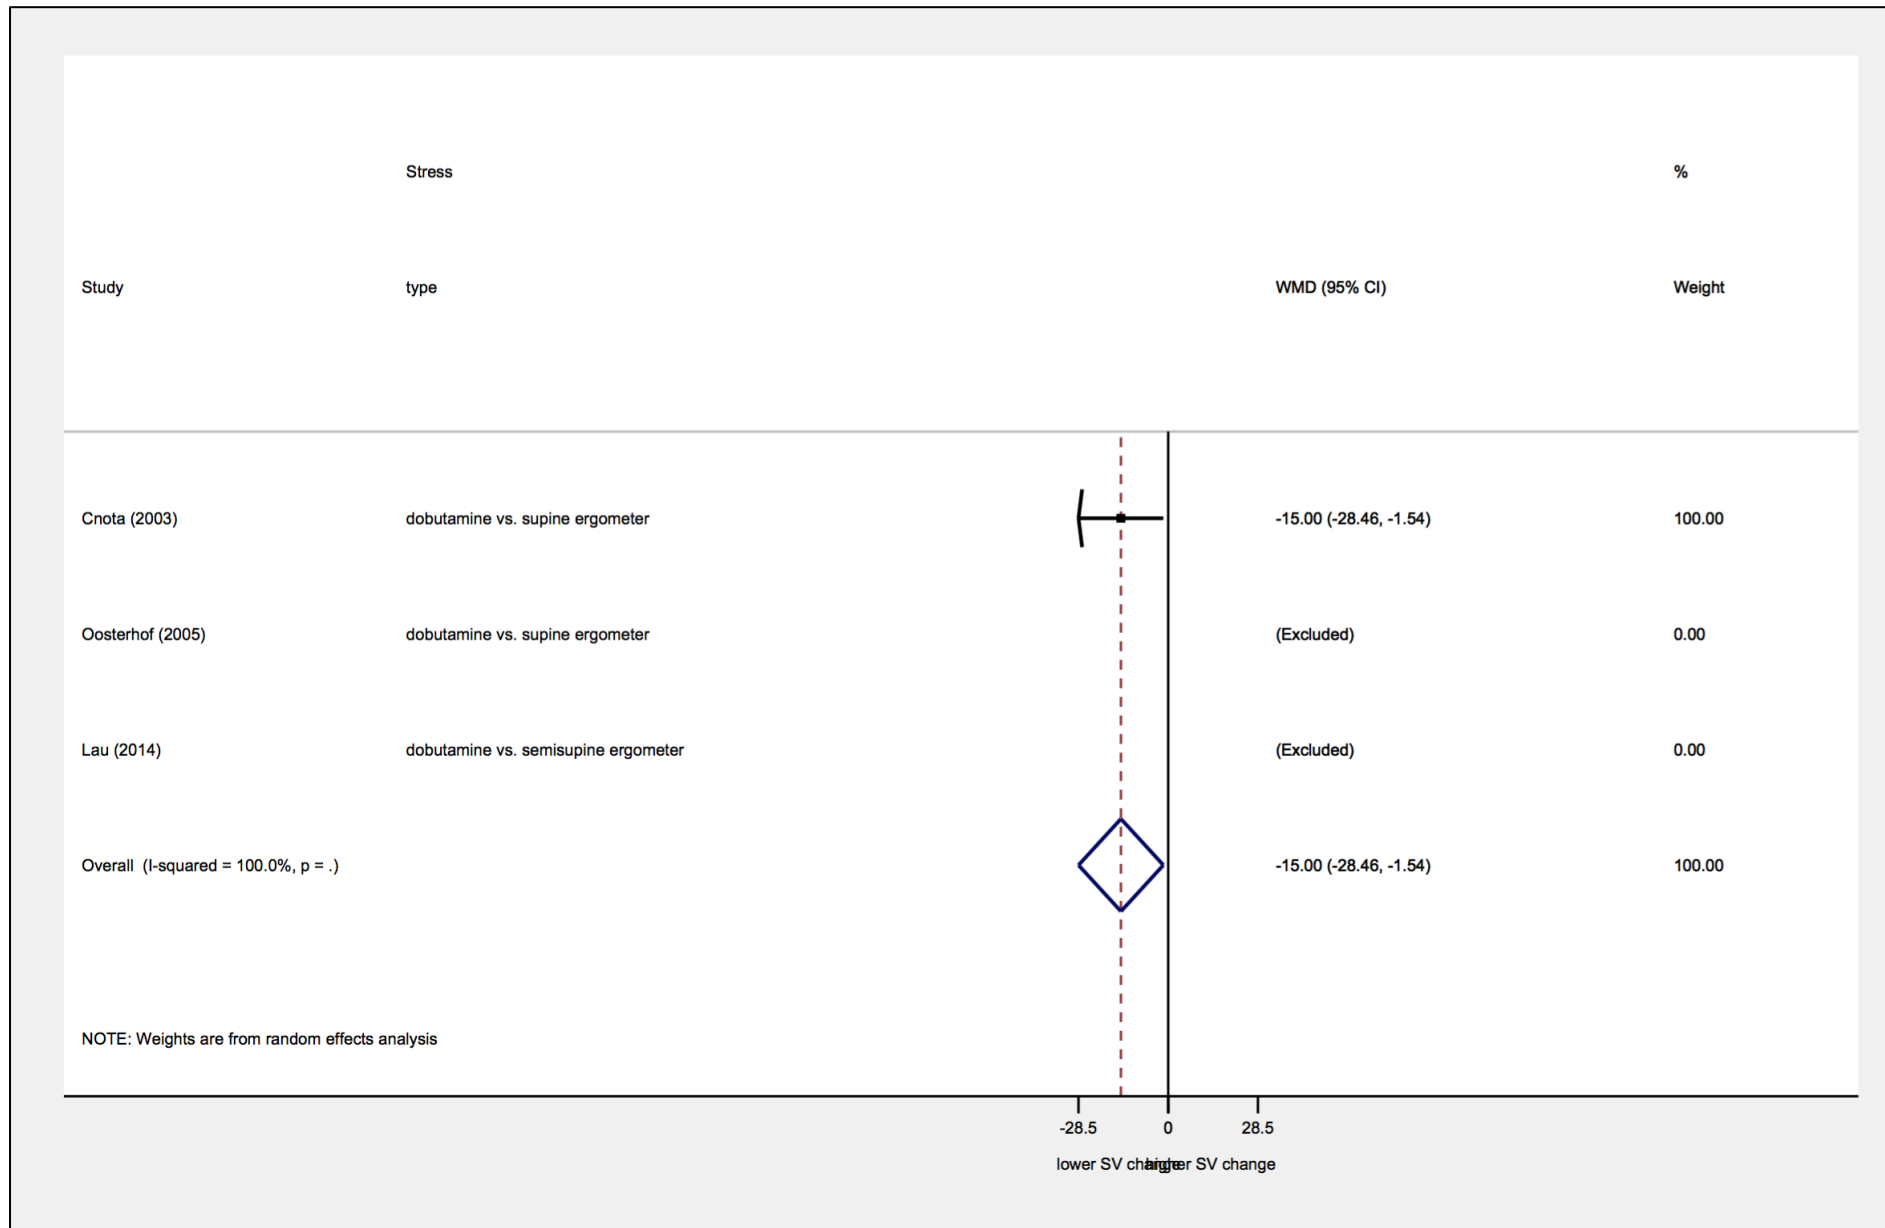

**Figure S 20.** Differences in SV Changes [ml] in healthy subjects for dobutamine vs. dynamic stress testing in directly comparative studies.

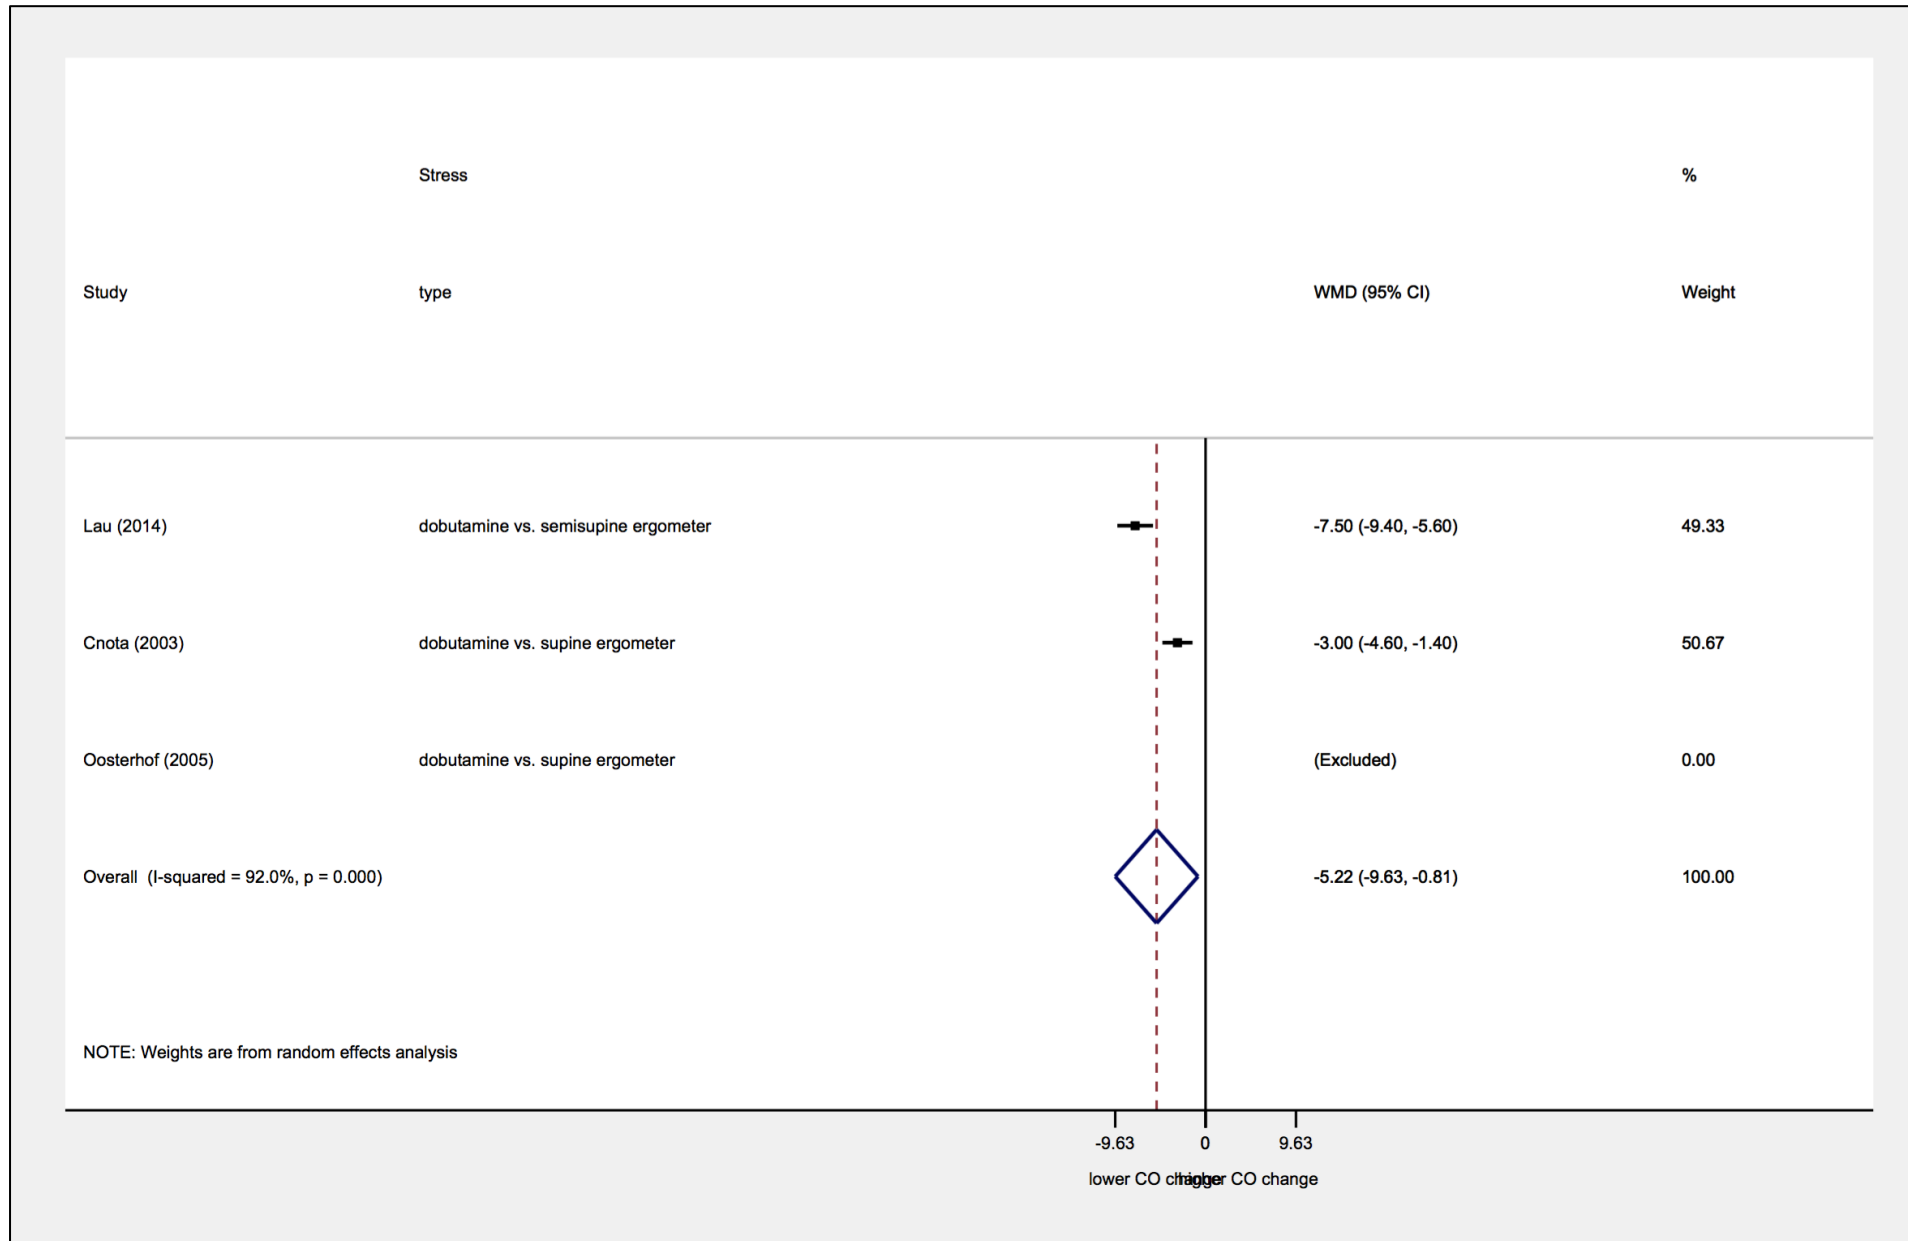

**Figure S 21.** Differences in CO Changes [l/min] in healthy subjects for dobutamine vs. dynamic stress testing in directly comparative studies.

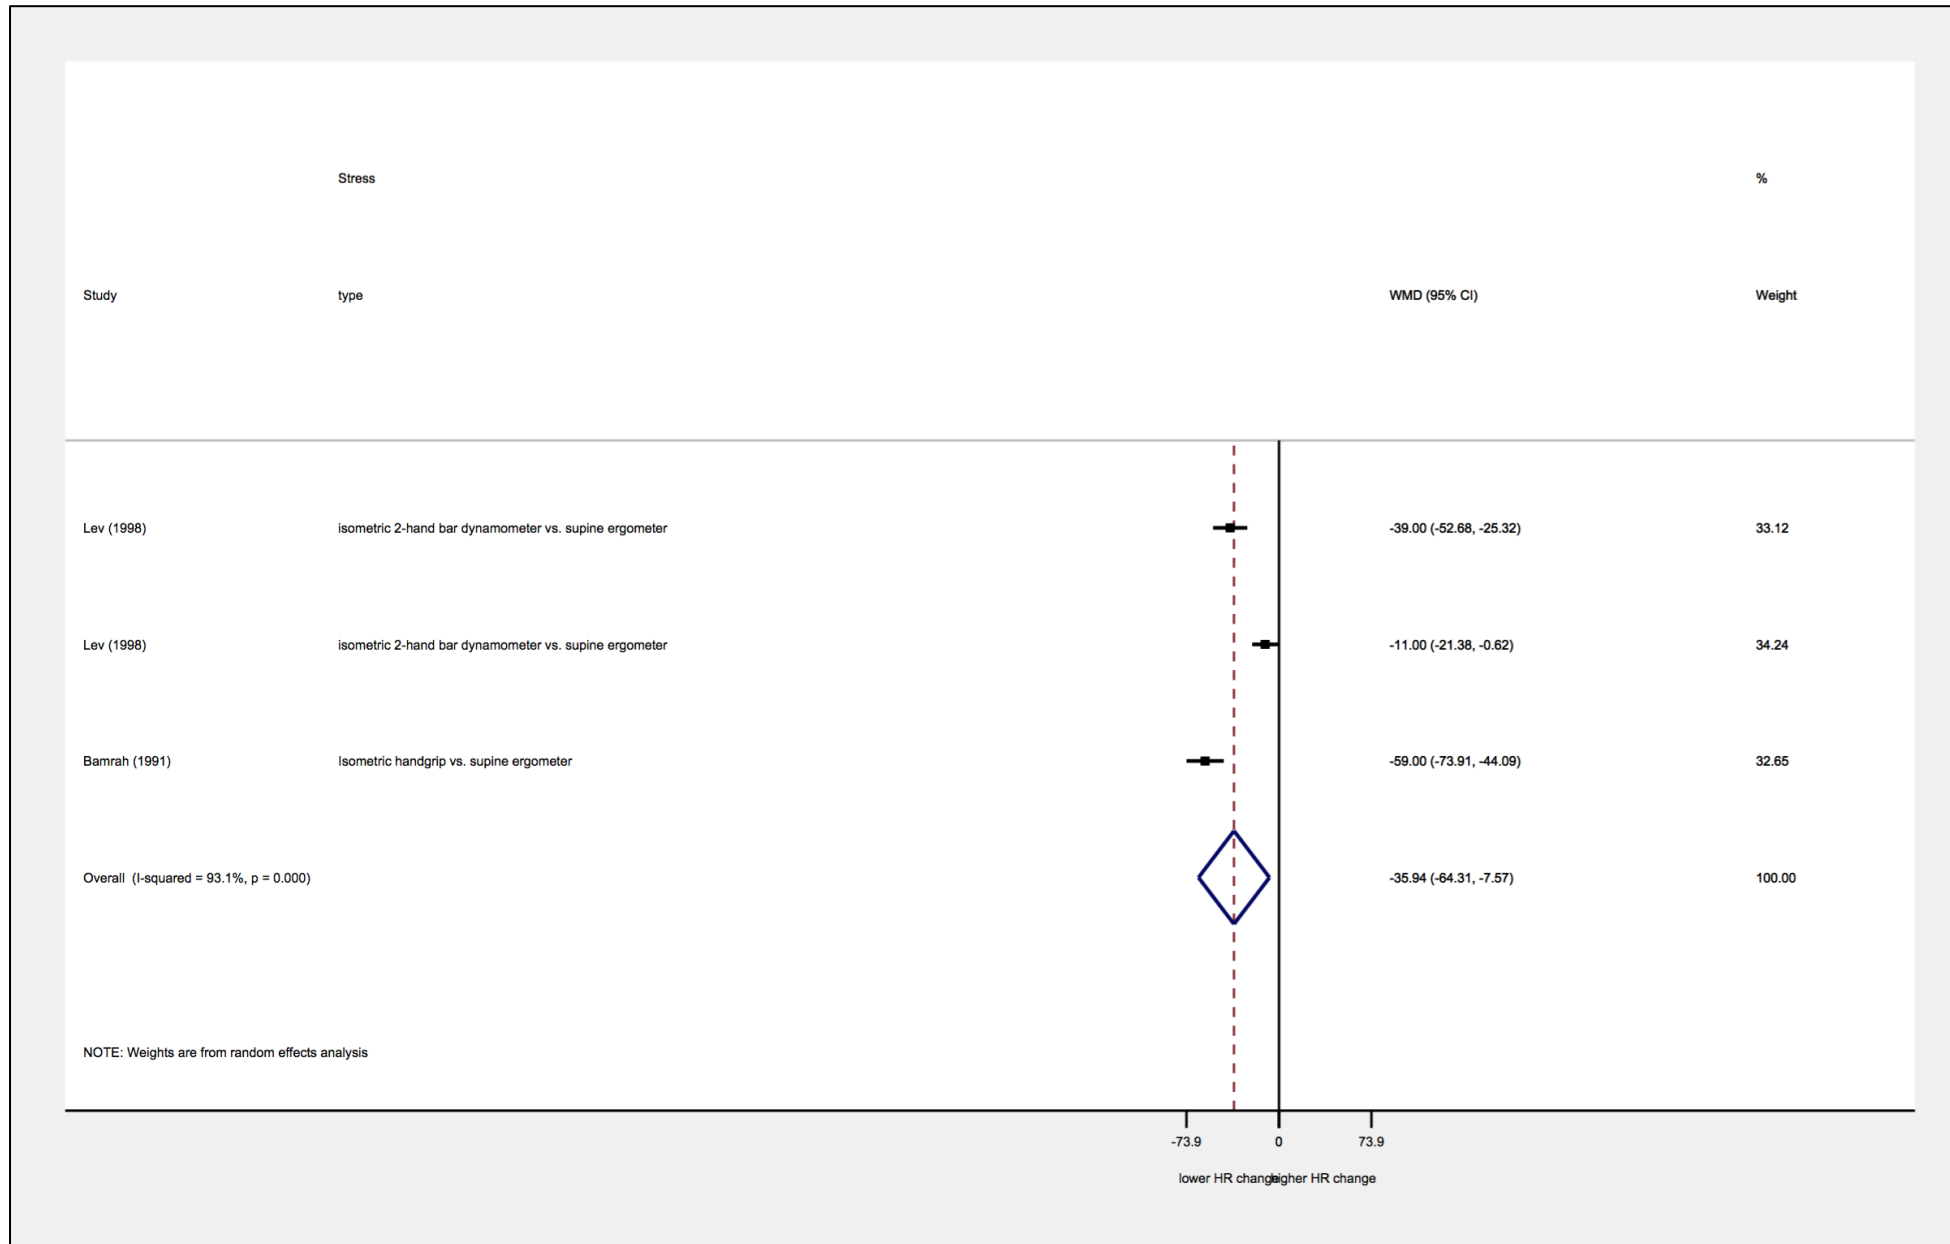

**Figure S 22.** Differences in HR Changes [bpm] in healthy subjects for isometric vs. dynamic stress testing in directly comparative studies.



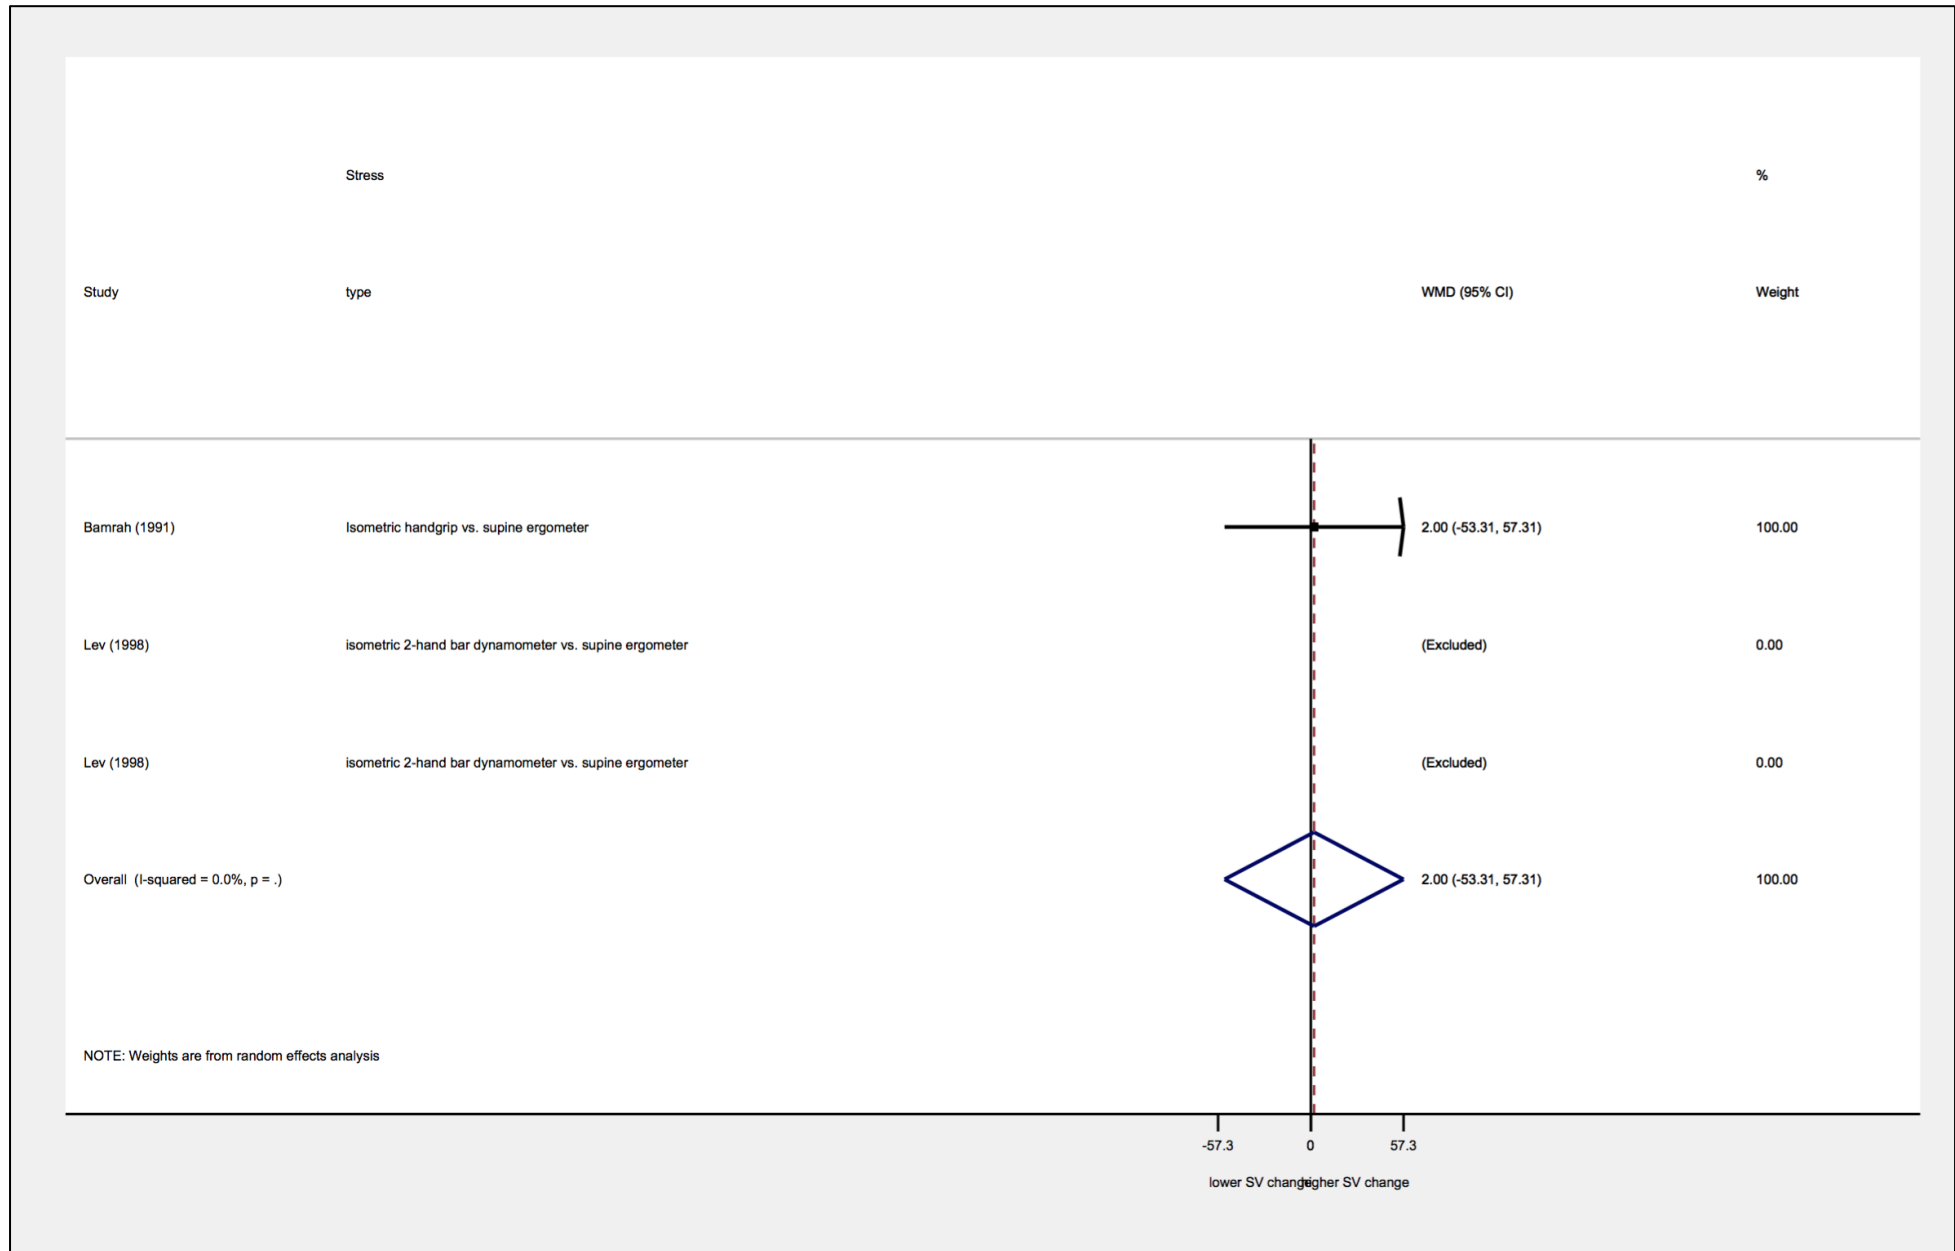

**Figure S 23.** Differences in SV Changes [ml] in healthy subjects for isometric vs. dynamic stress testing in directly comparative studies.

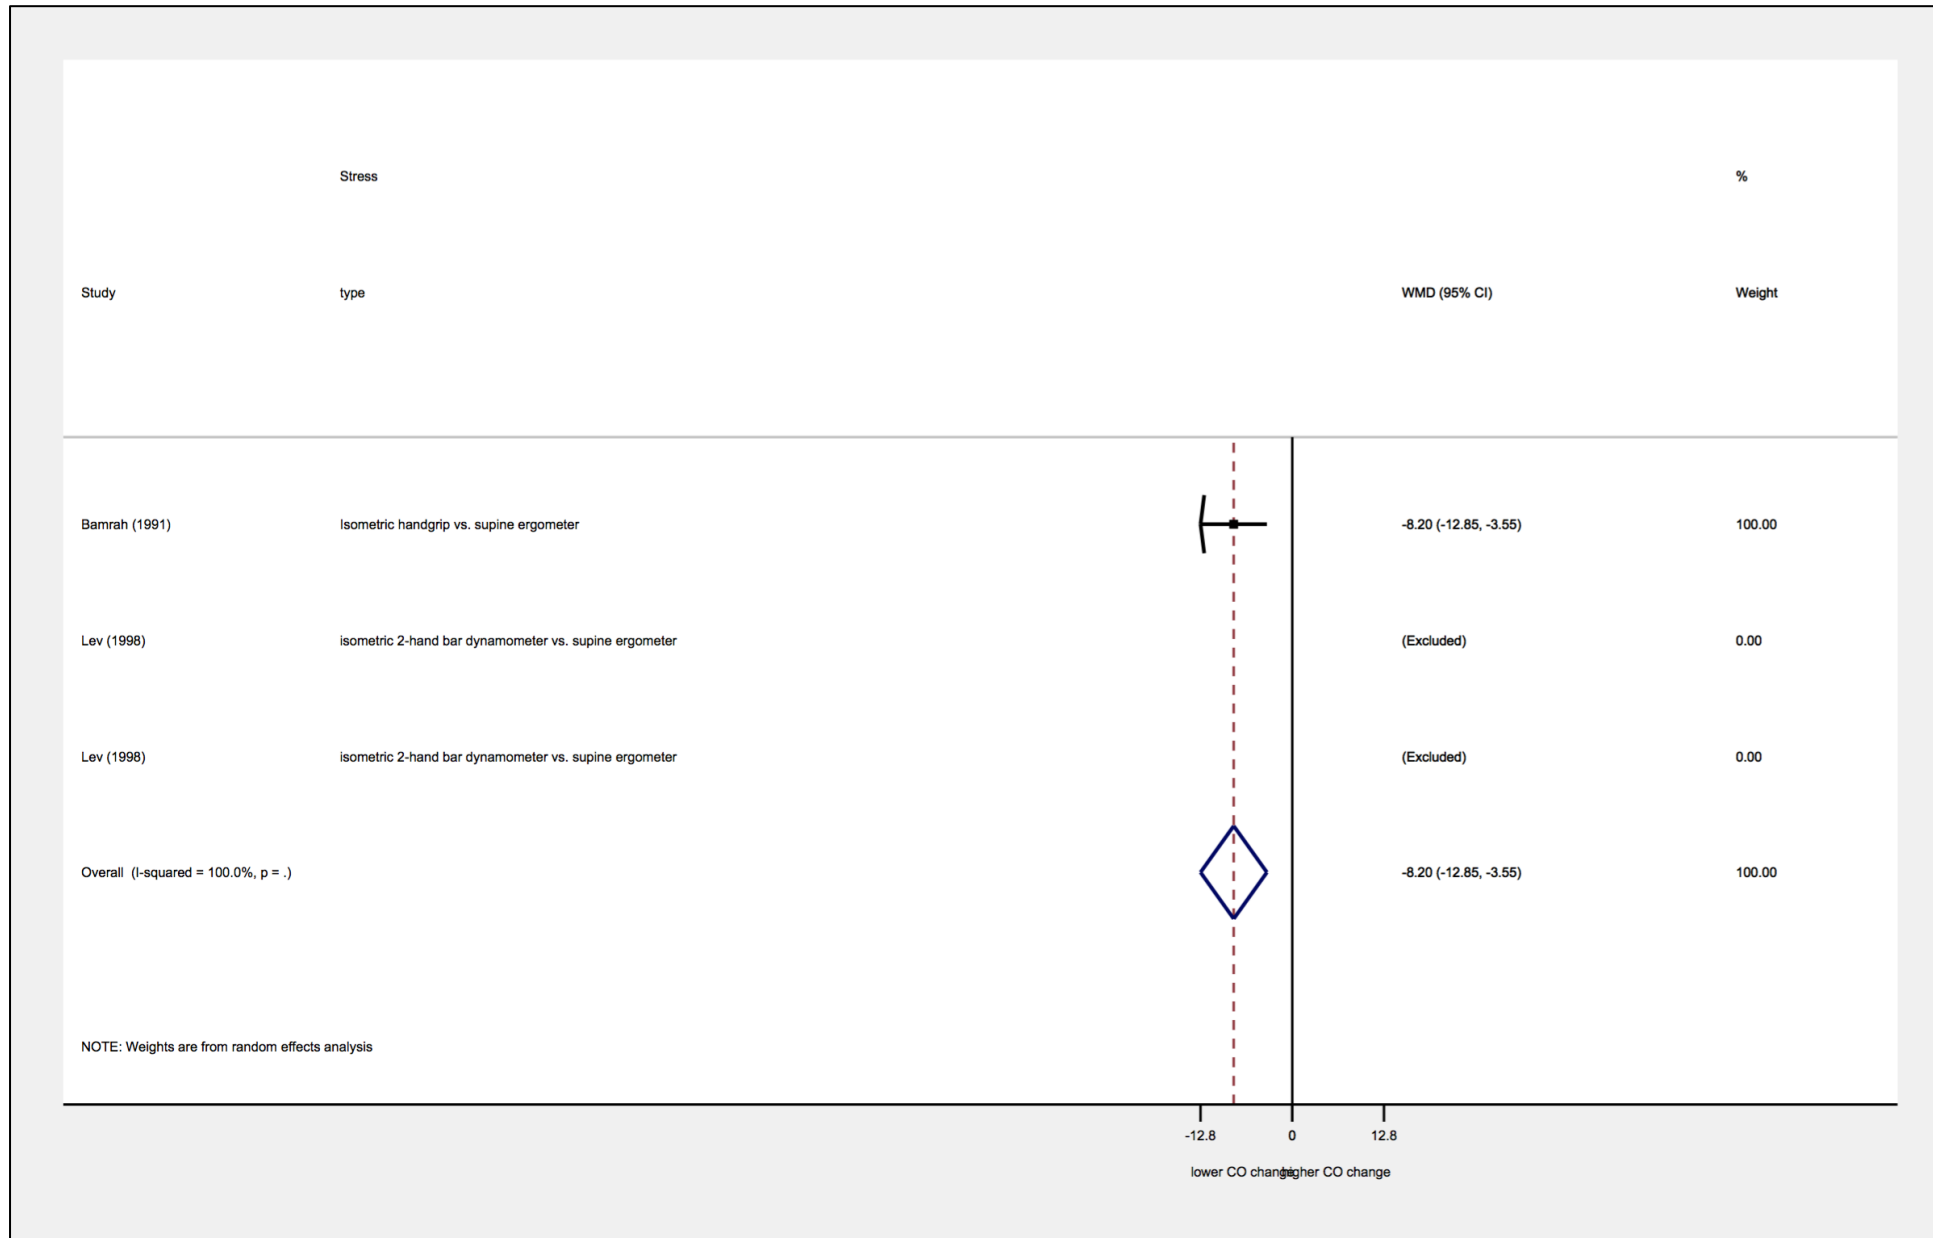

**Figure S 24.** Differences in CO Changes [l/min] in healthy subjects for isometric vs. dynamic stress testing in directly comparative studies.

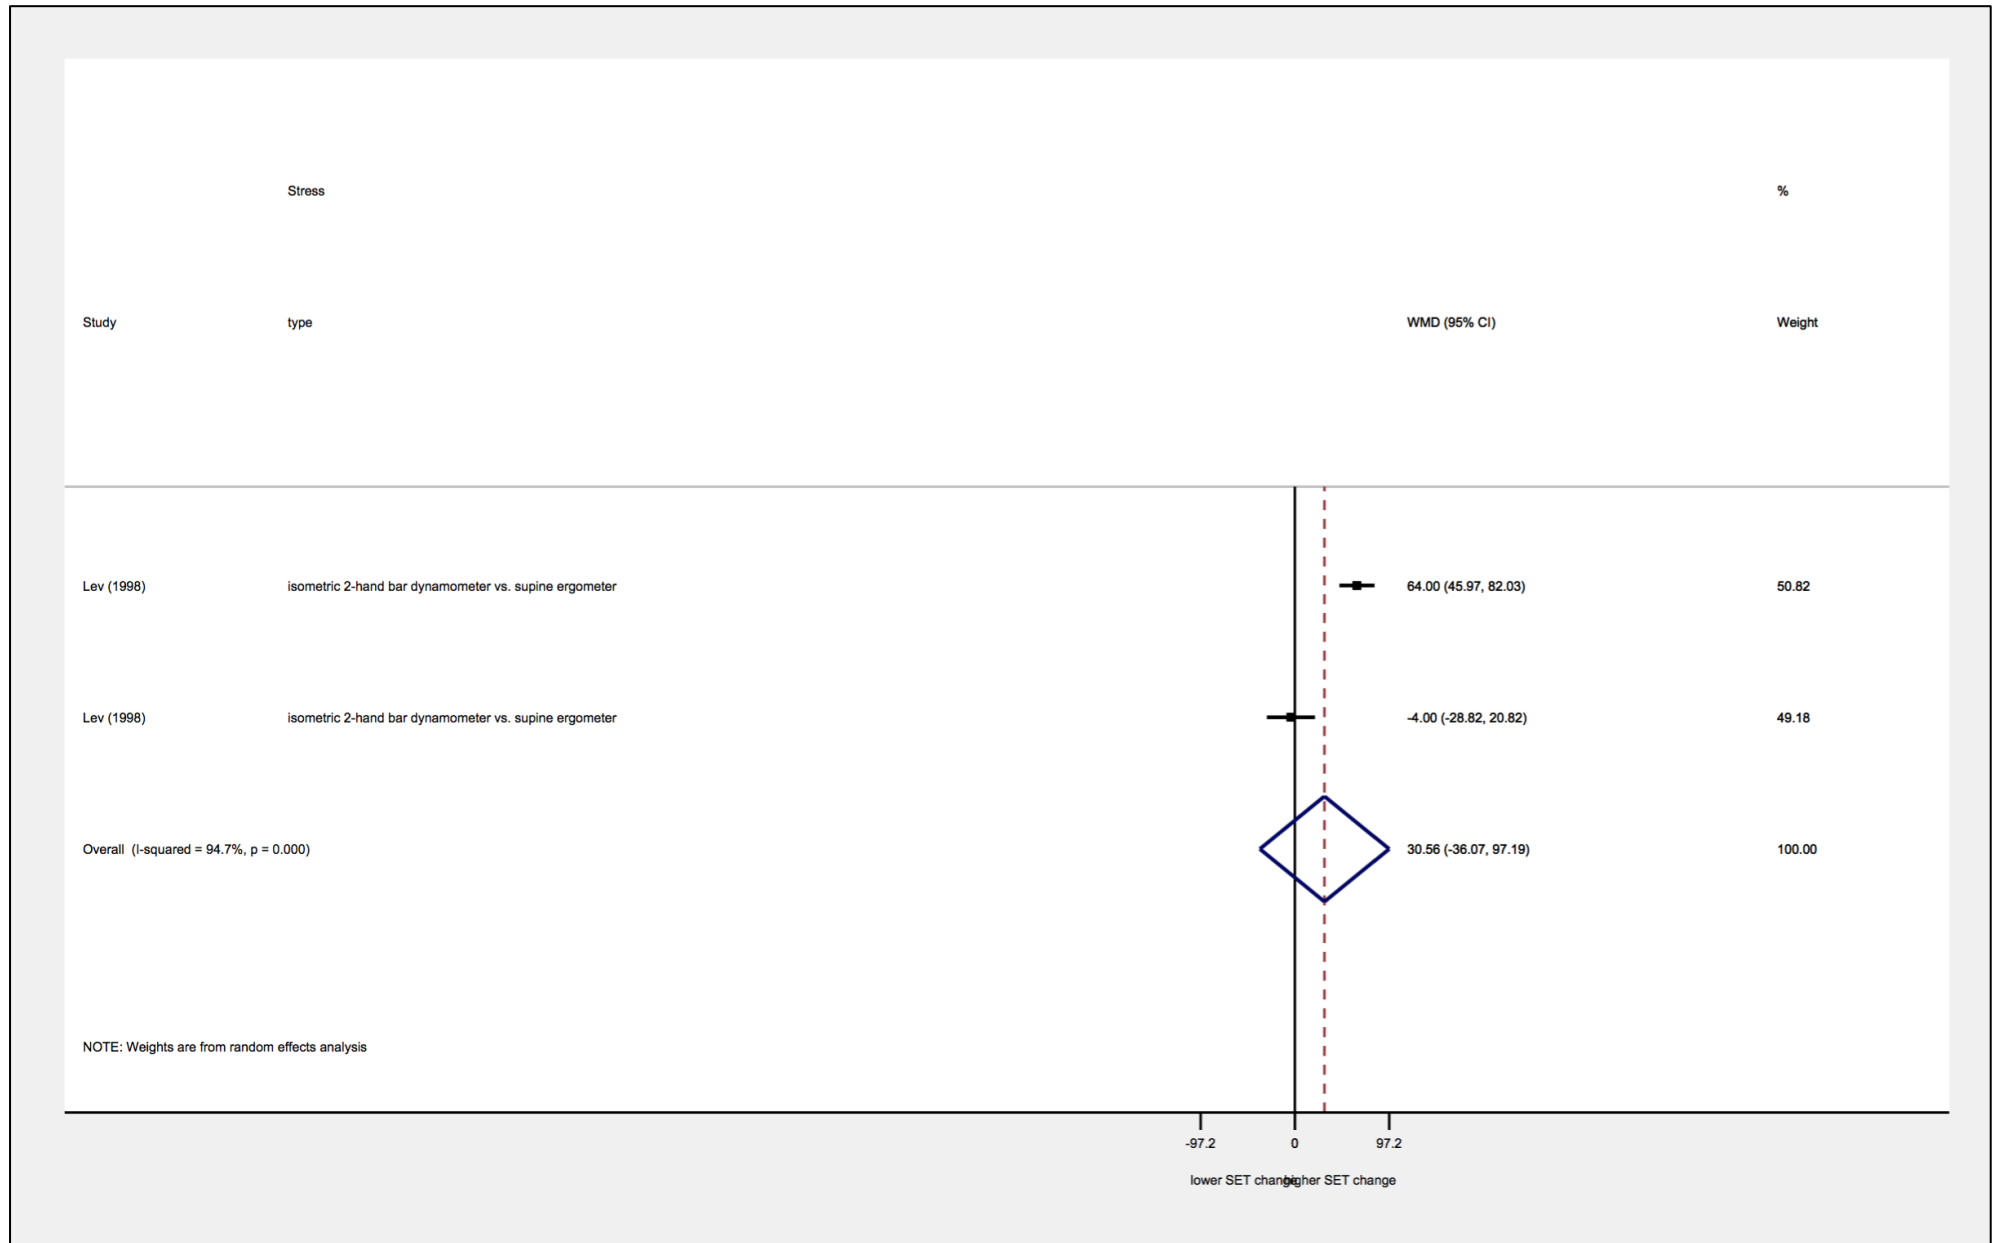

**Figure S 25.** Differences in SET Changes [ms] in healthy subjects for isometric vs. dynamic stress testing in directly comparative studies.
